# Supplementary material for: Synthesis and Biological Activity of Novel O-Alkyl Derivatives of Naringenin and Their Oximes
Source: PubMed Central journal article supplement (PMC6151618; doi:10.3390/molecules22091485), 2017-09-06
Supplement: molecules-22-01485-s001.pdf [file molecules-22-01485-s001.pdf]

# Synthesis and Biological Activity of Novel *O*-alkyl Derivatives of Naringenin and Their Oximes

Joanna Kozłowska, Bartłomiej Potaniec, Barbara Żarowska and Mirosław Anioł

## Supplementary materials

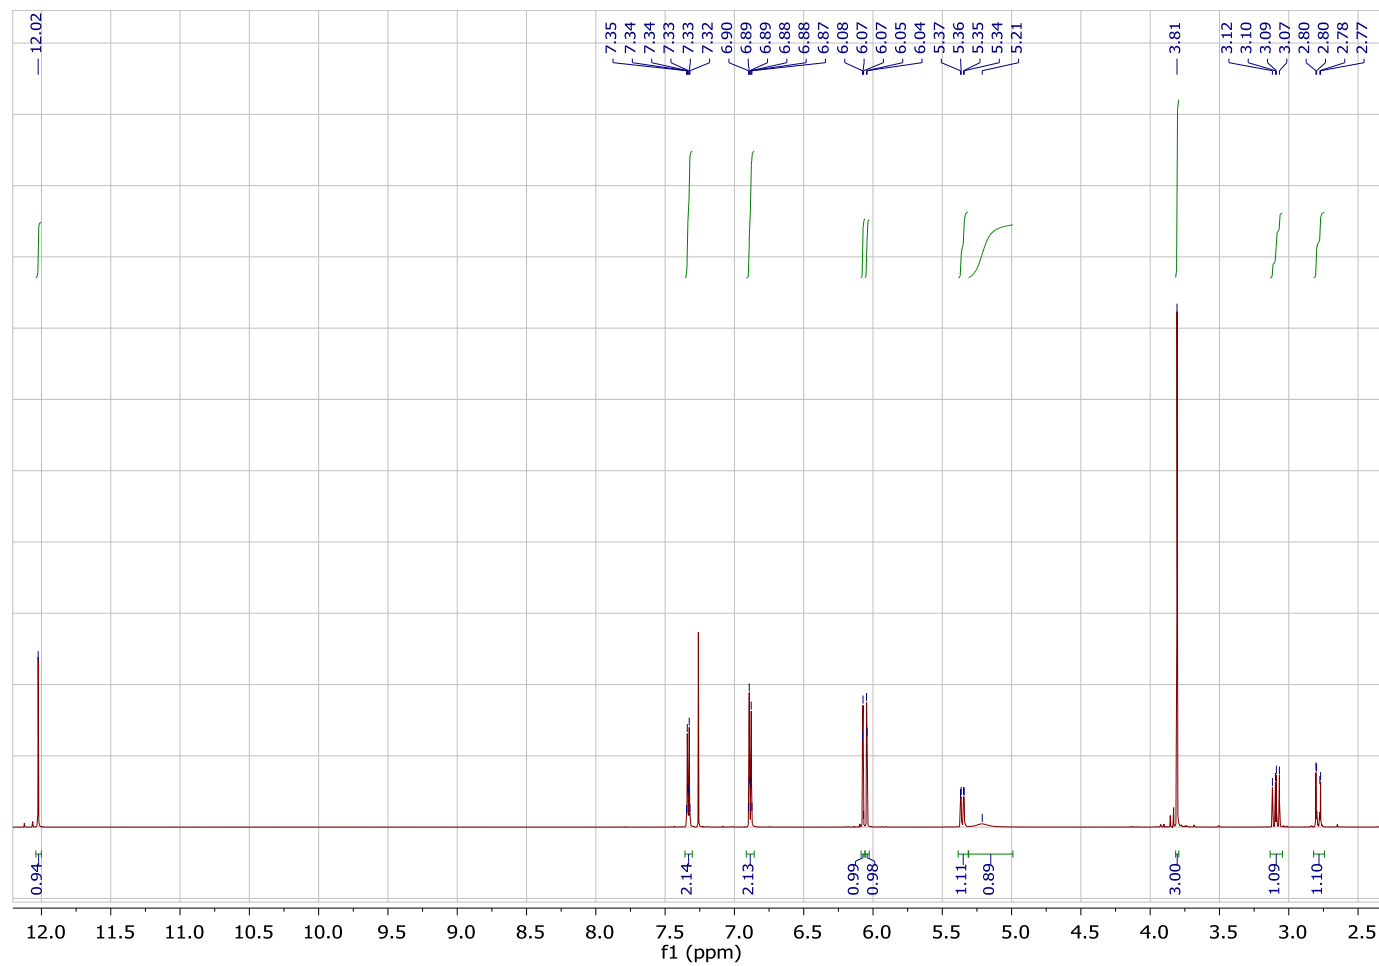

Figure S1. <sup>1</sup>H-NMR (600 MHz, CDCl<sub>3</sub>) spectrum of compound 1a

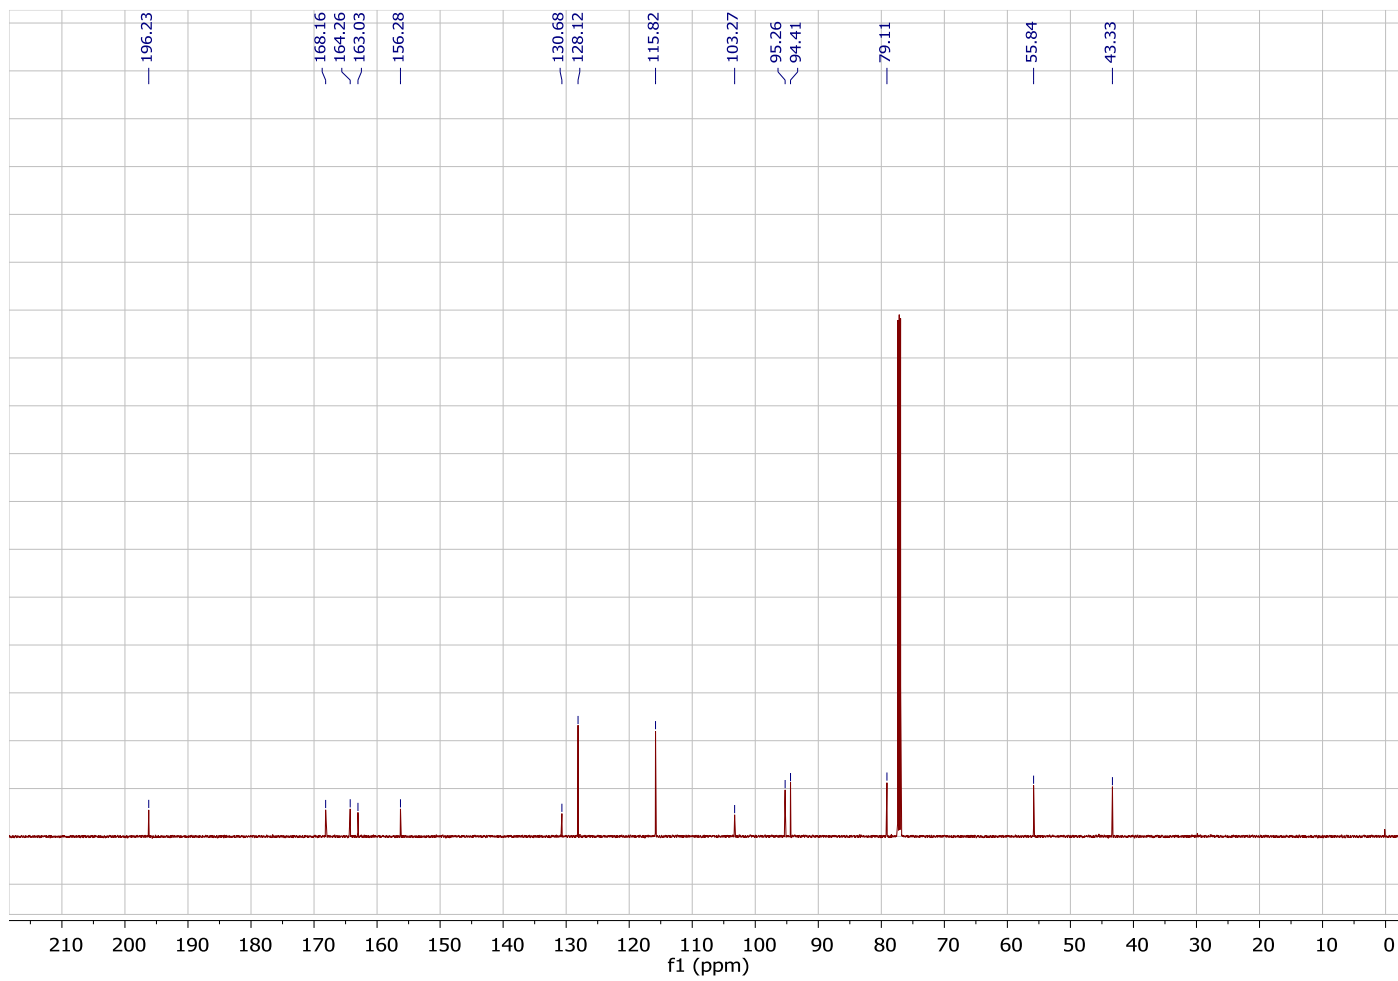

Figure S2. <sup>13</sup>C-NMR (150 MHz, CDCl<sub>3</sub>) spectrum of compound **1a**

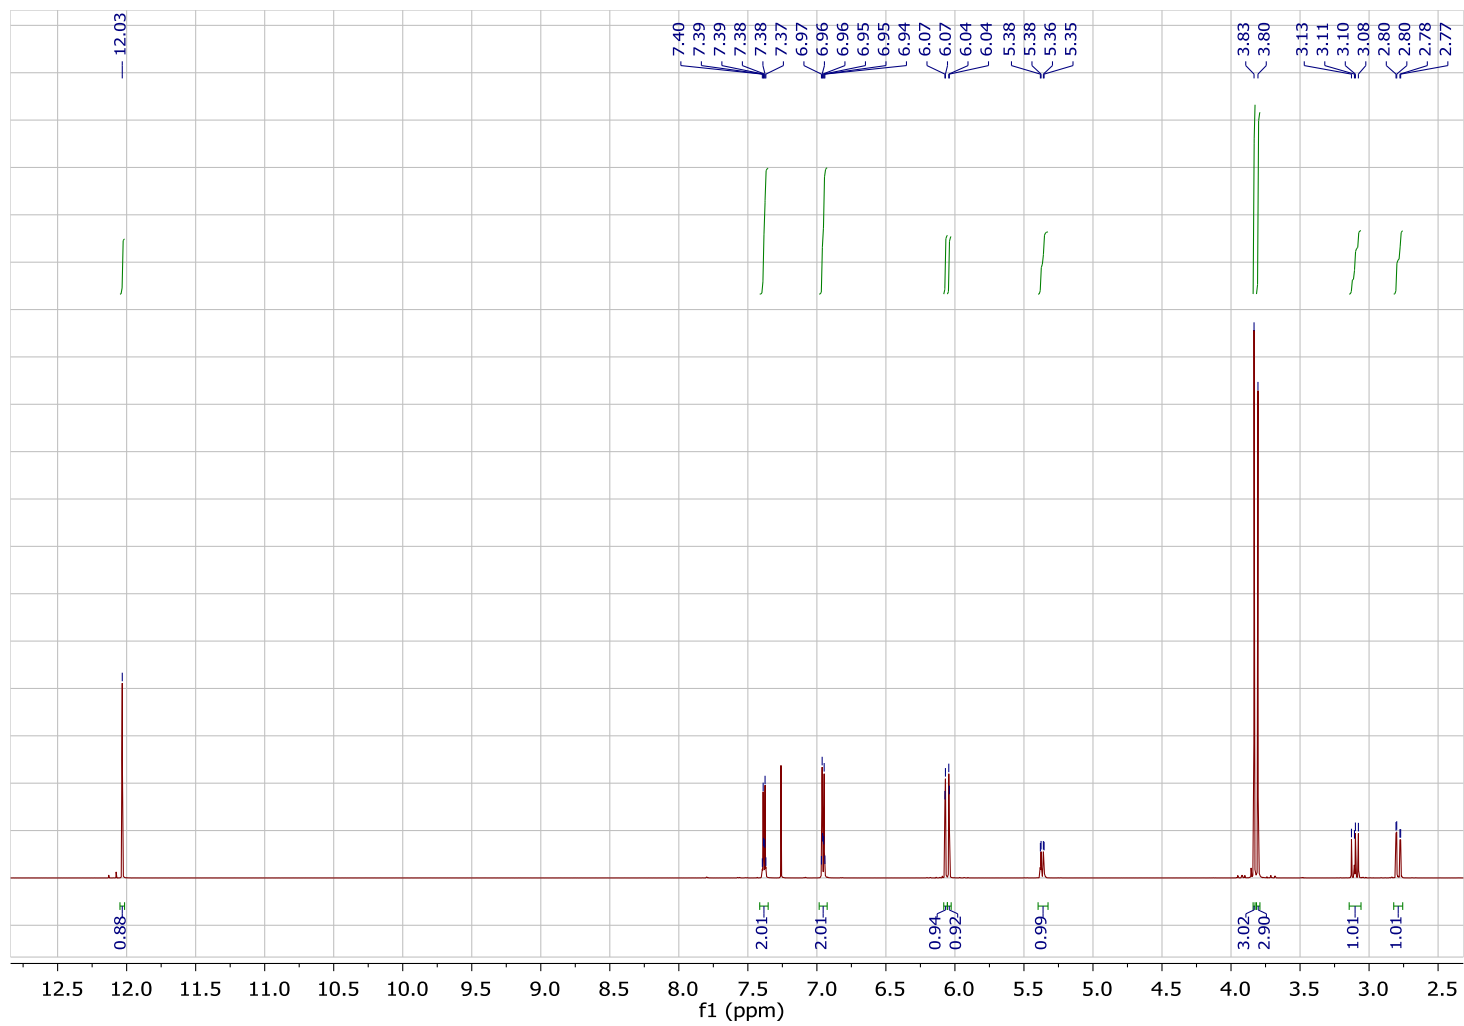

Figure S3. <sup>1</sup>H-NMR (600 MHz, CDCl<sub>3</sub>) spectrum of compound 2a

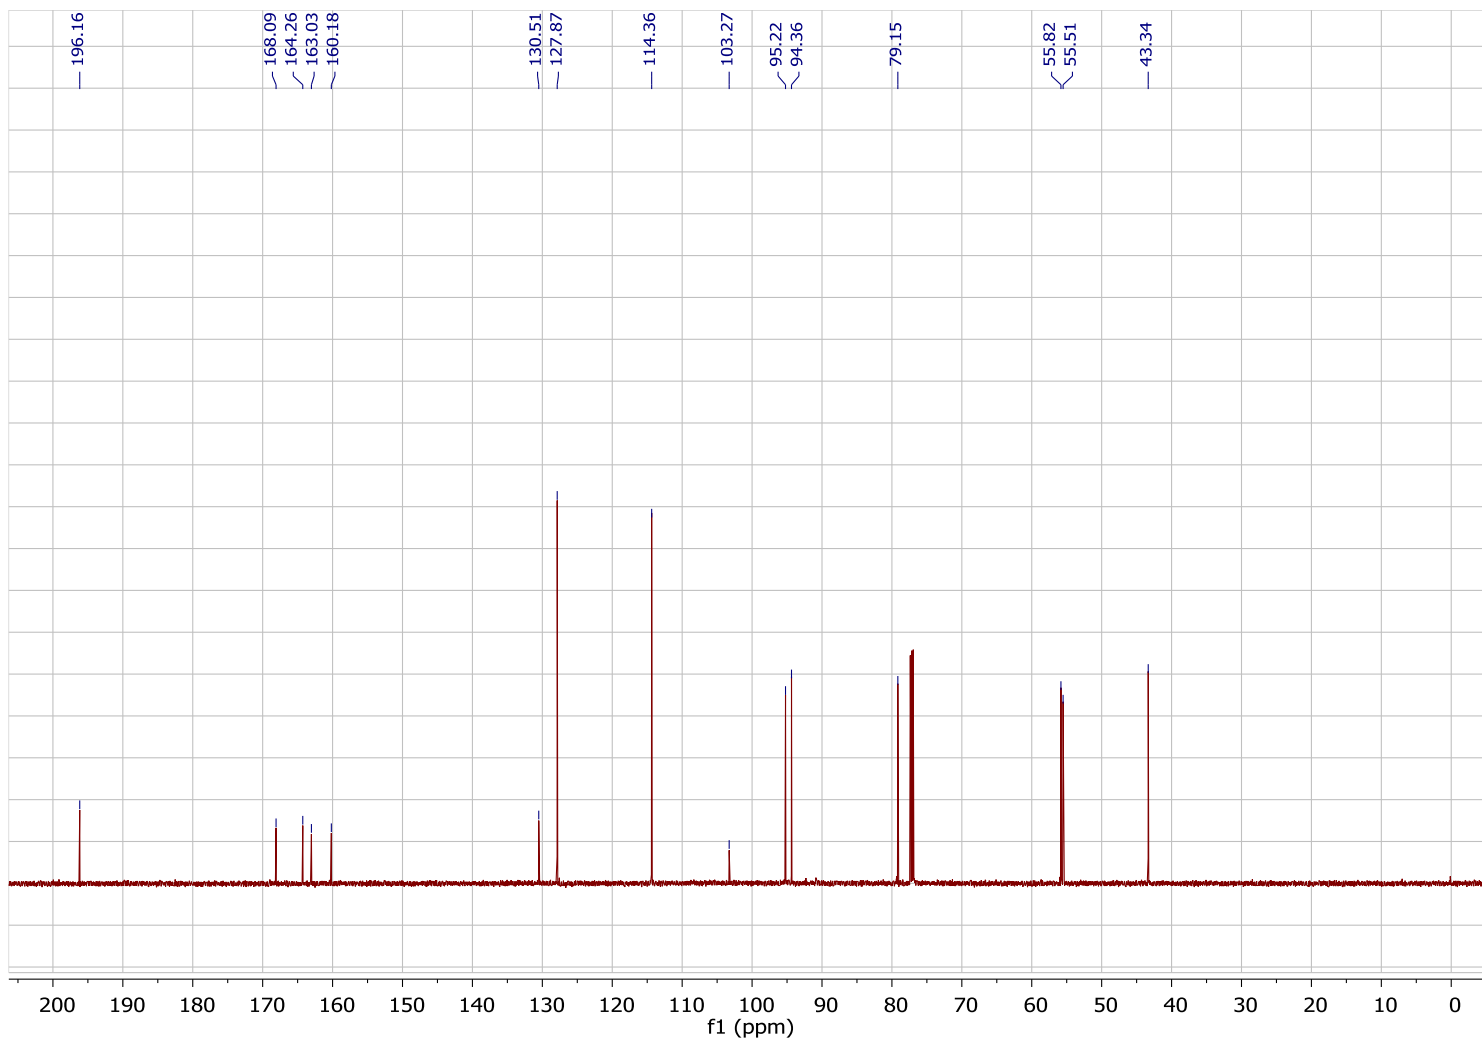

Figure S4. <sup>13</sup>C-NMR (150 MHz, CDCl<sub>3</sub>) spectrum of compound 2a

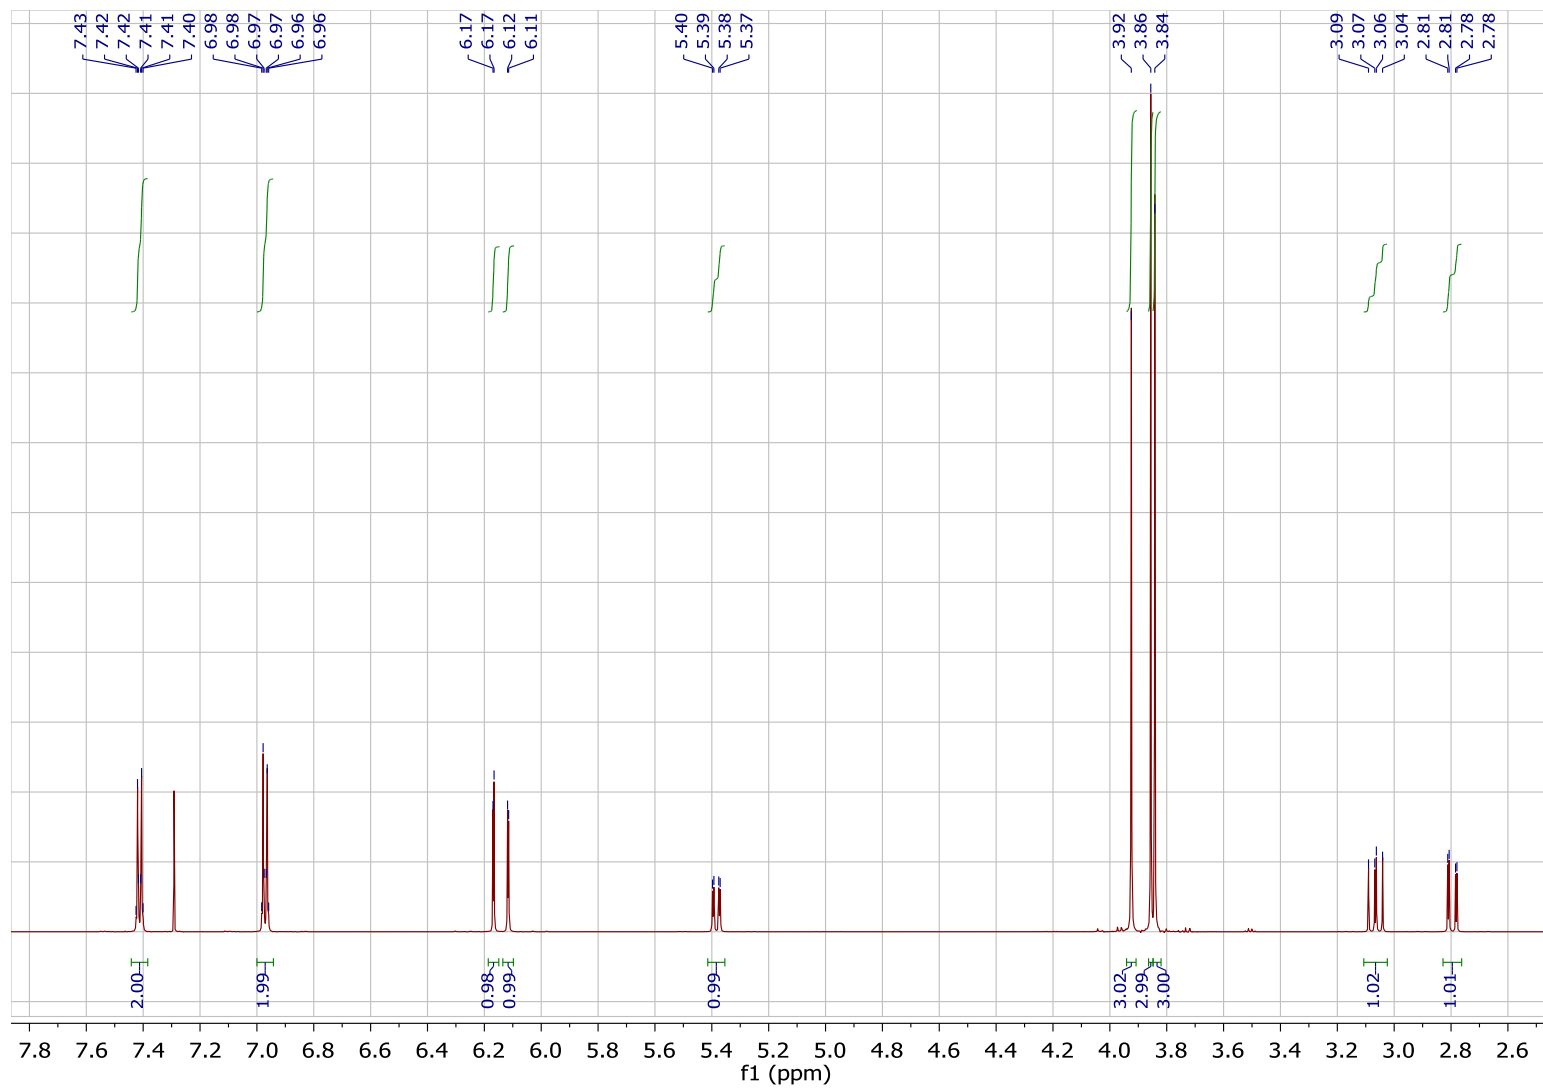

Figure S5. <sup>1</sup>H-NMR (600 MHz, CDCl<sub>3</sub>) spectrum of compound 3a

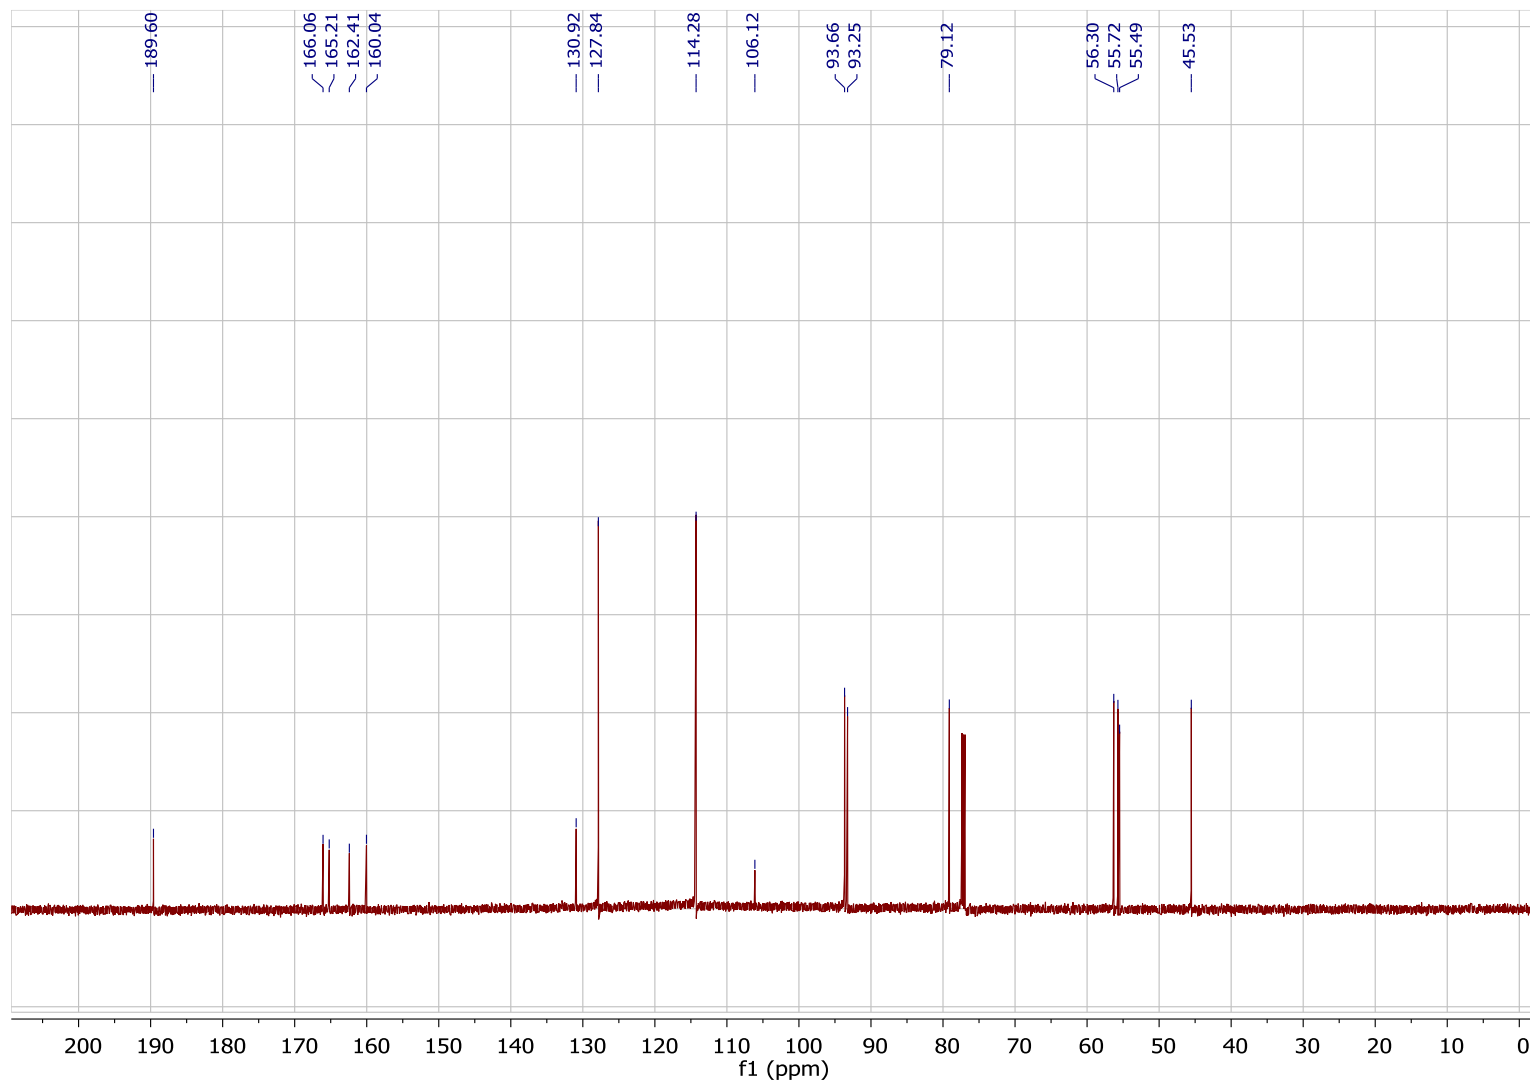

Figure S6. <sup>13</sup>C-NMR (150 MHz, CDCl<sub>3</sub>) spectrum of compound 3a

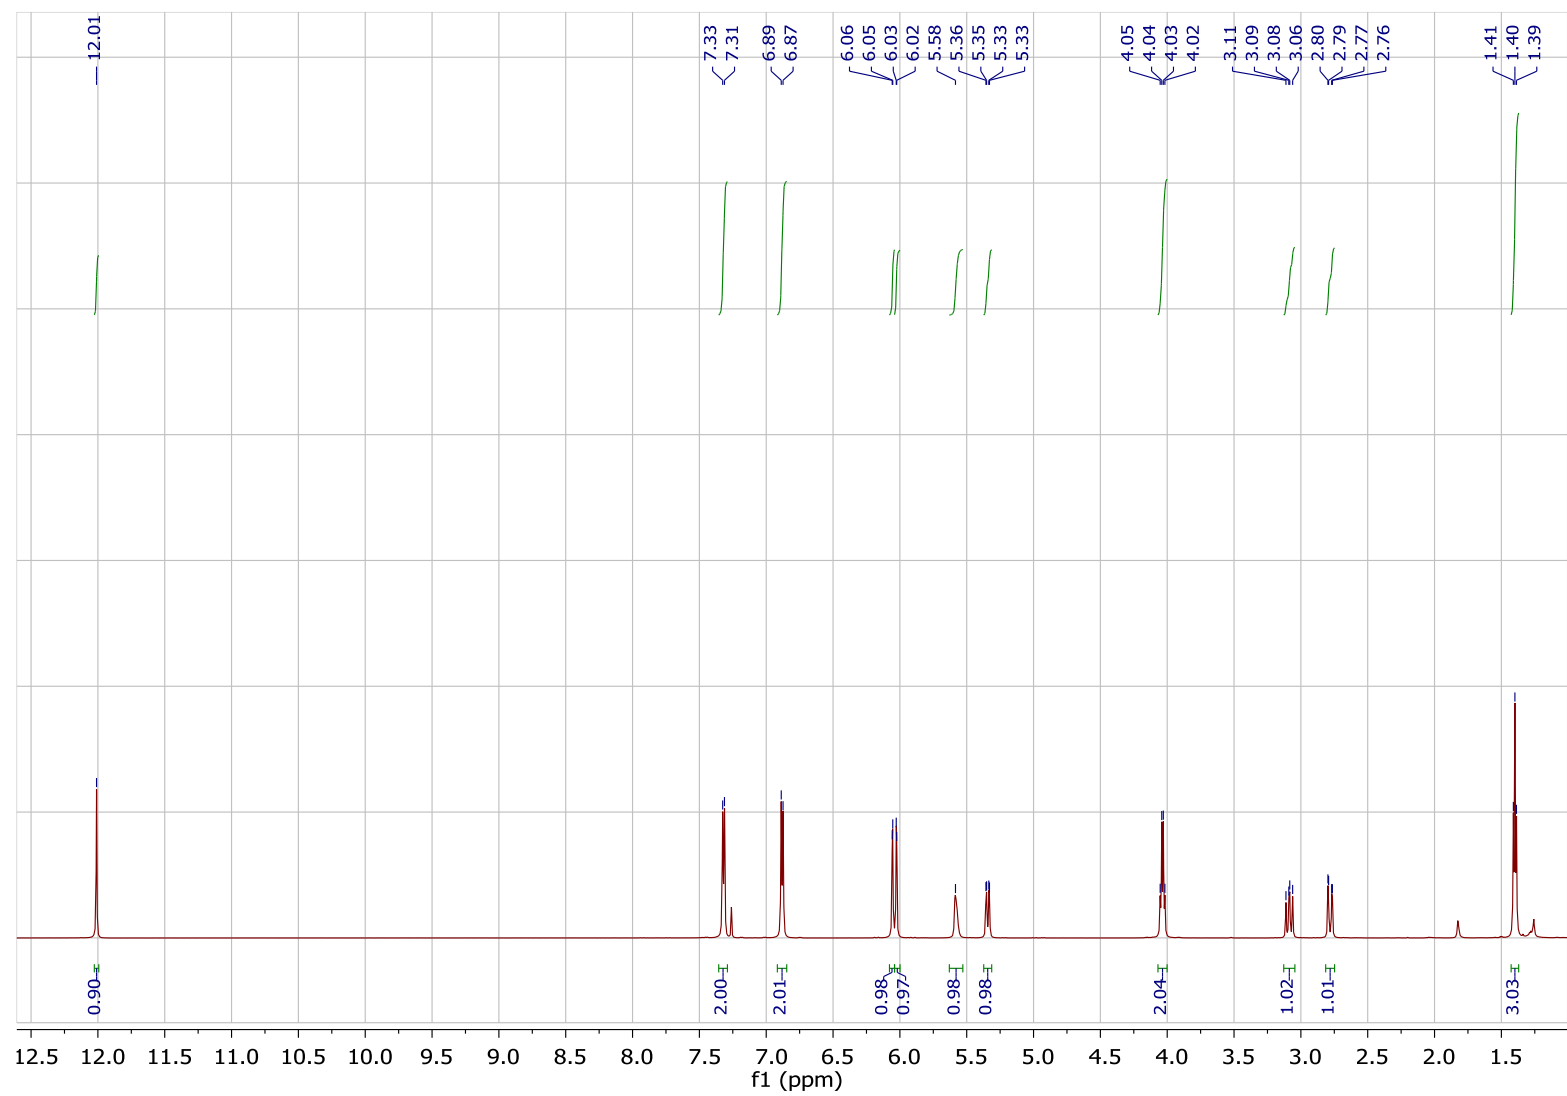

Figure S7. <sup>1</sup>H-NMR (600 MHz, CDCl<sub>3</sub>) spectrum of compound 4a

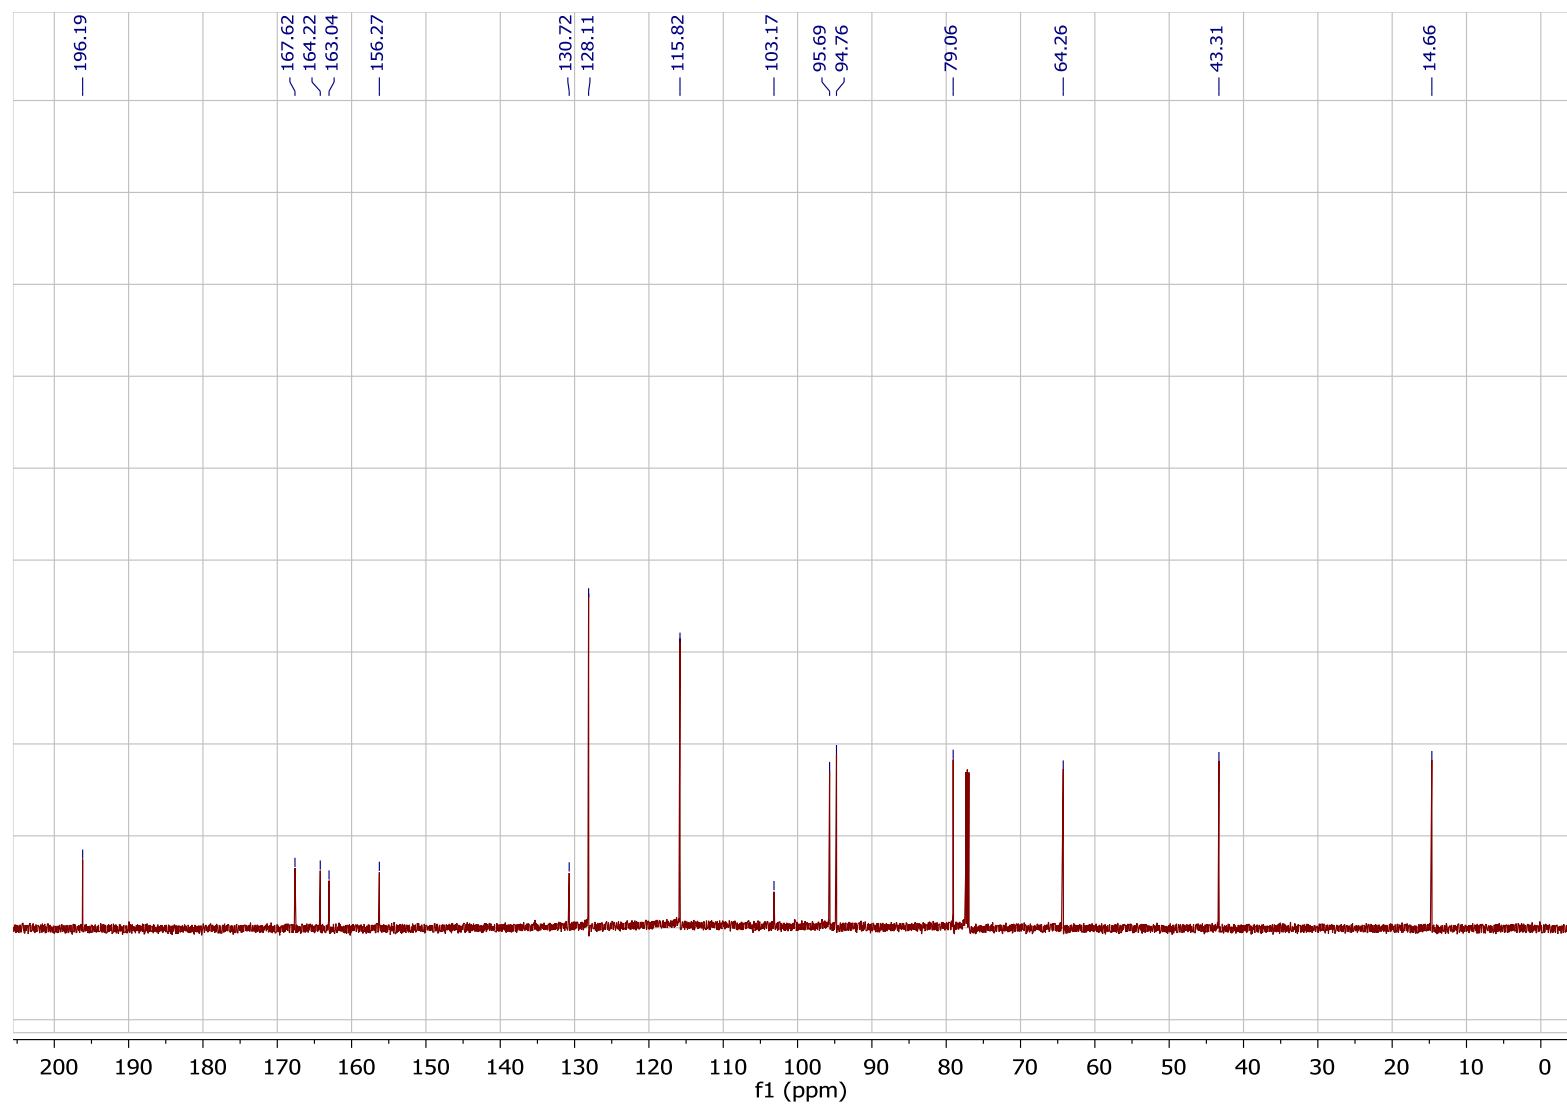

Figure S8. <sup>13</sup>C-NMR (150 MHz, CDCl<sub>3</sub>) spectrum of compound 4a



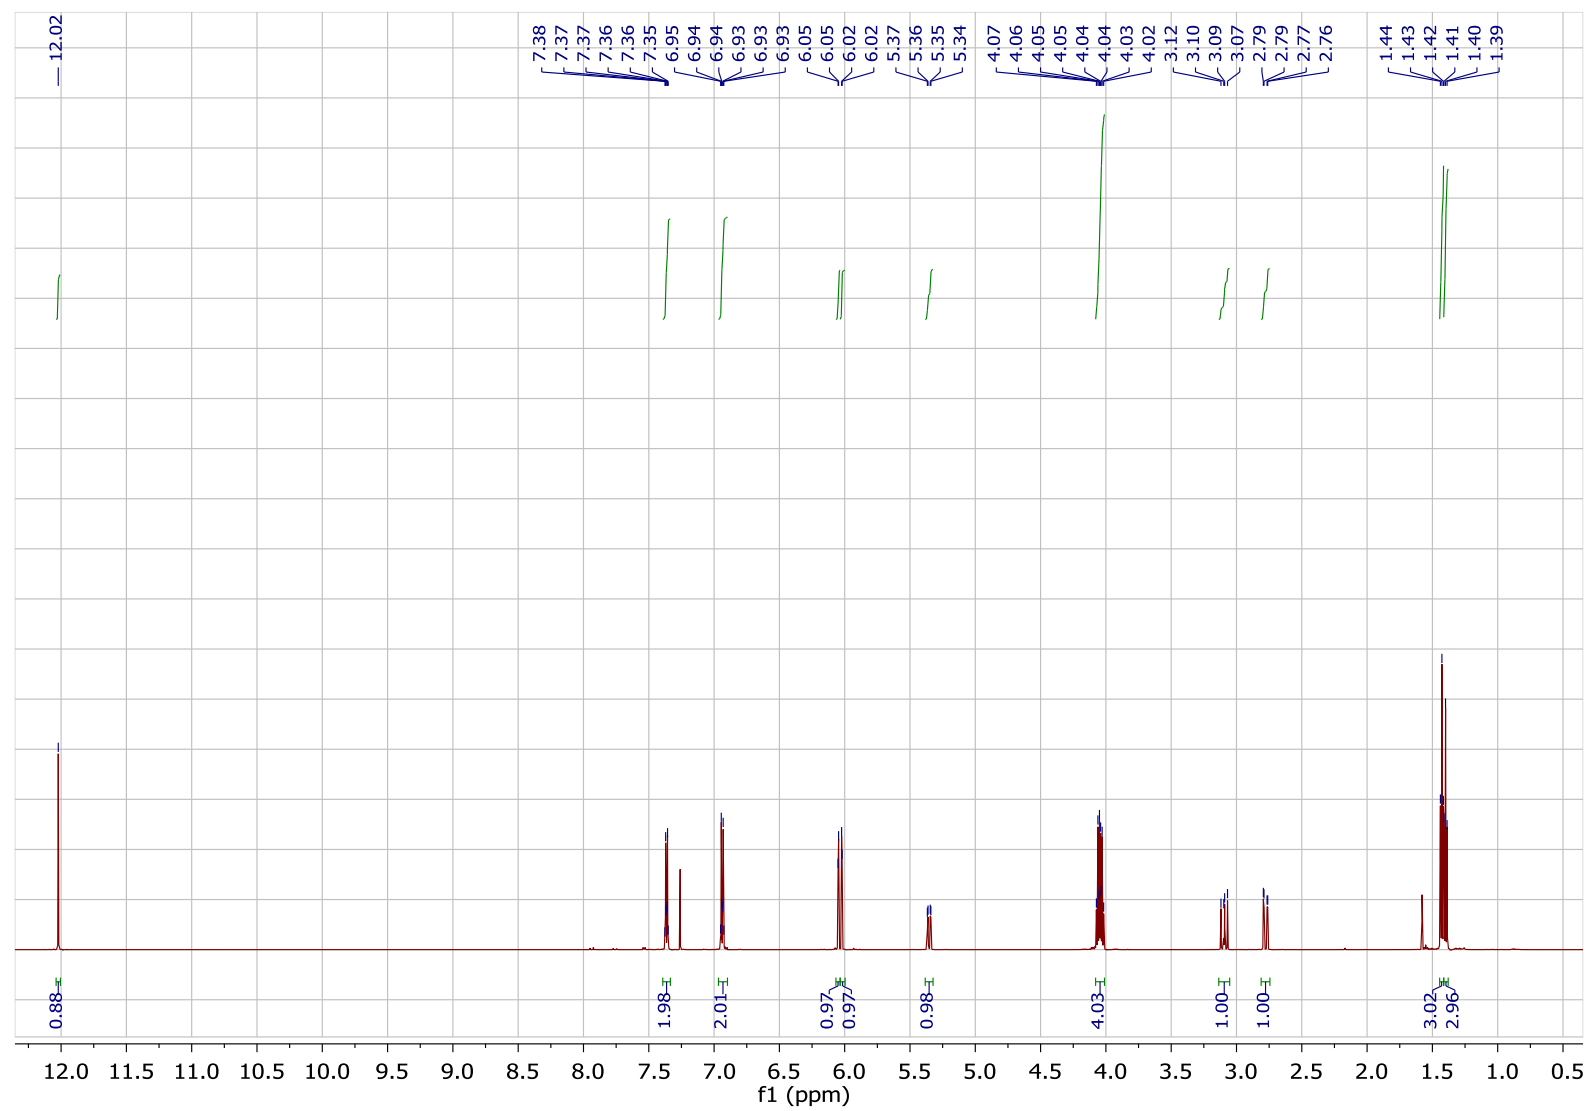

Figure S9. <sup>1</sup>H-NMR (600 MHz, CDCl<sub>3</sub>) spectrum of compound 5a

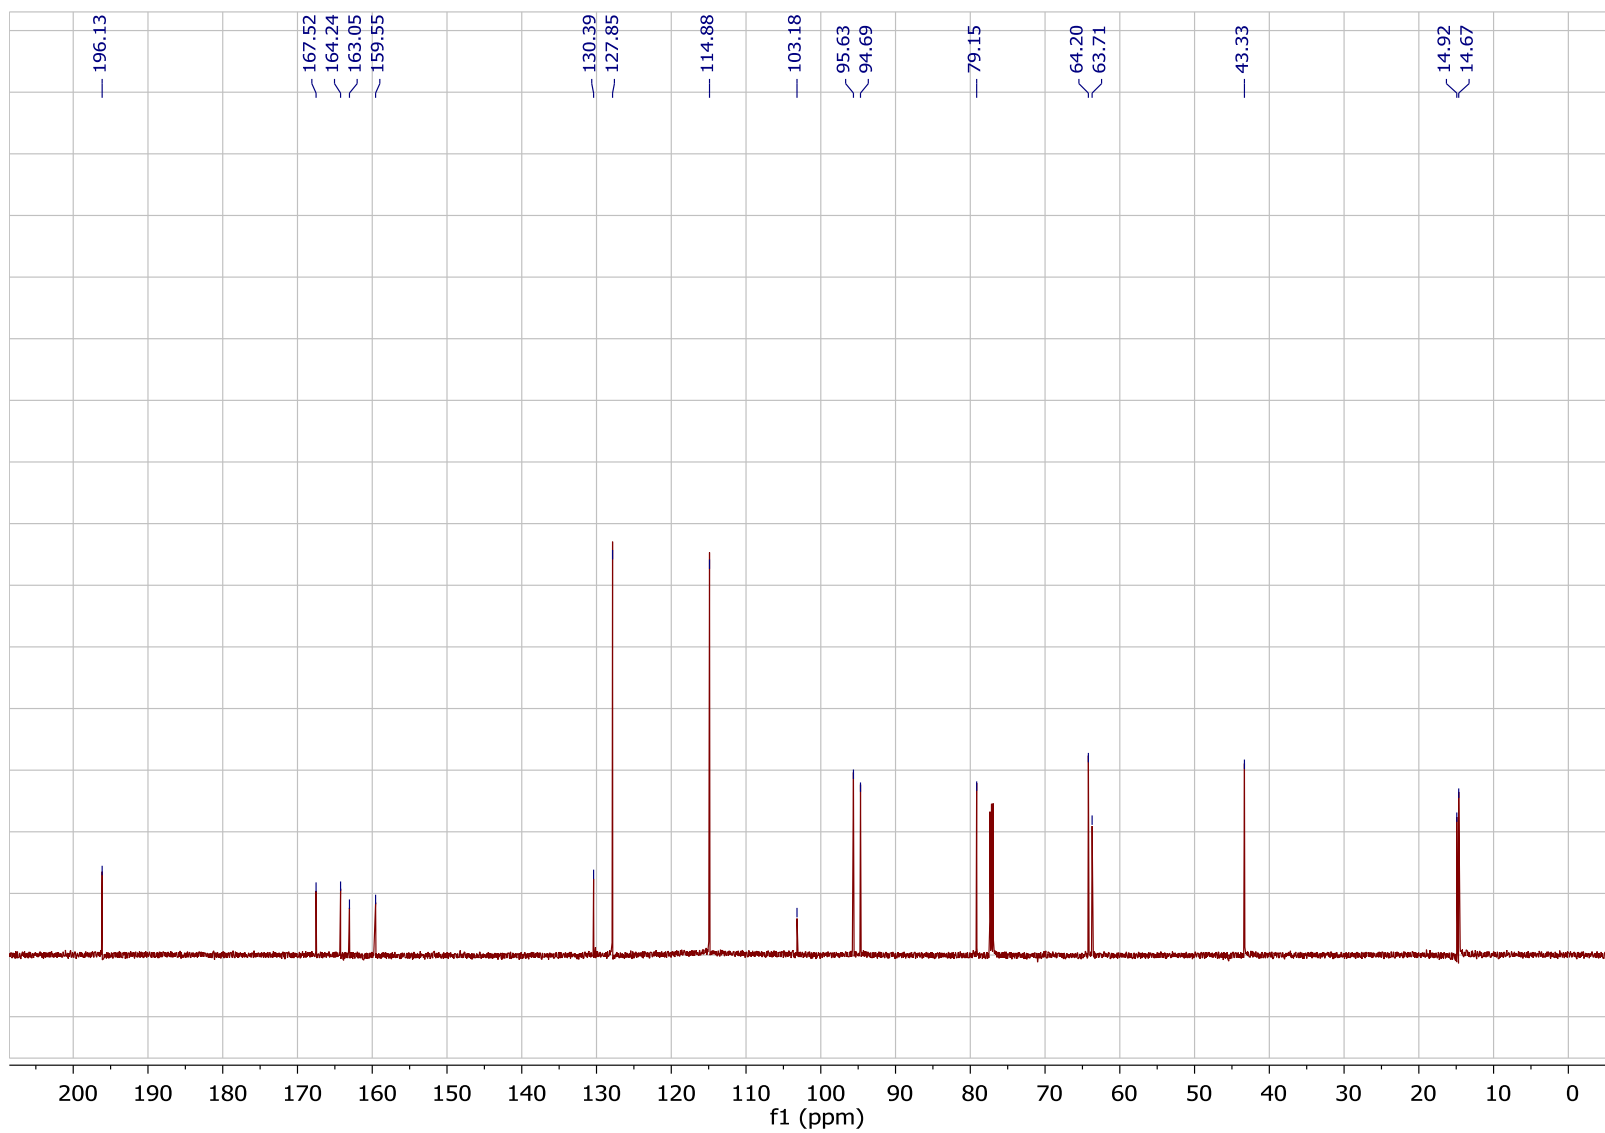

Figure S10. <sup>13</sup>C-NMR (150 MHz, CDCl<sub>3</sub>) spectrum of compound 5a

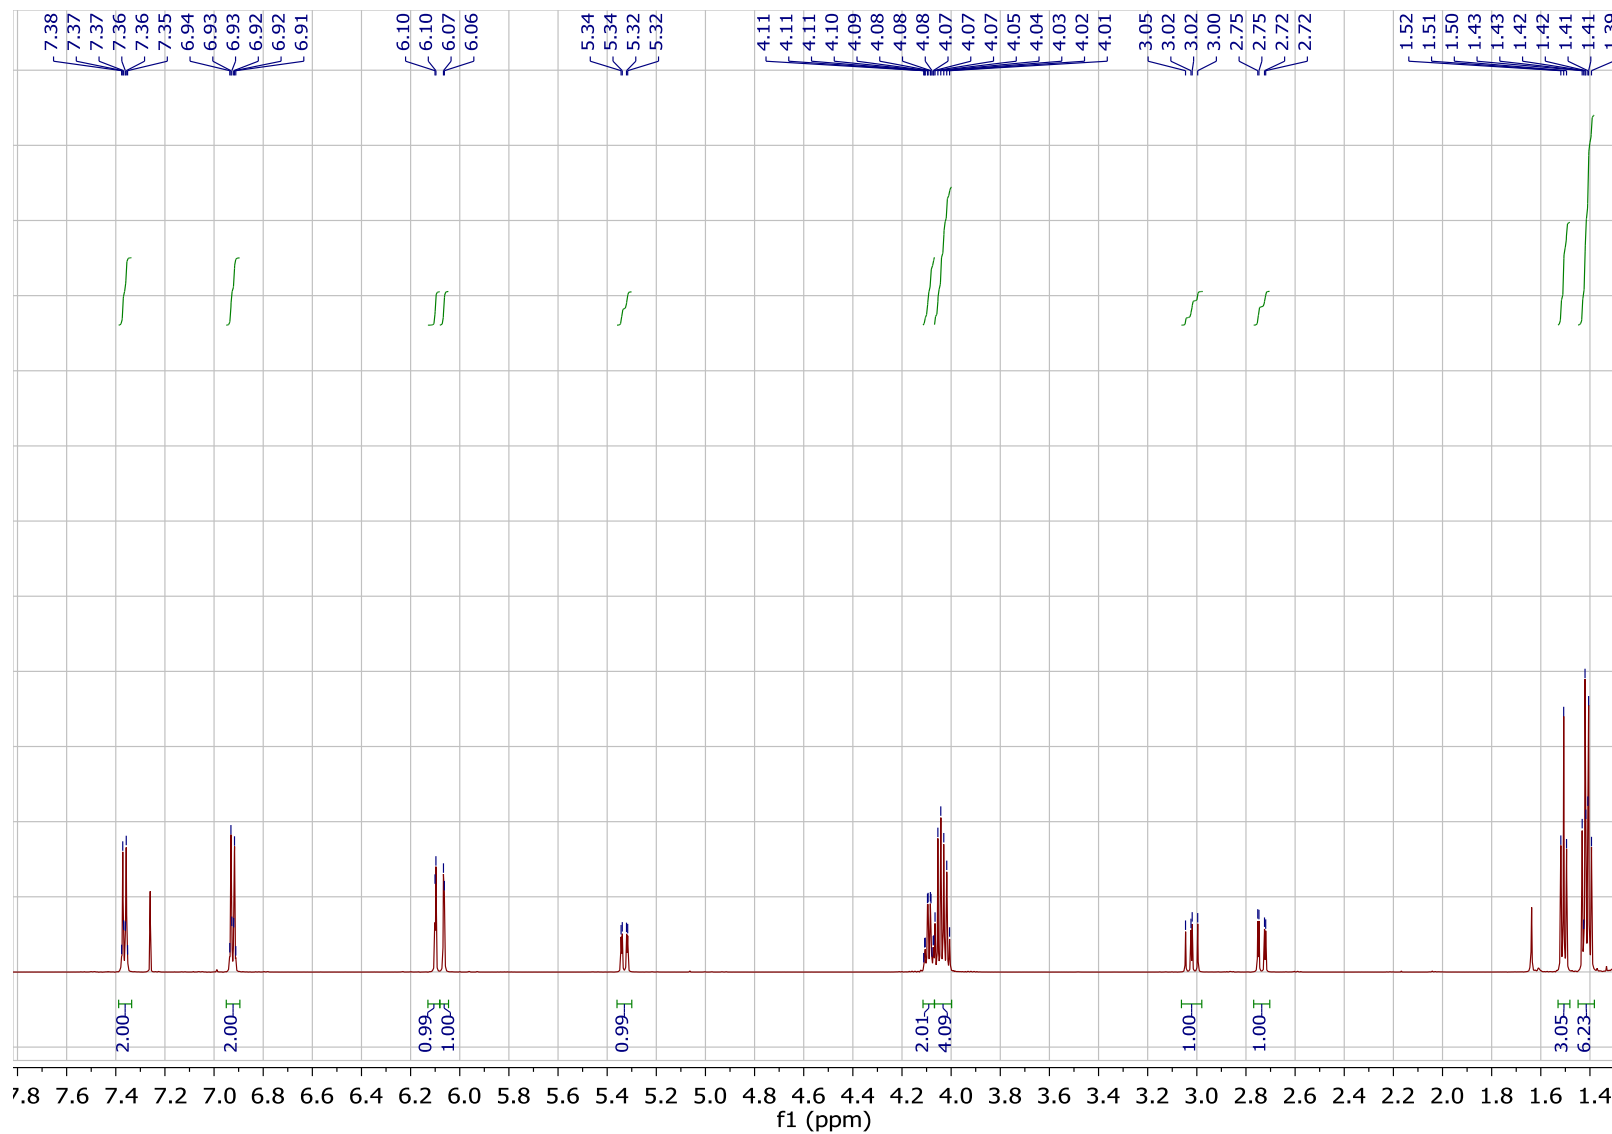

Figure S11. <sup>1</sup>H-NMR (600 MHz, CDCl<sub>3</sub>) spectrum of compound 6a

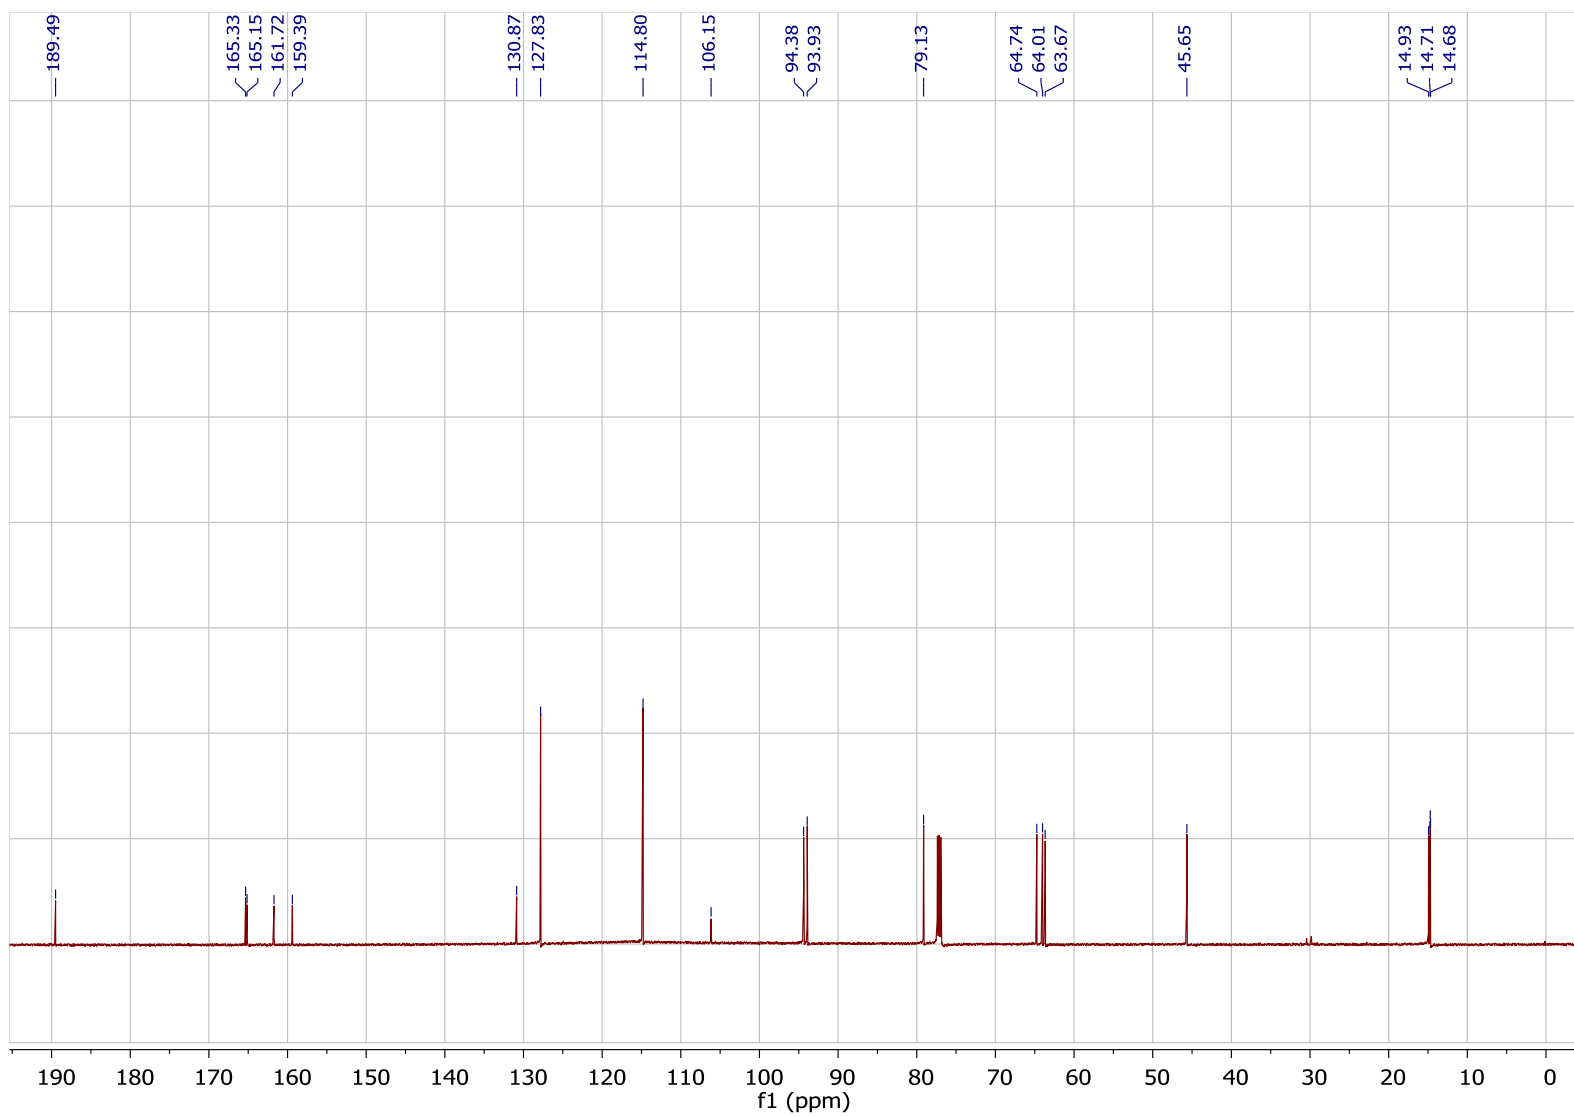

**Figure S12.** <sup>13</sup>C-NMR (150 MHz, CDCl<sub>3</sub>) spectrum of compound 6a

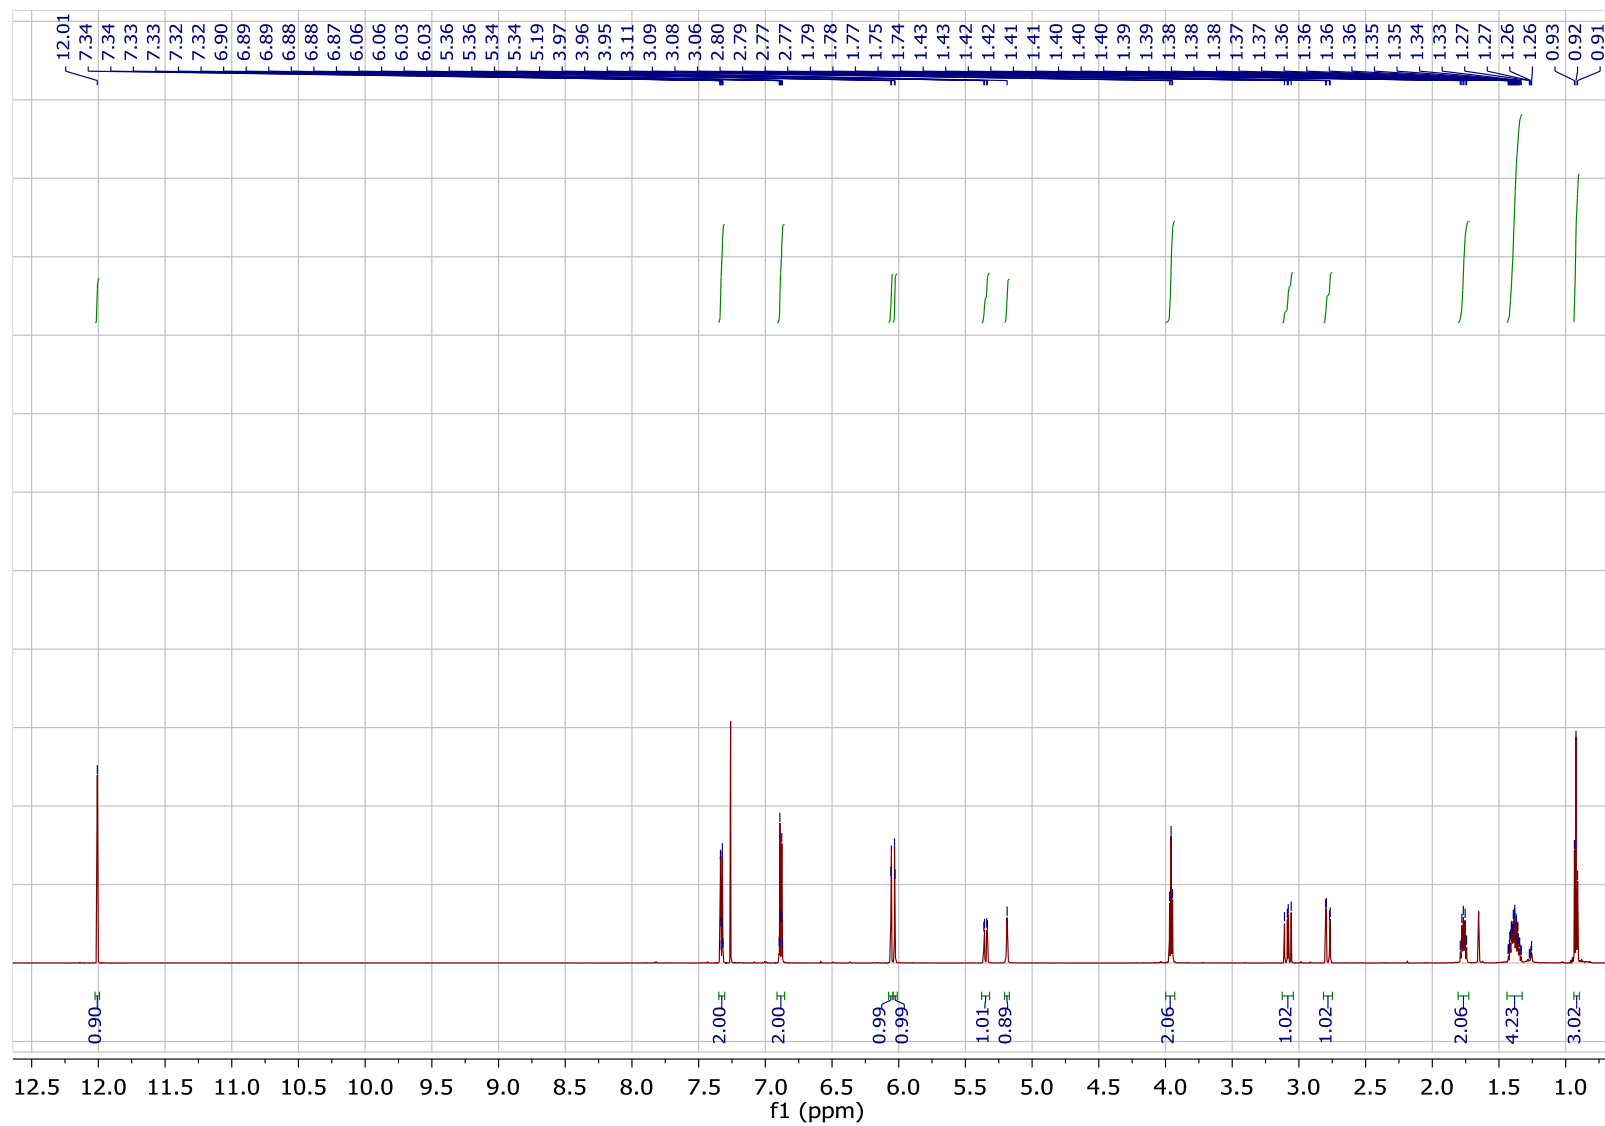

Figure S13. <sup>1</sup>H-NMR (600 MHz, CDCl<sub>3</sub>) spectrum of compound 7a

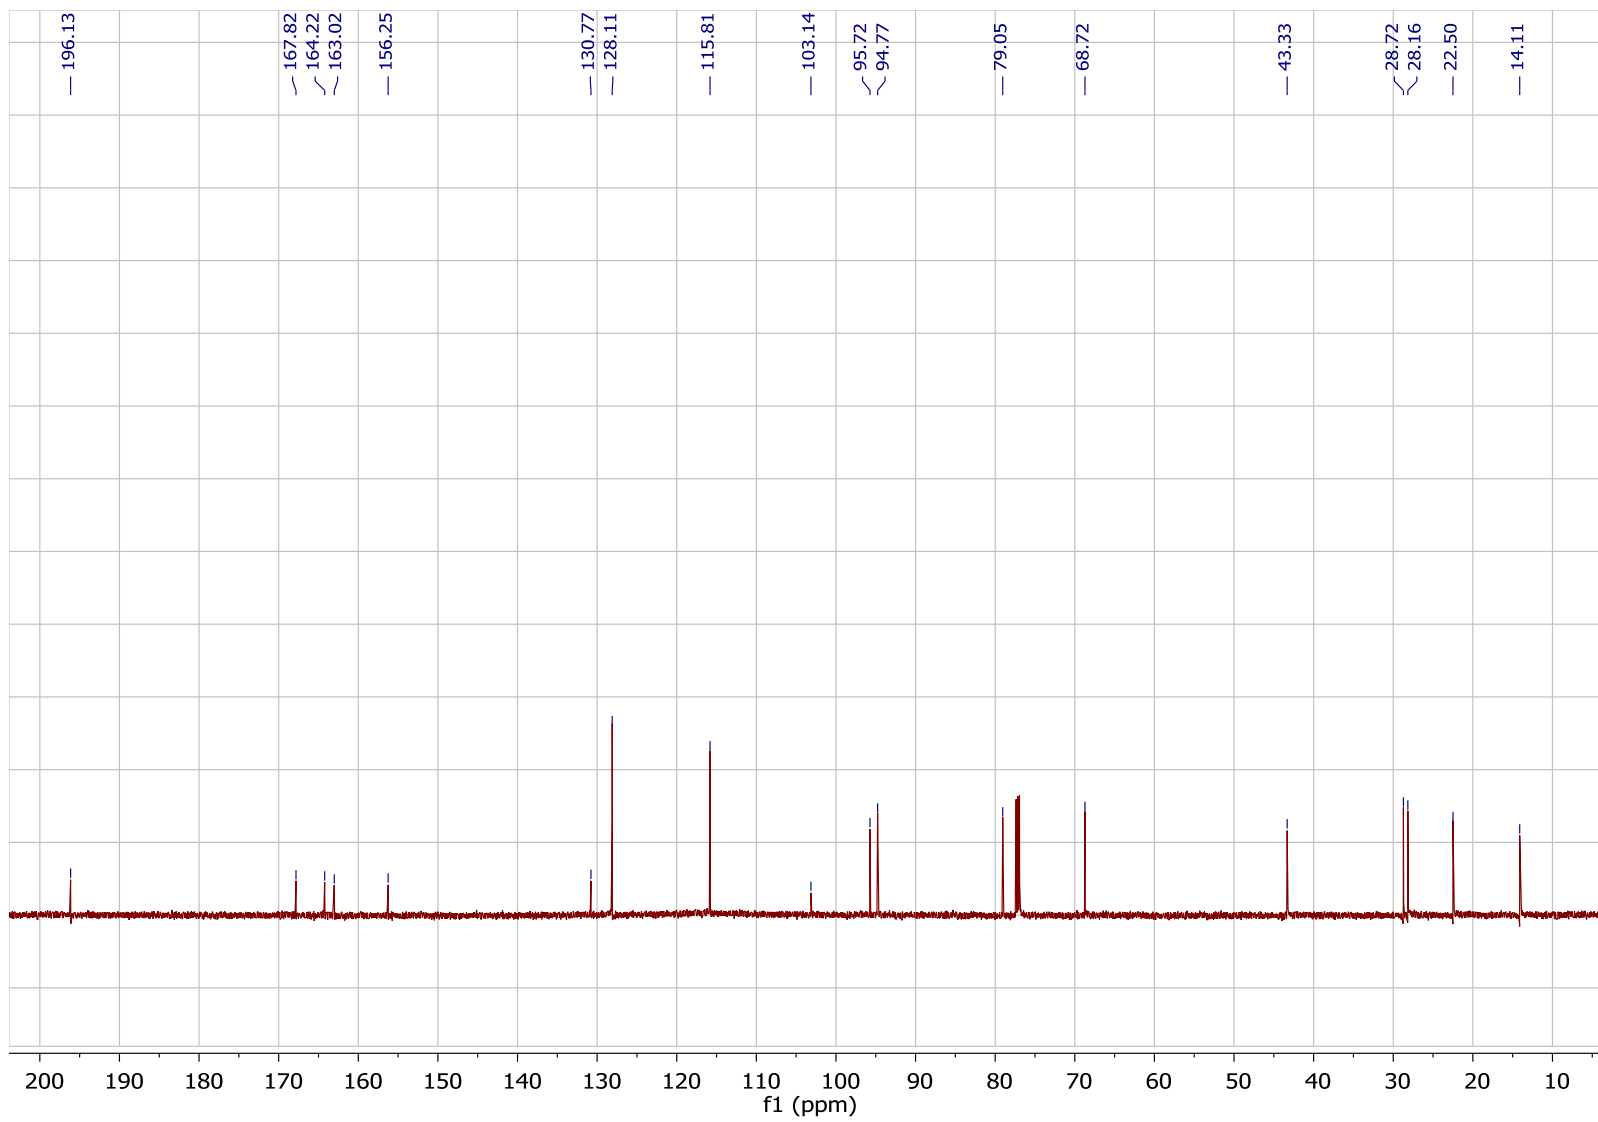

Figure S14. <sup>13</sup>C-NMR (150 MHz, CDCl<sub>3</sub>) spectrum of compound 7a

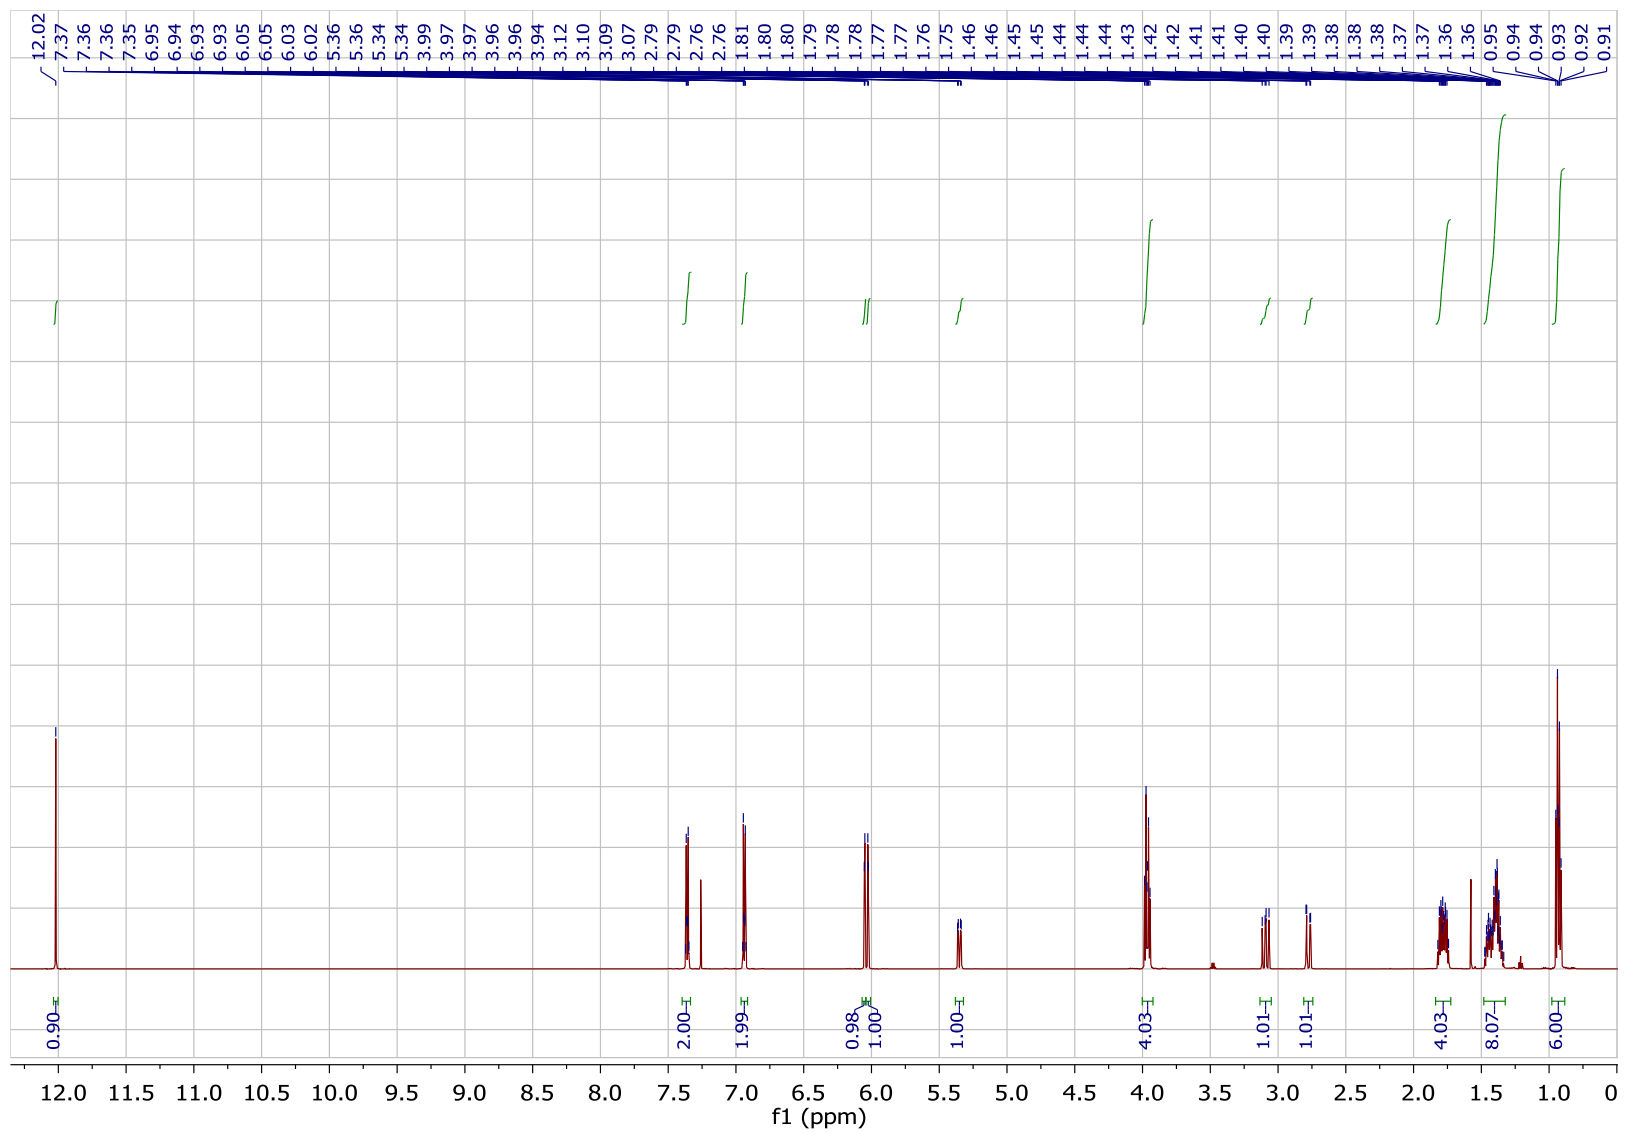

Figure S15. <sup>1</sup>H-NMR (600 MHz, CDCl<sub>3</sub>) spectrum of compound 8a

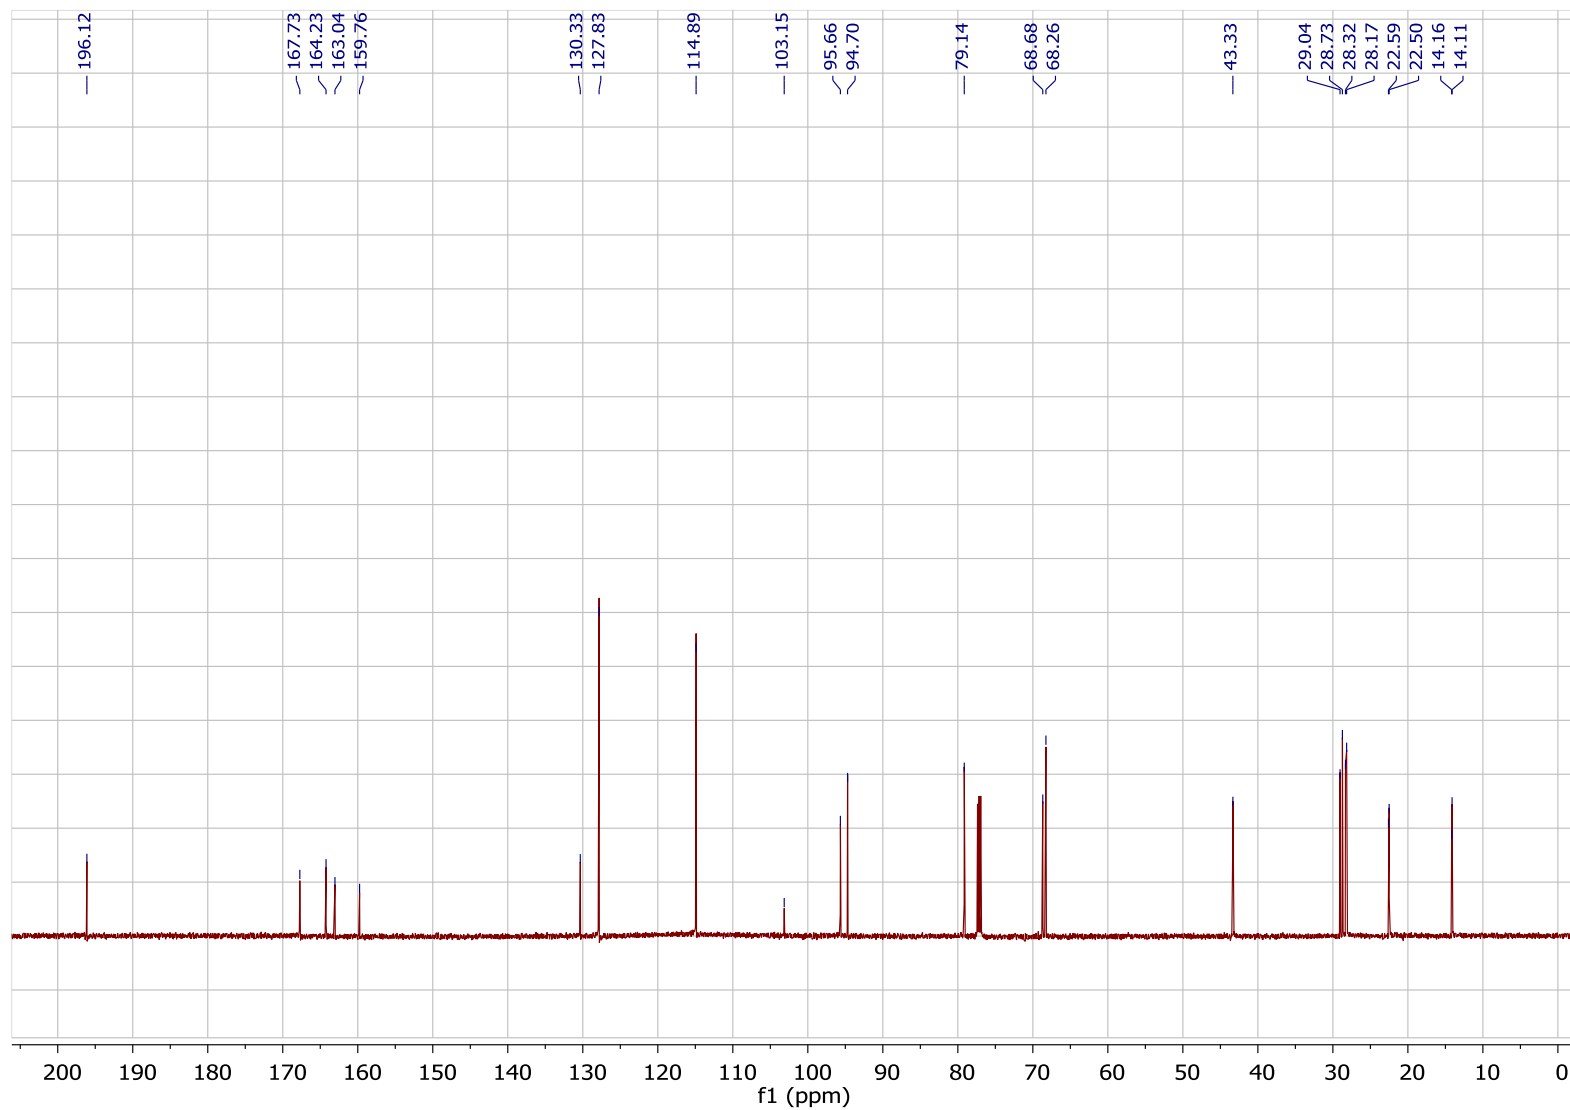

Figure S16. <sup>13</sup>C-NMR (150 MHz, CDCl<sub>3</sub>) spectrum of compound 8a



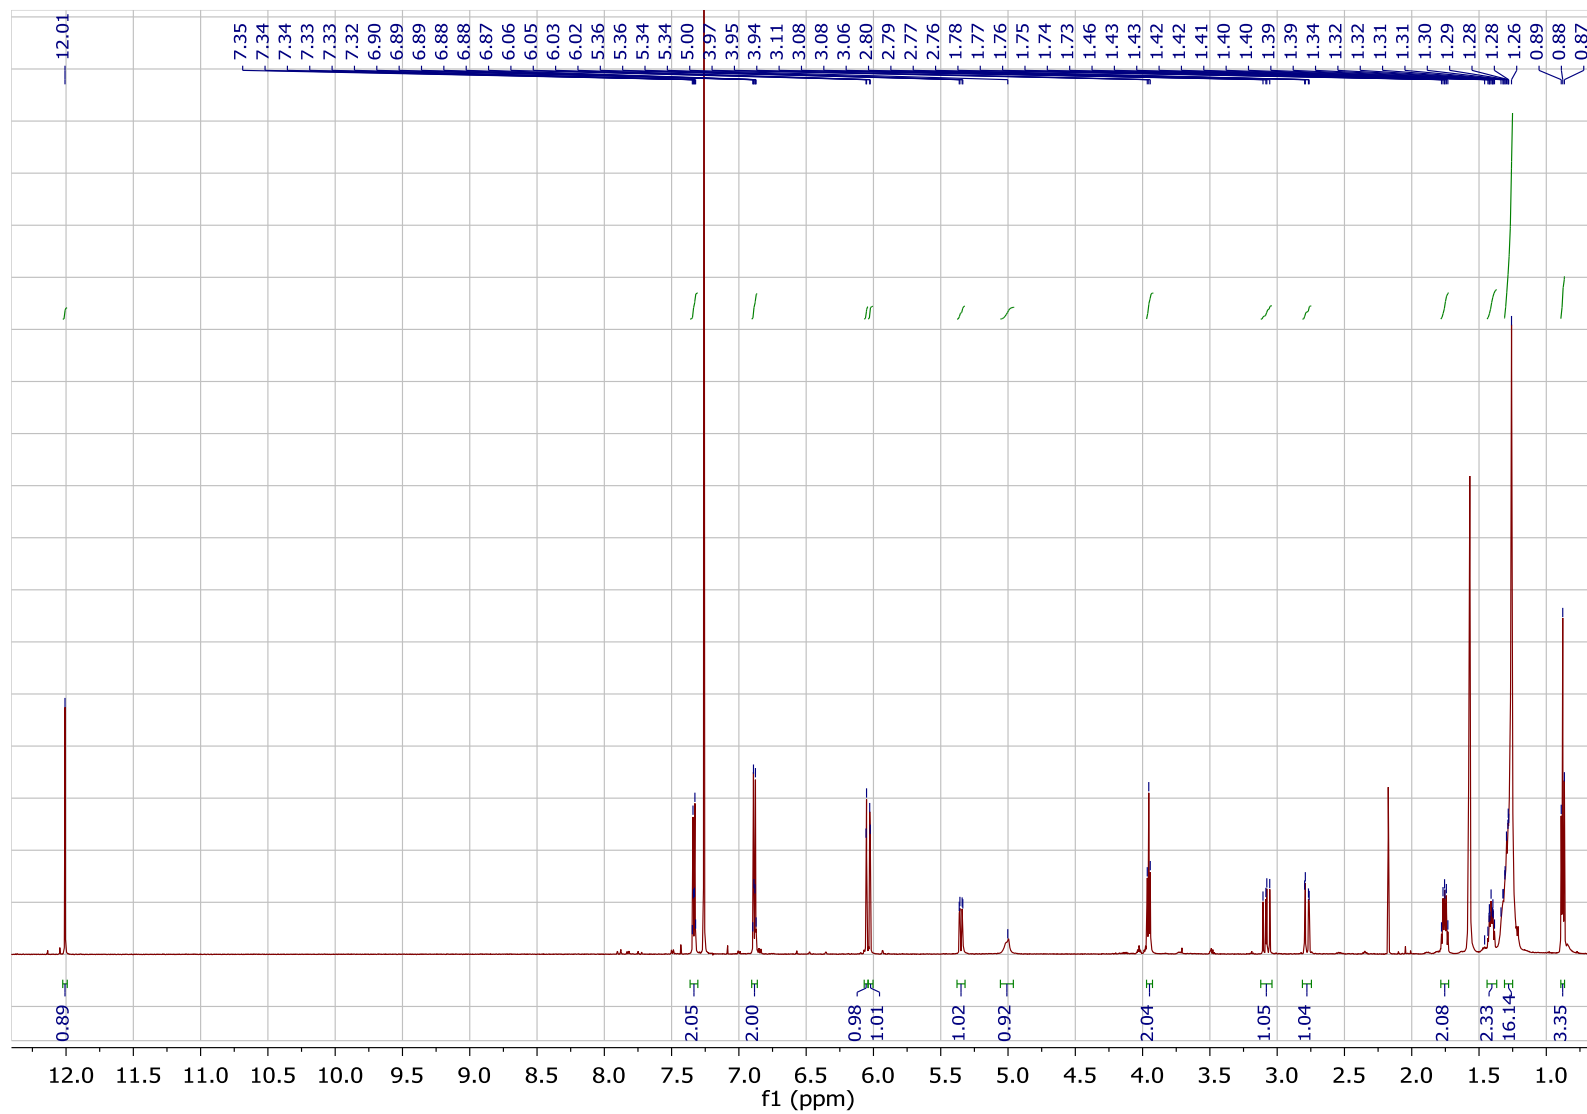

Figure S17. <sup>1</sup>H-NMR (600 MHz, CDCl<sub>3</sub>) spectrum of compound 9a

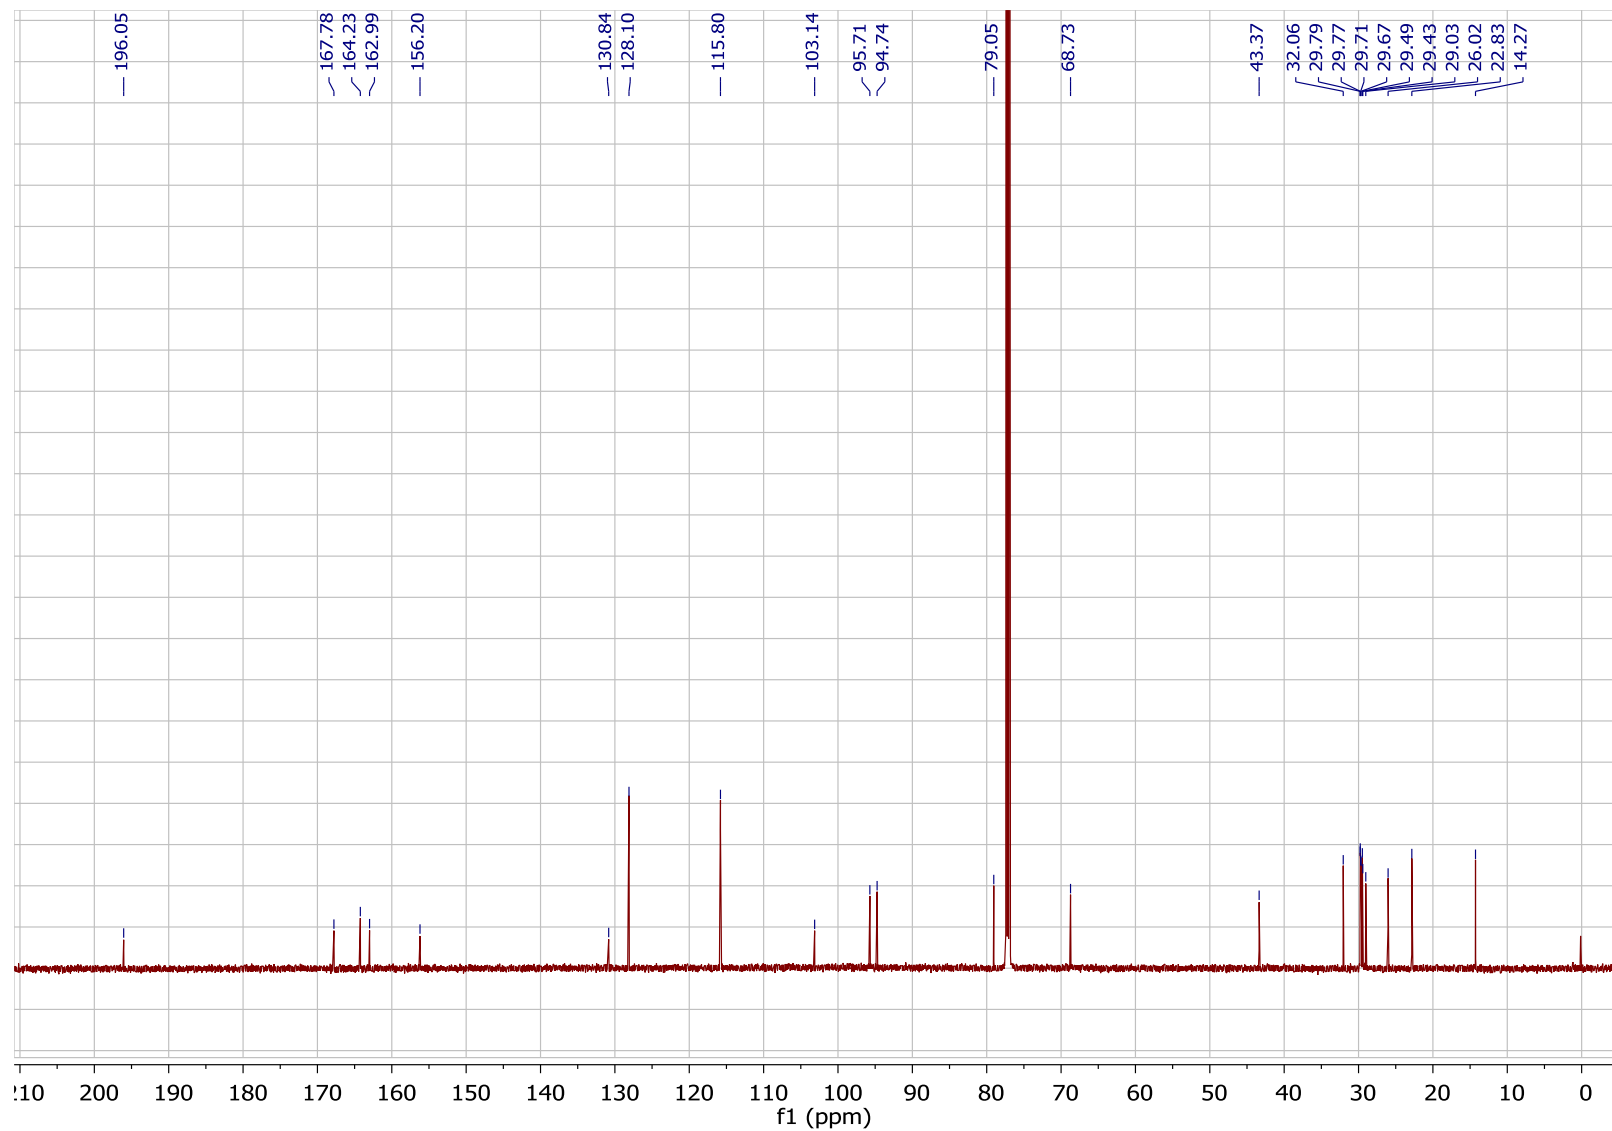

Figure S18. <sup>13</sup>C-NMR (150 MHz, CDCl<sub>3</sub>) spectrum of compound 9a

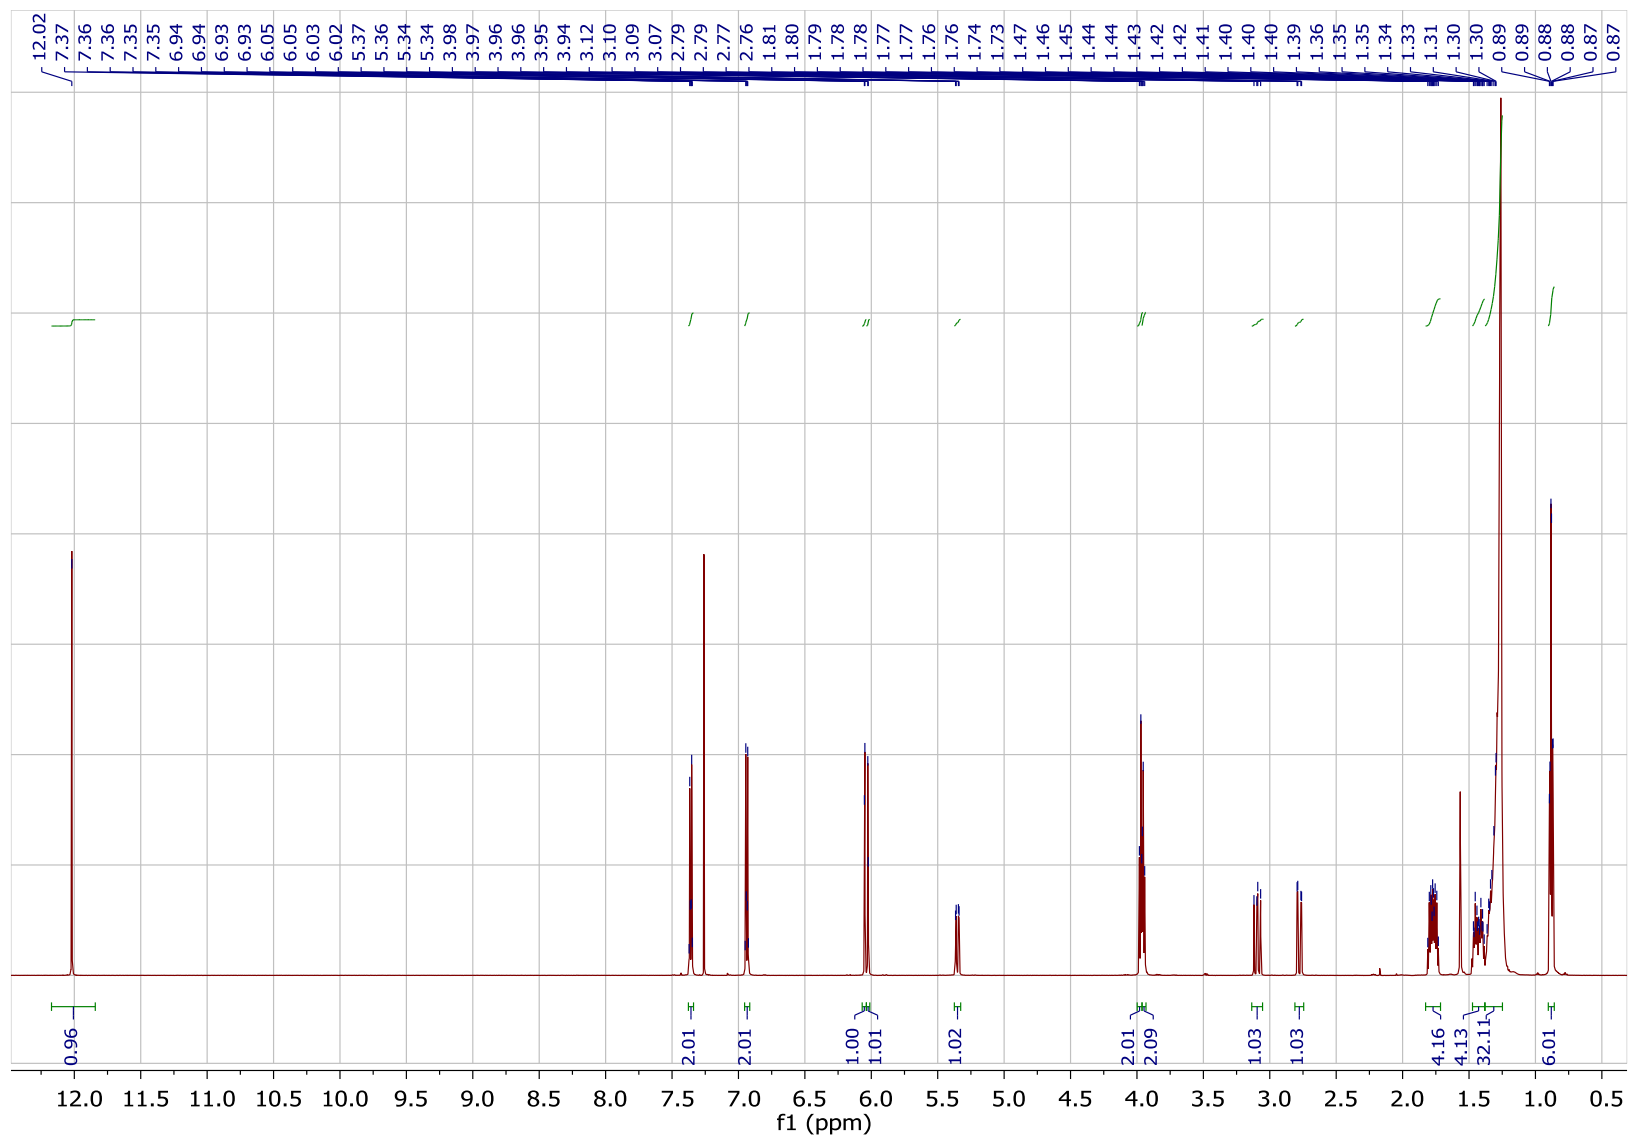

Figure S19. <sup>1</sup>H-NMR (600 MHz, CDCl<sub>3</sub>) spectrum of compound 10a

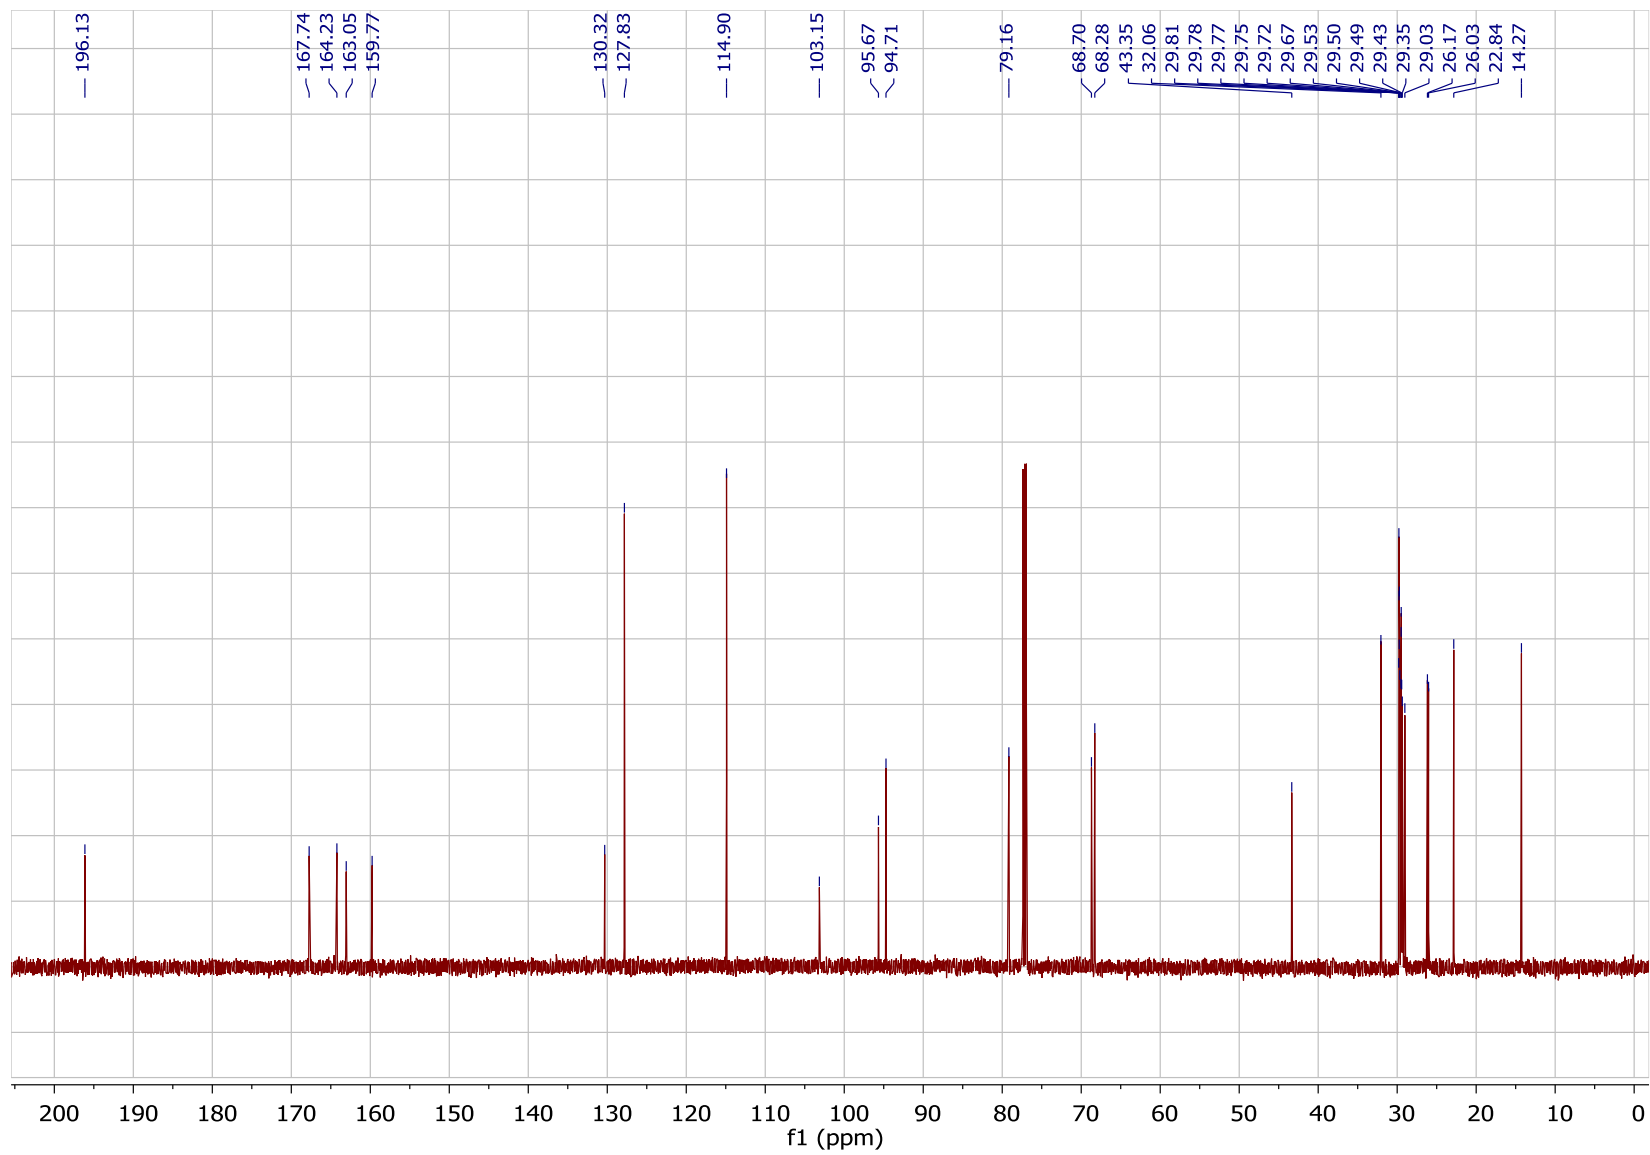

Figure S20.  $^{13}\text{C}$ -NMR (150 MHz,  $\text{CDCl}_3$ ) spectrum of compound 10a

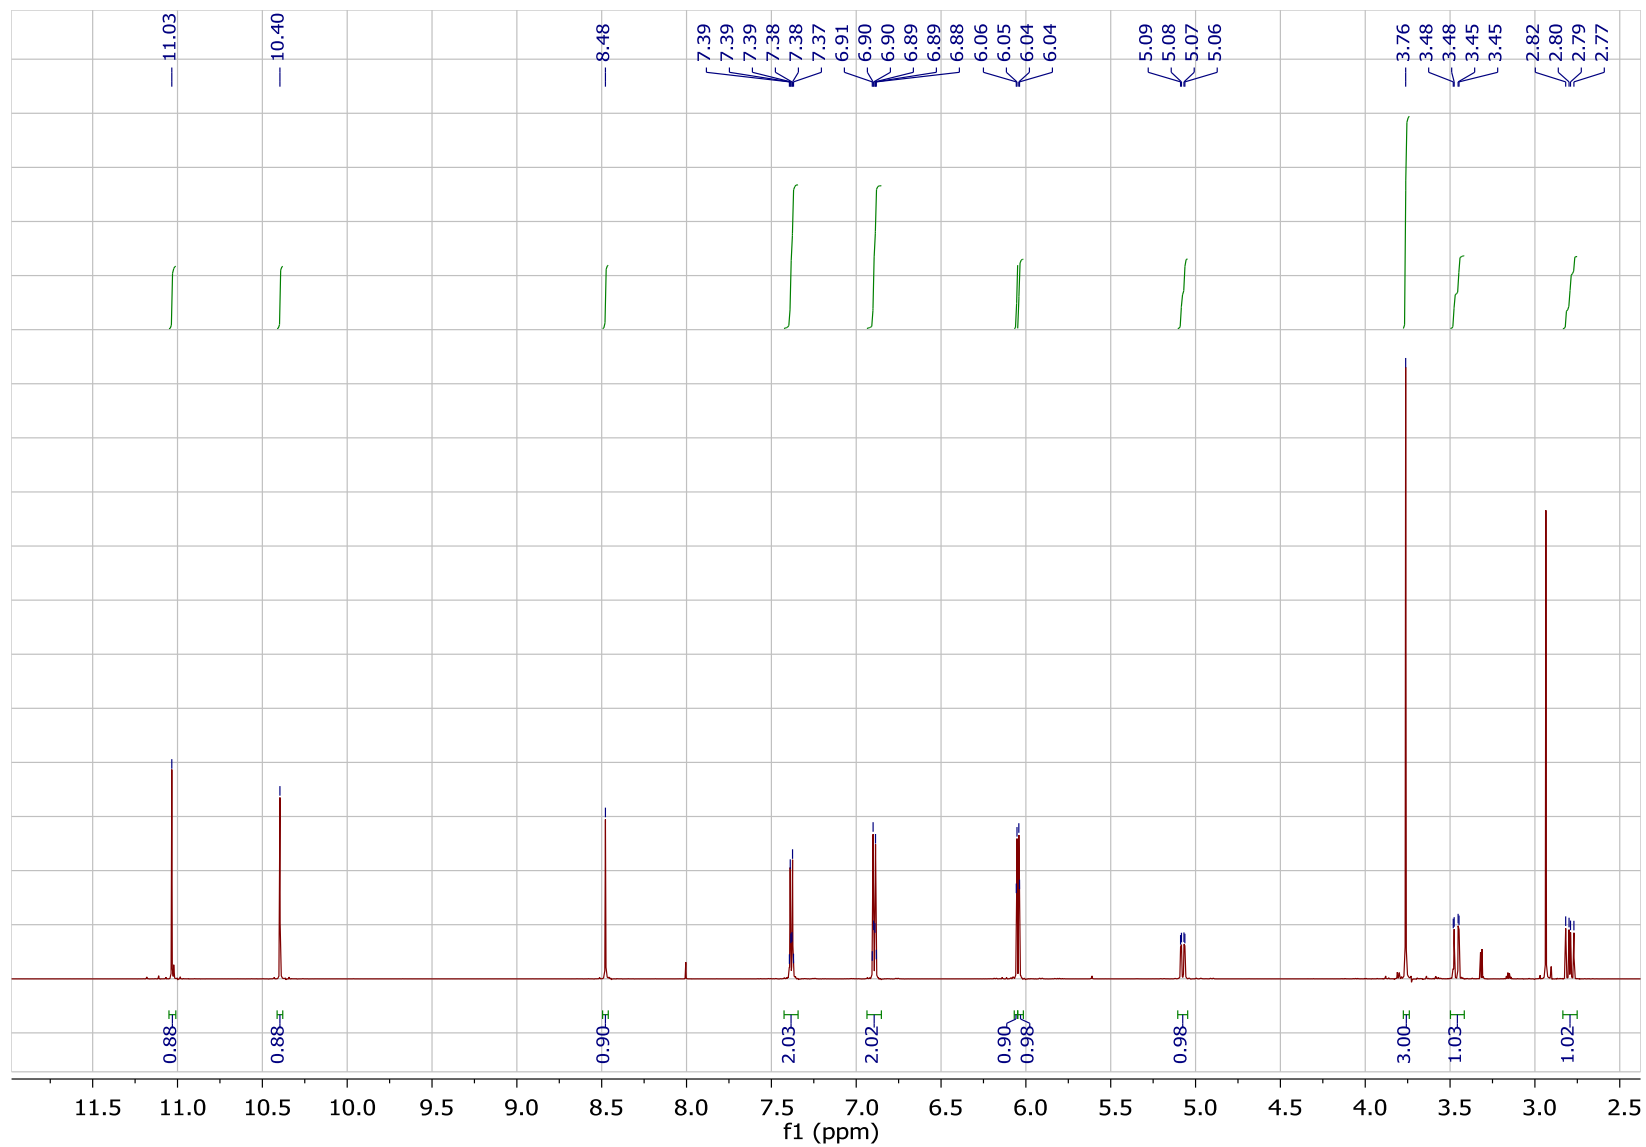

Figure S21. <sup>1</sup>H-NMR (600 MHz, Acetone-d<sub>6</sub>) spectrum of compound **1b**

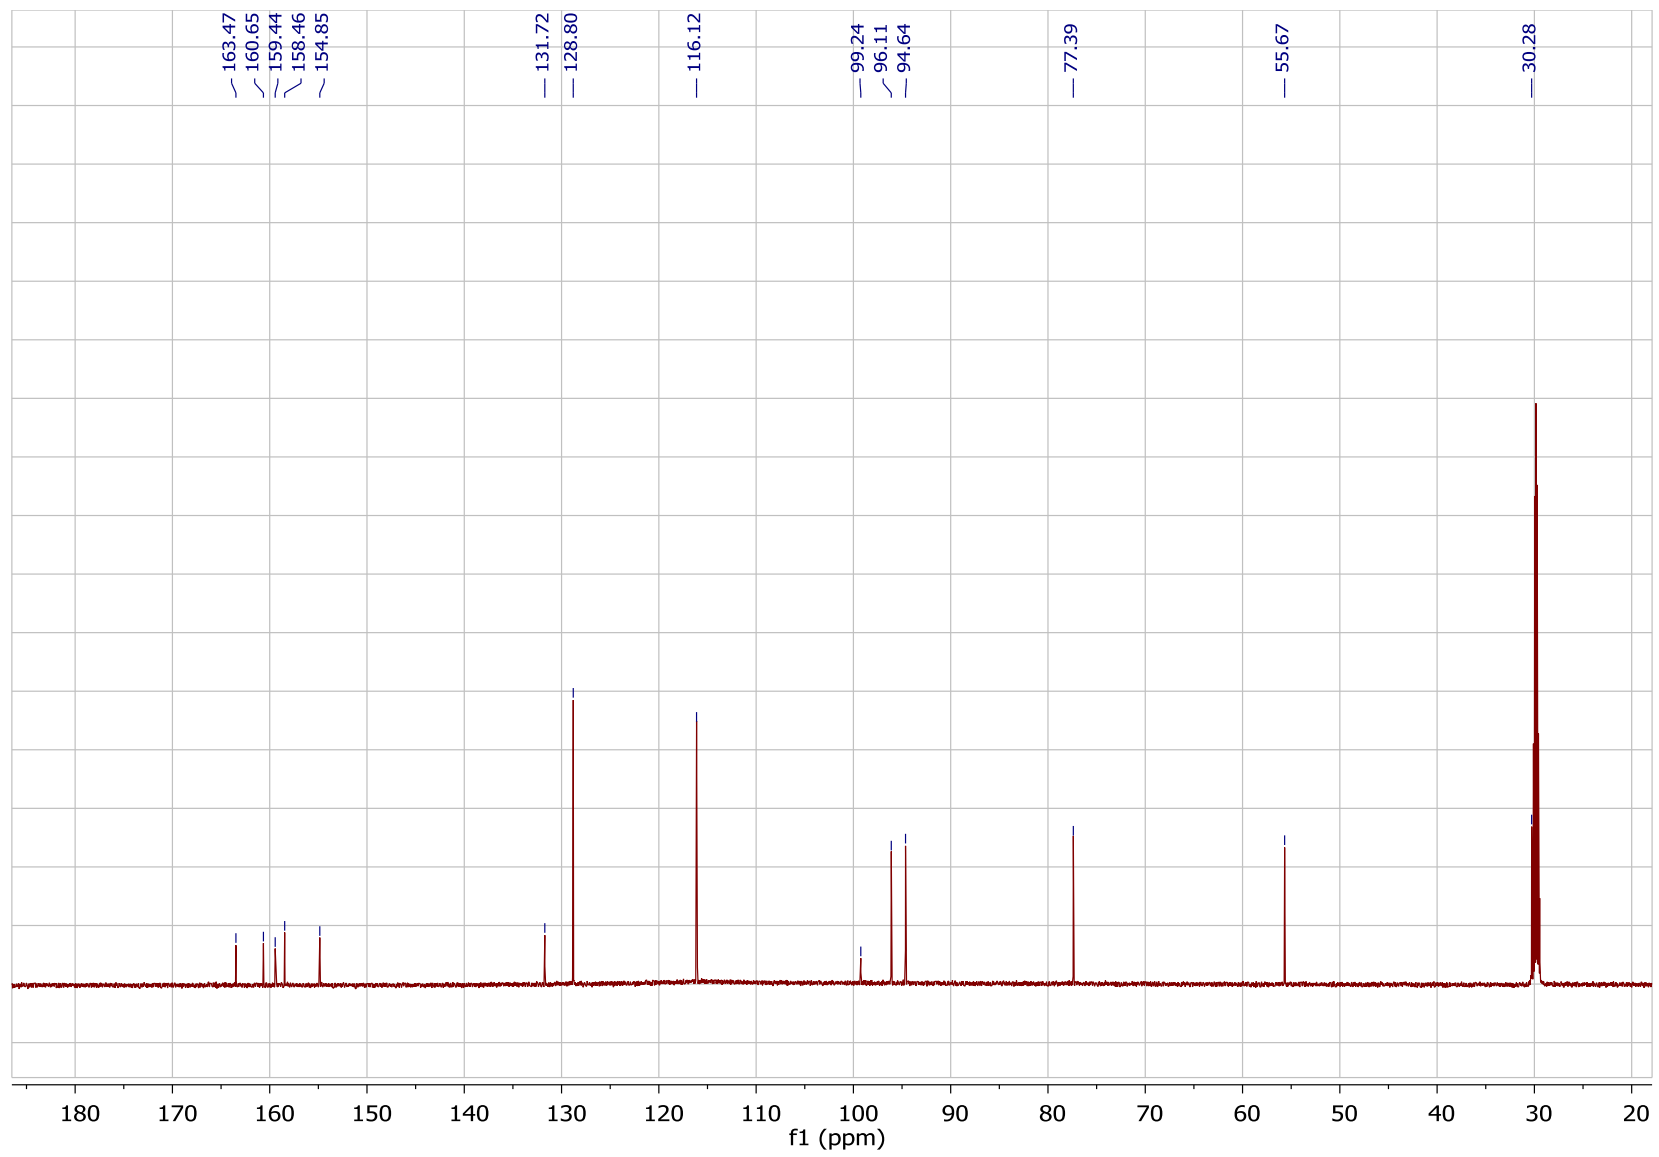

**Figure S22.**  $^{13}\text{C}$ -NMR (150 MHz,  $\text{Acetone-d}_6$ ) spectrum of compound **1b**

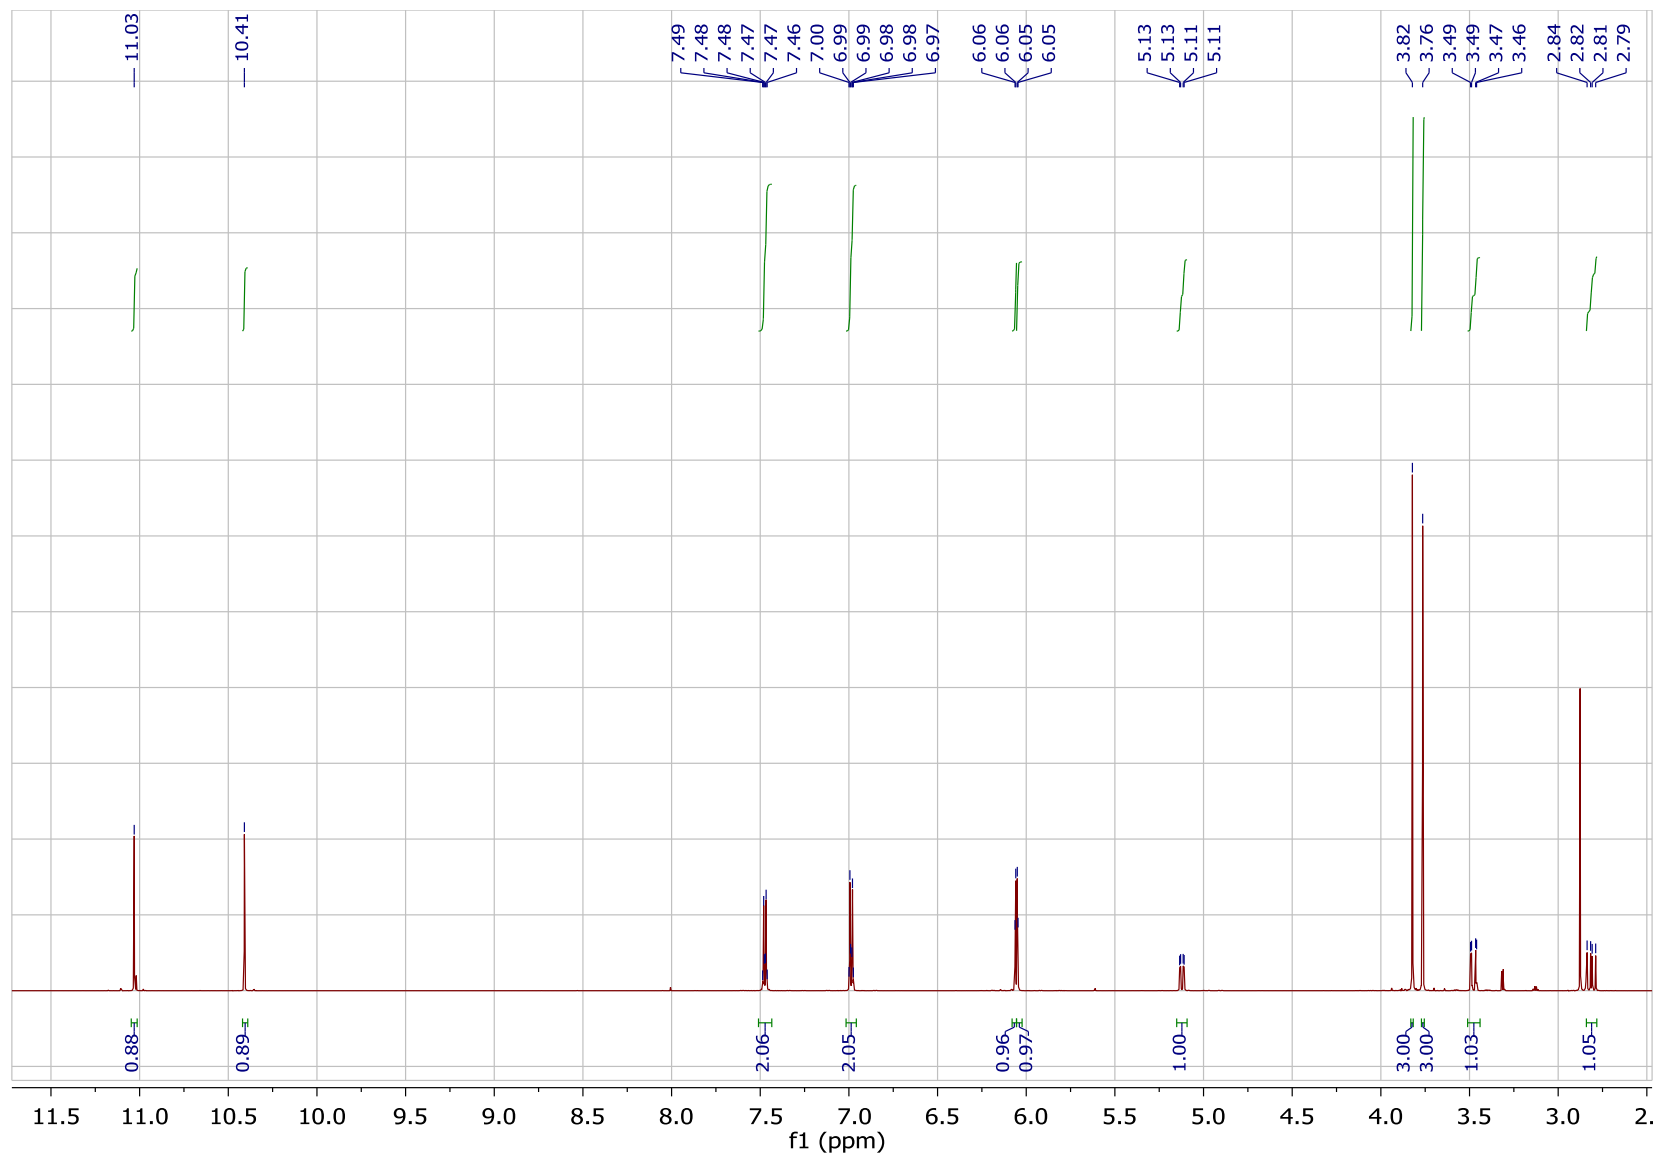

Figure S23.  $^1\text{H-NMR}$  (600 MHz,  $\text{Acetone-d}_6$ ) spectrum of compound **2b**

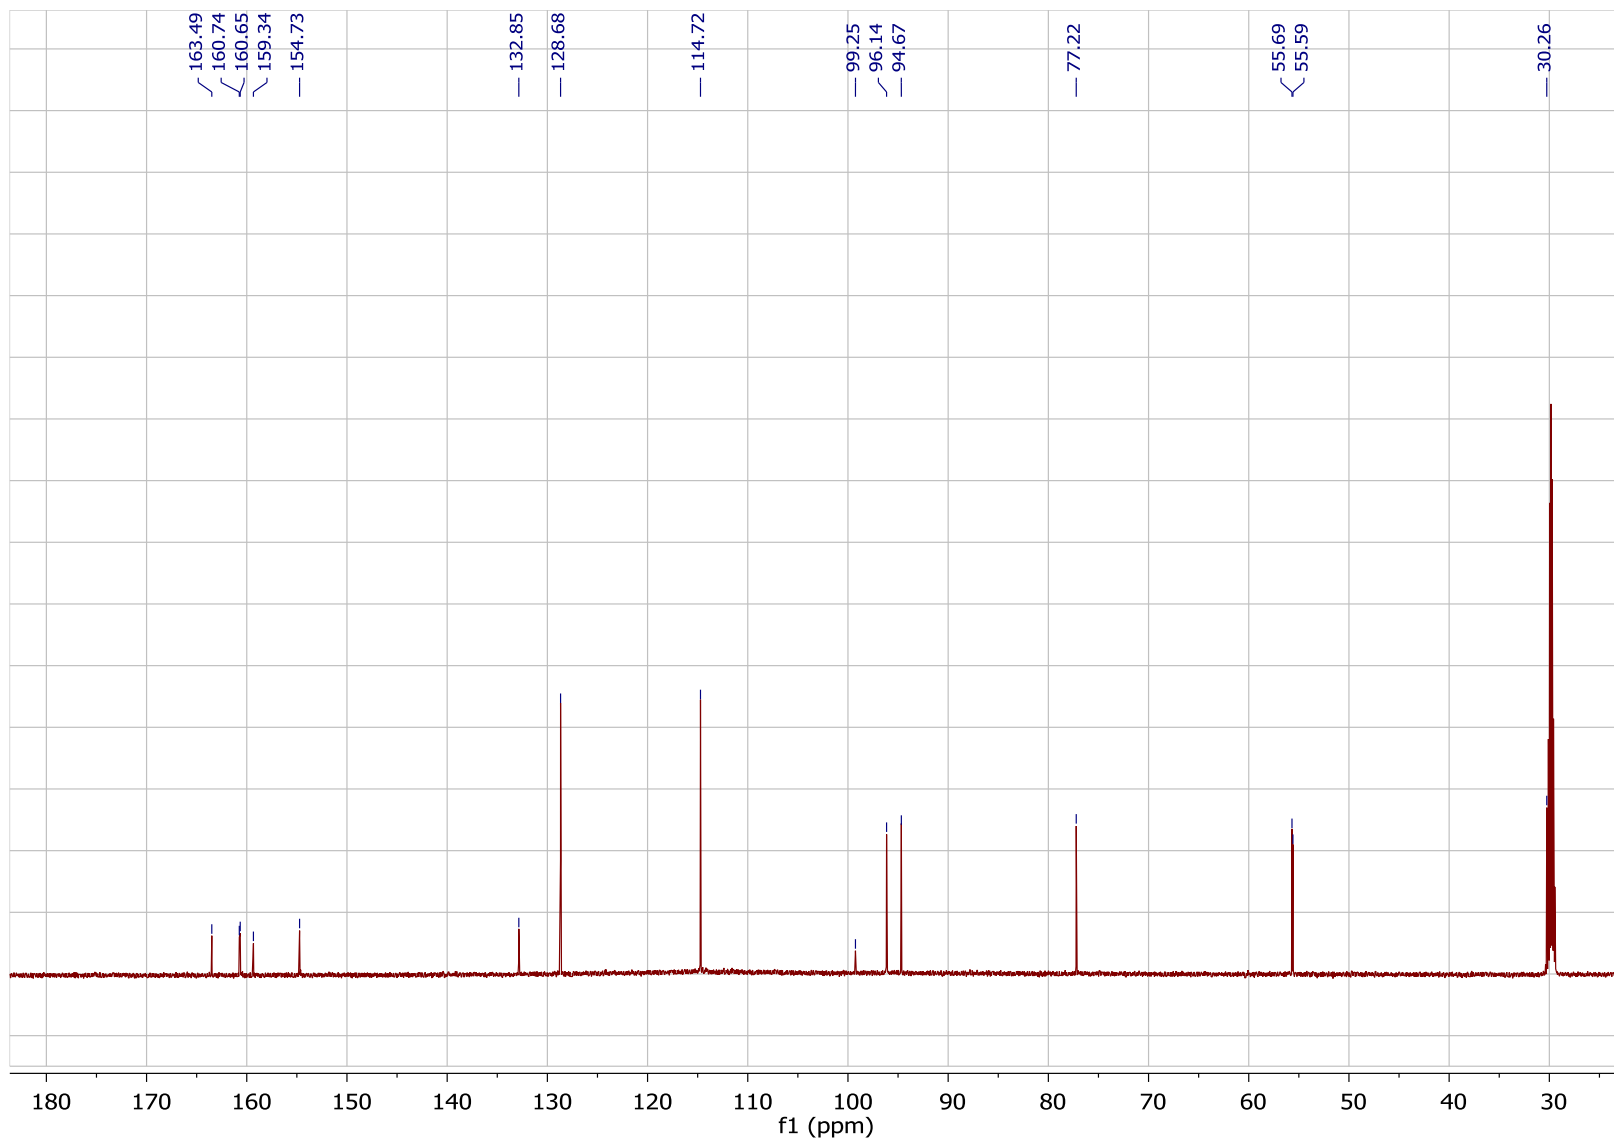

**Figure S24.**  $^{13}\text{C}$ -NMR (150 MHz, Acetone- $\text{d}_6$ ) spectrum of compound **2b**



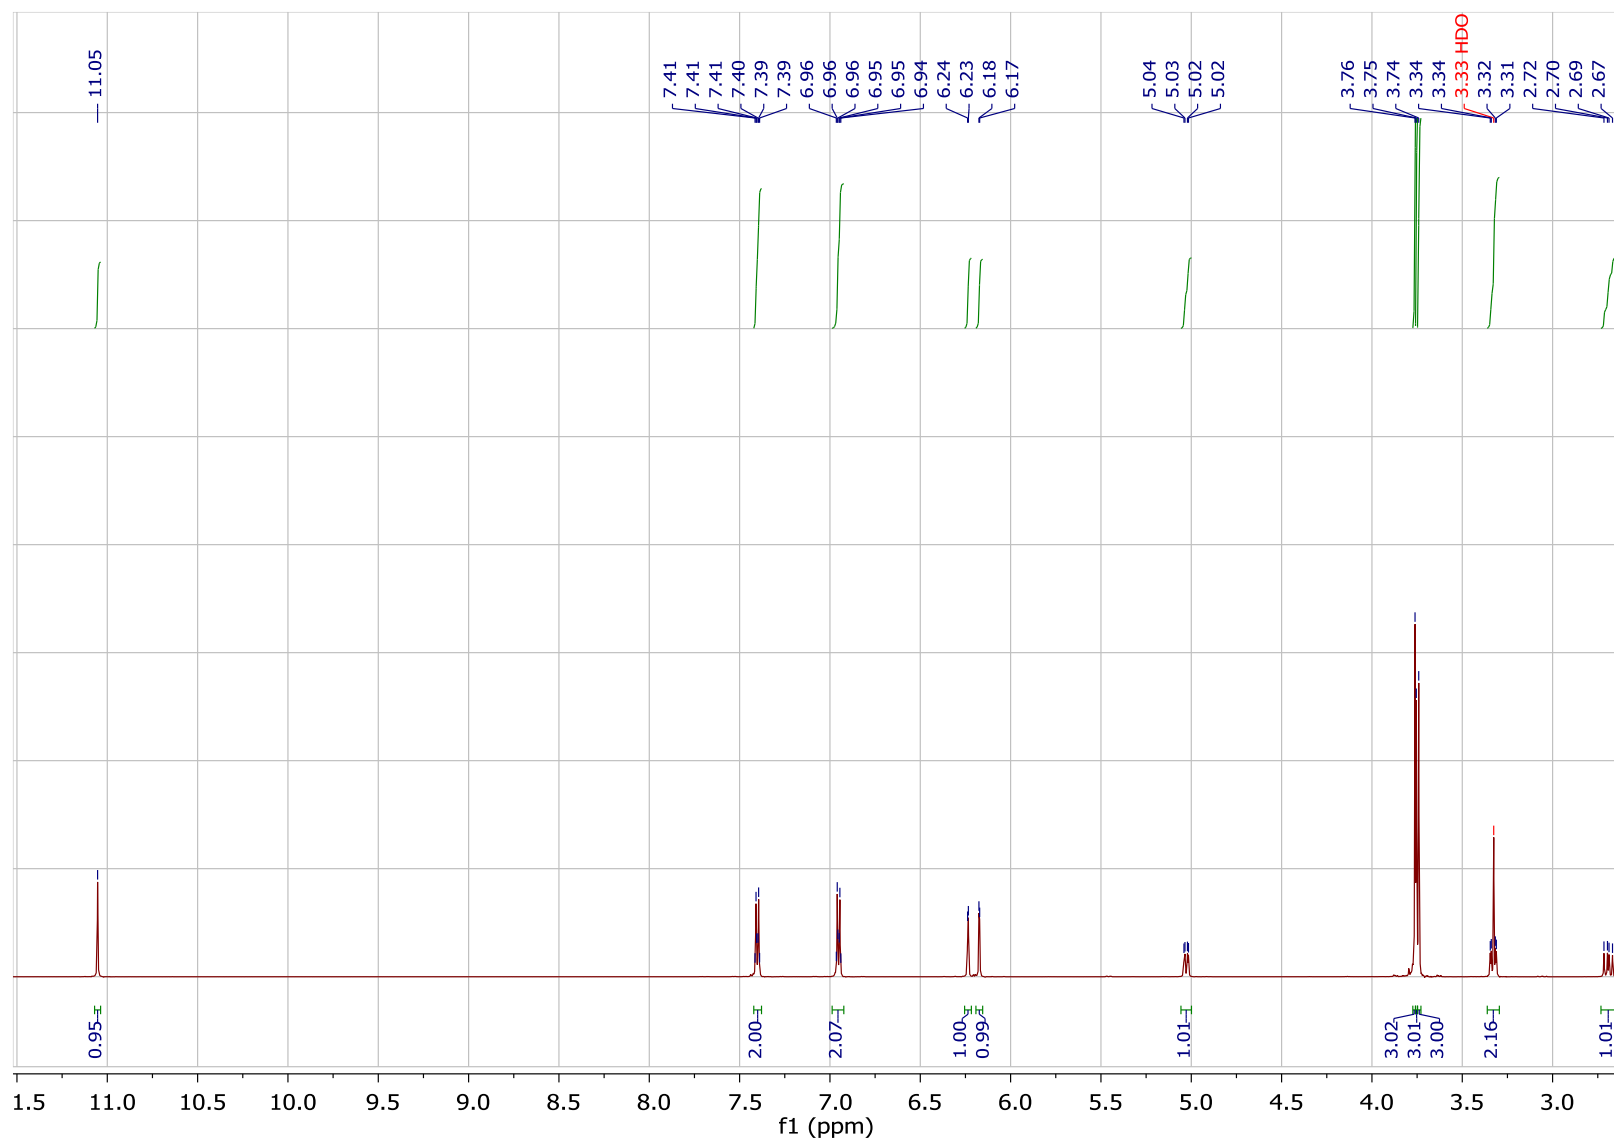

Figure S25. <sup>1</sup>H-NMR (600 MHz, DMSO-d<sub>6</sub>) spectrum of compound **3b**

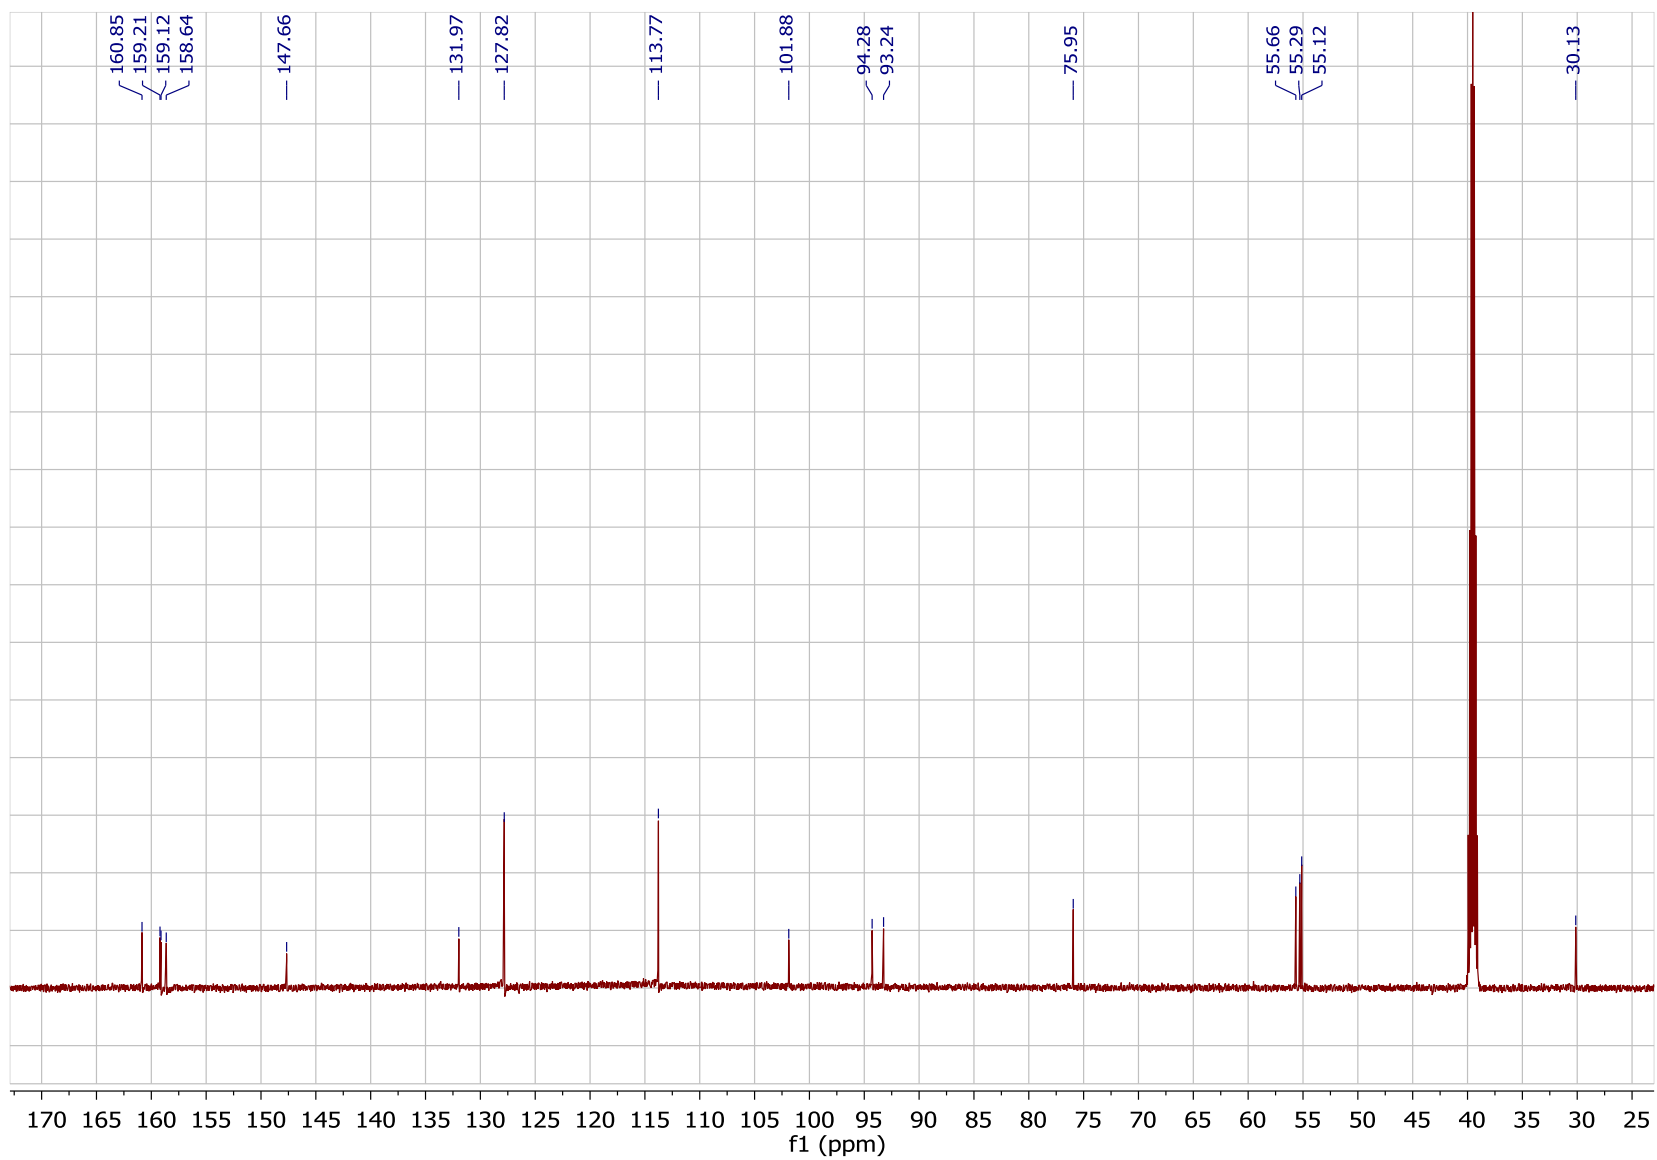

Figure S26.  $^{13}\text{C}$ -NMR (150 MHz,  $\text{DMSO-d}_6$ ) spectrum of compound **3b**

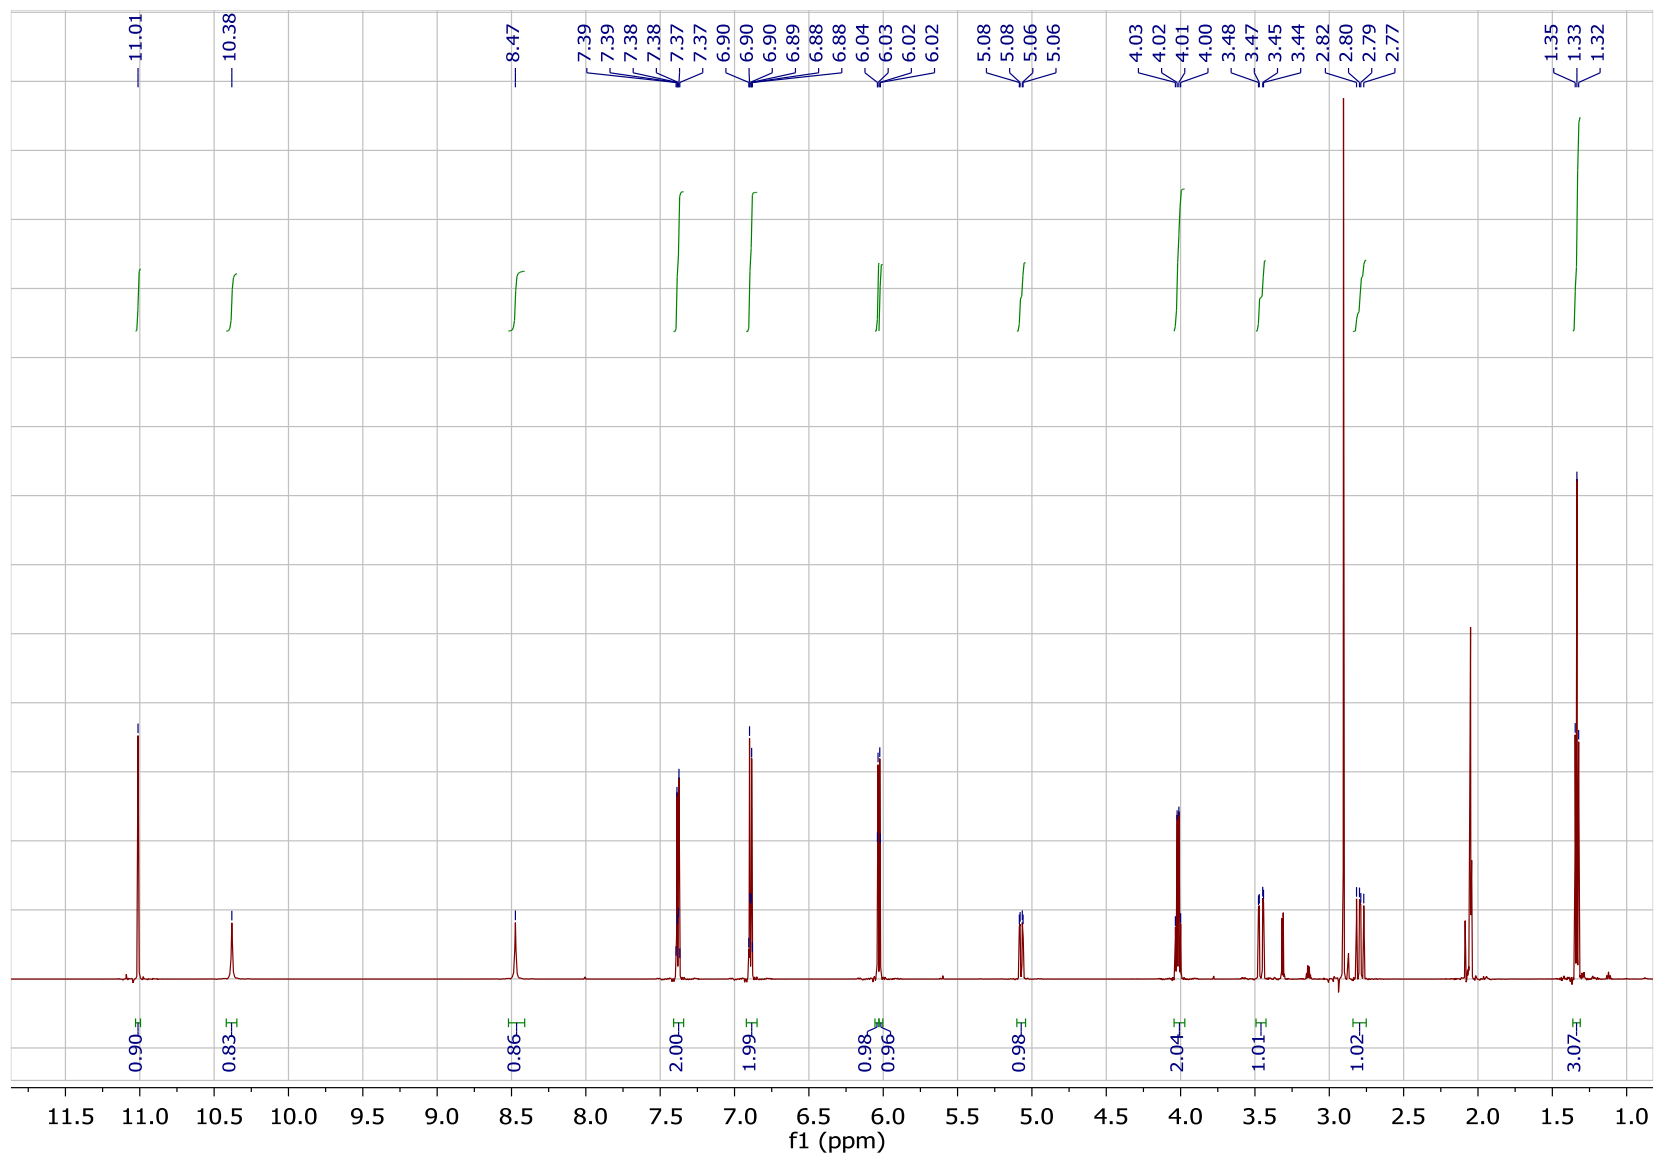

Figure S27. <sup>1</sup>H-NMR (600 MHz, Acetone-d<sub>6</sub>) spectrum of compound 4b

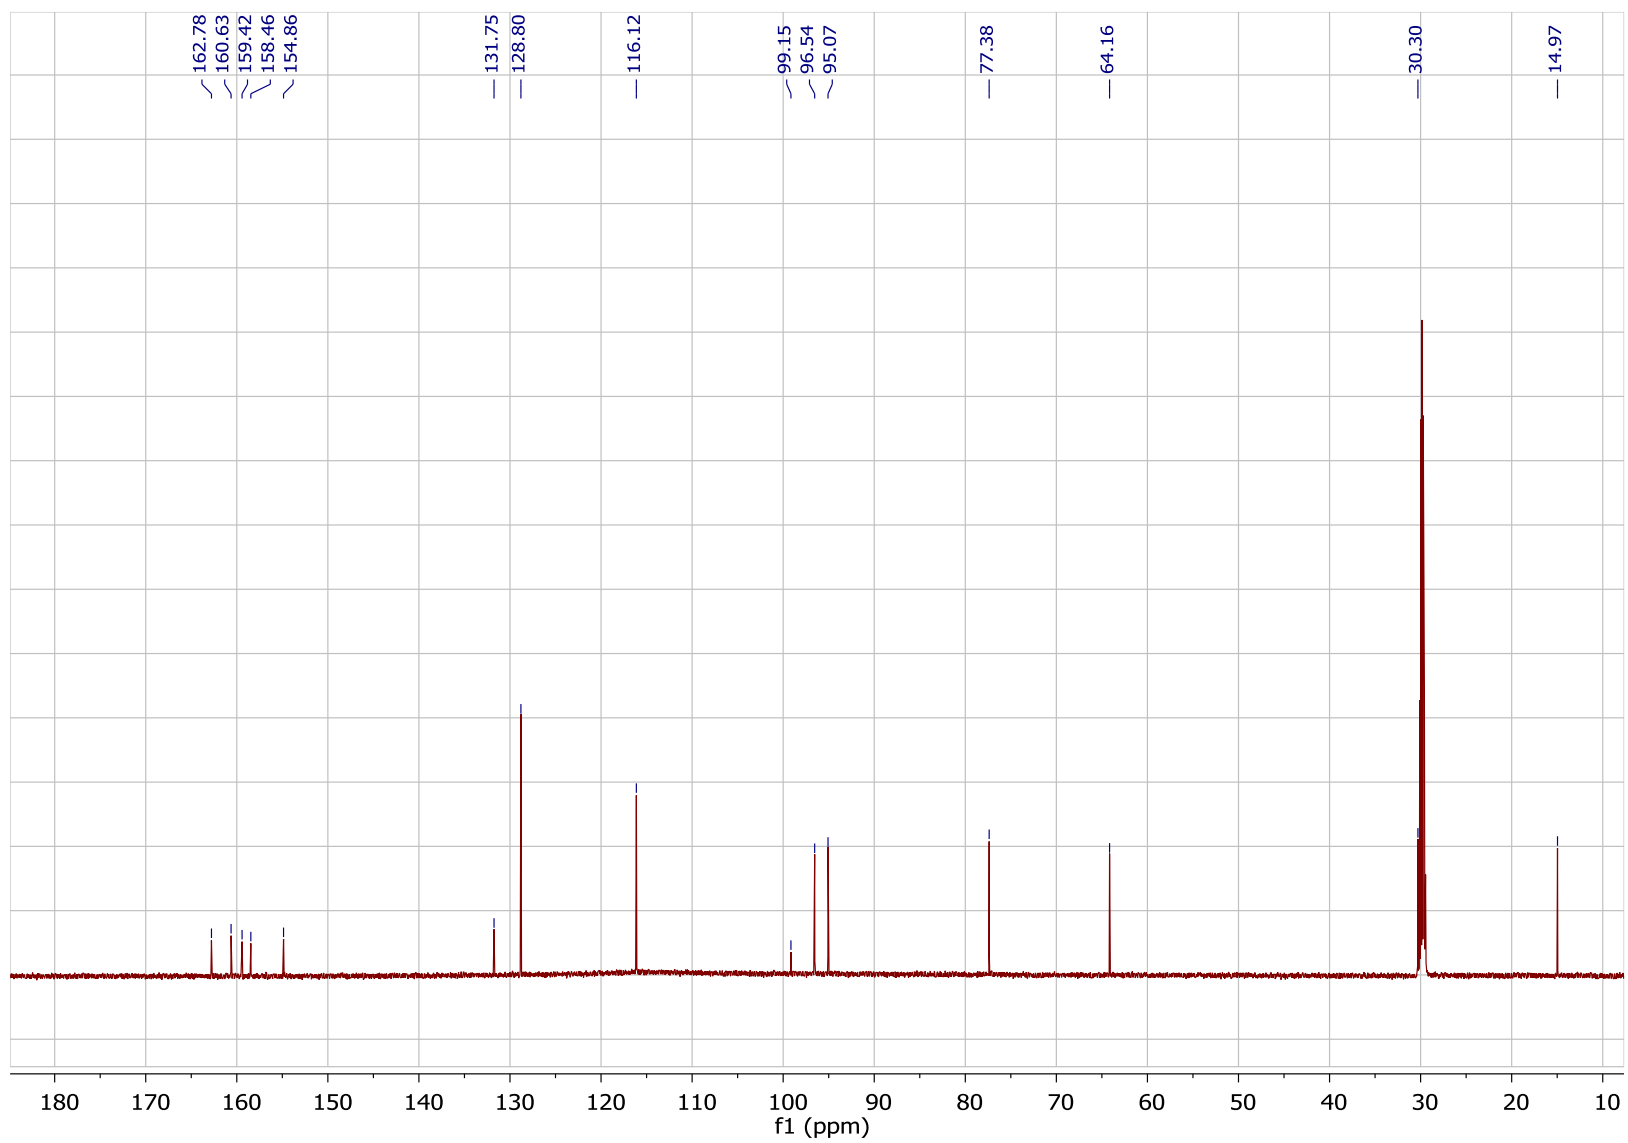

Figure S28. <sup>13</sup>C-NMR (150 MHz, Acetone-d<sub>6</sub>) spectrum of compound 4b

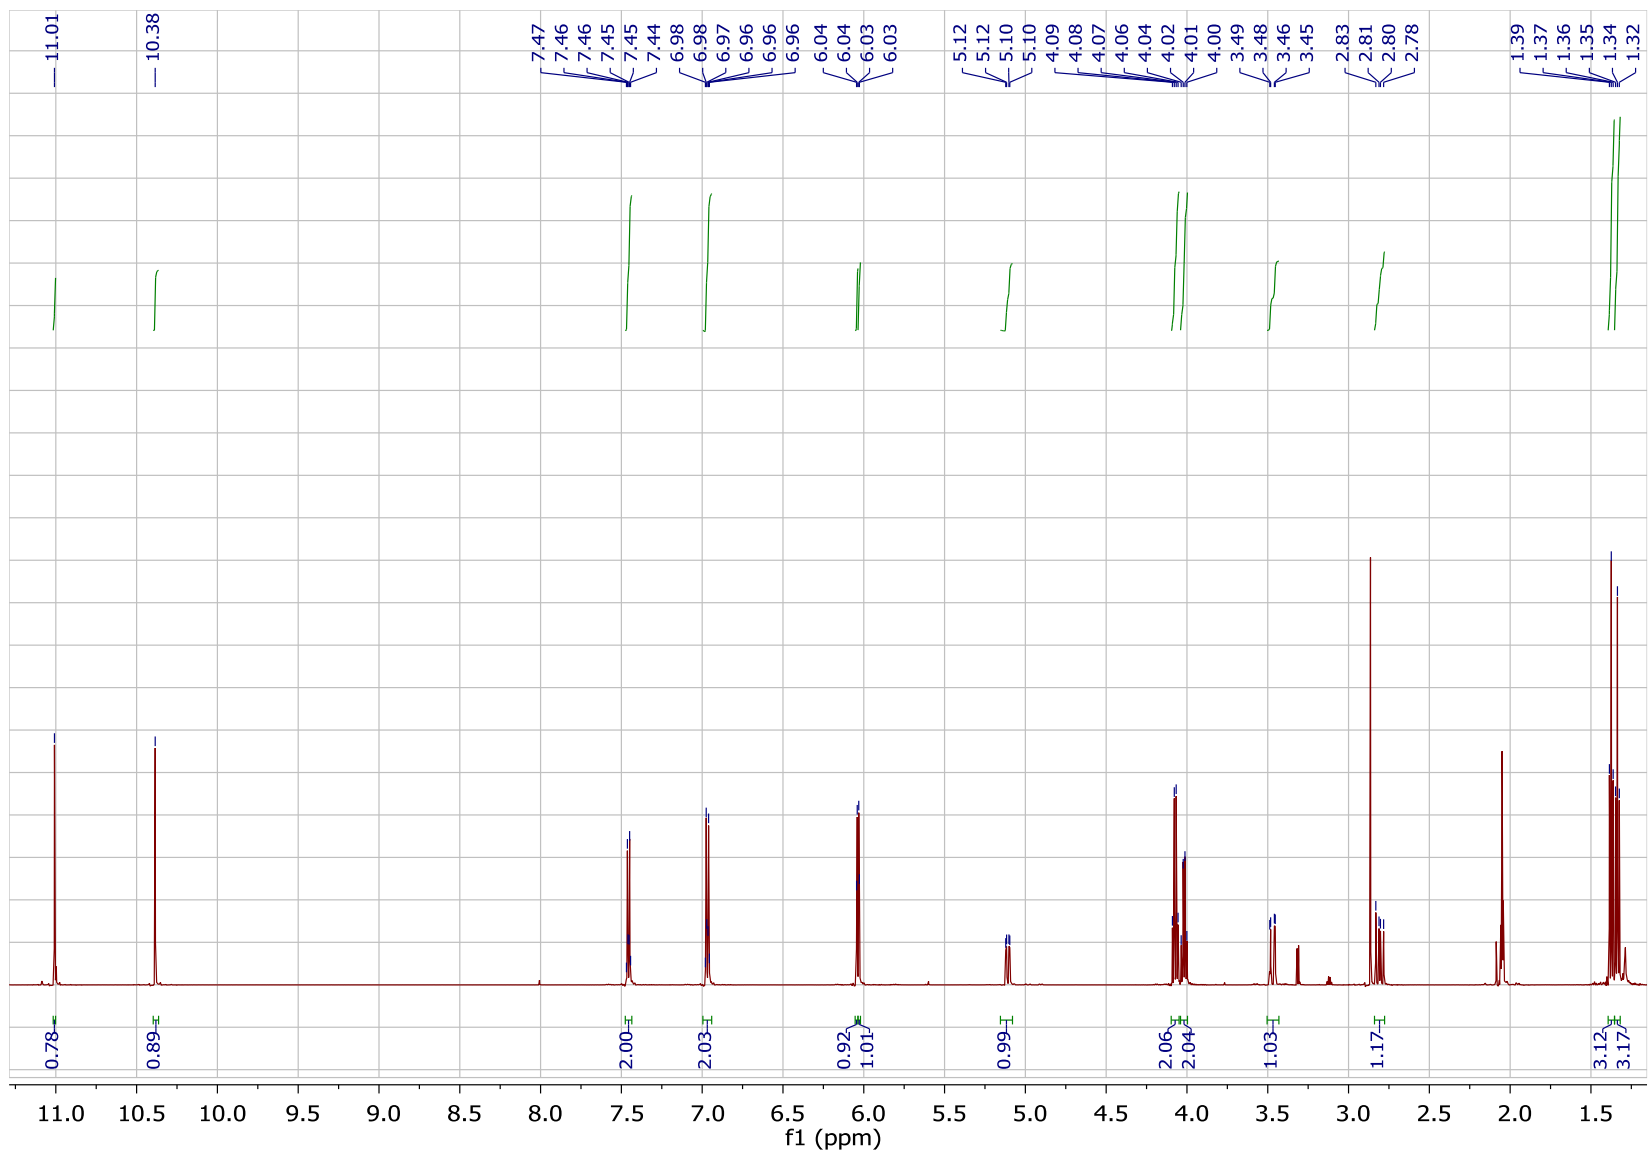

Figure S29. <sup>1</sup>H-NMR (600 MHz, Acetone-d<sub>6</sub>) spectrum of compound 5b

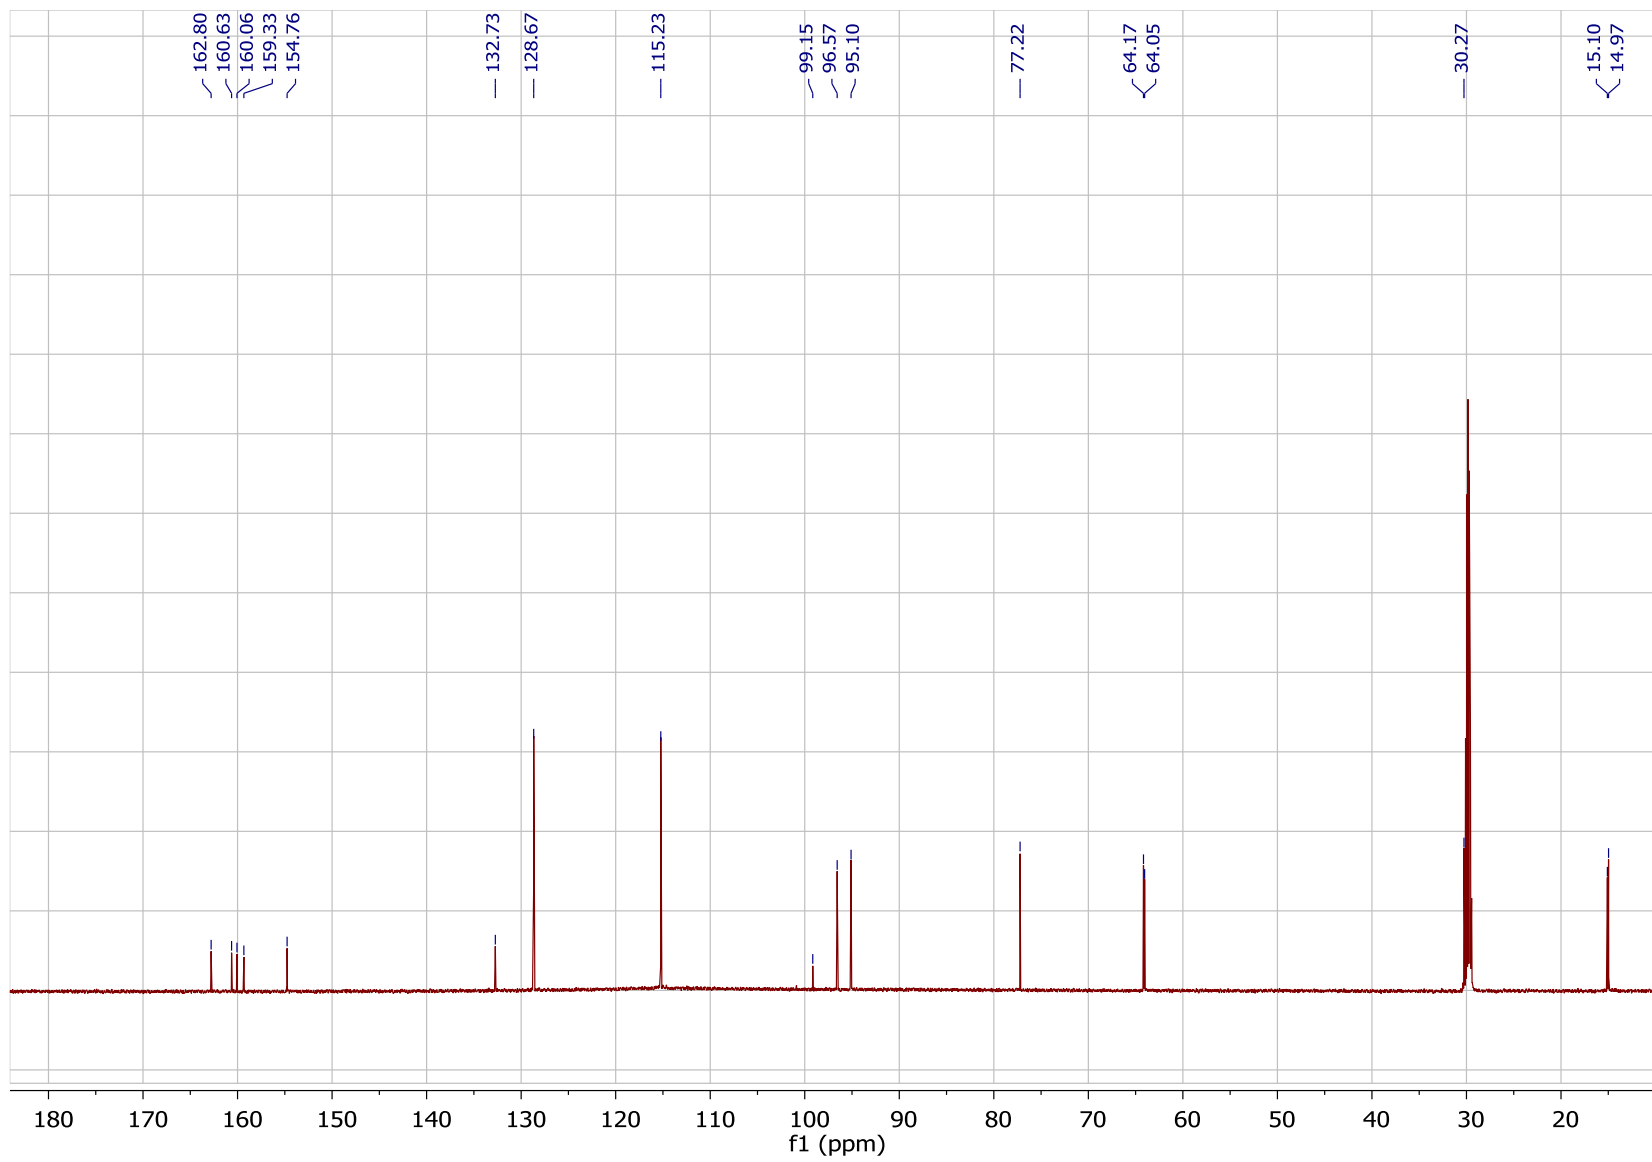

**Figure S30.**  $^{13}\text{C}$ -NMR (150 MHz,  $\text{Acetone-d}_6$ ) spectrum of compound **5b**

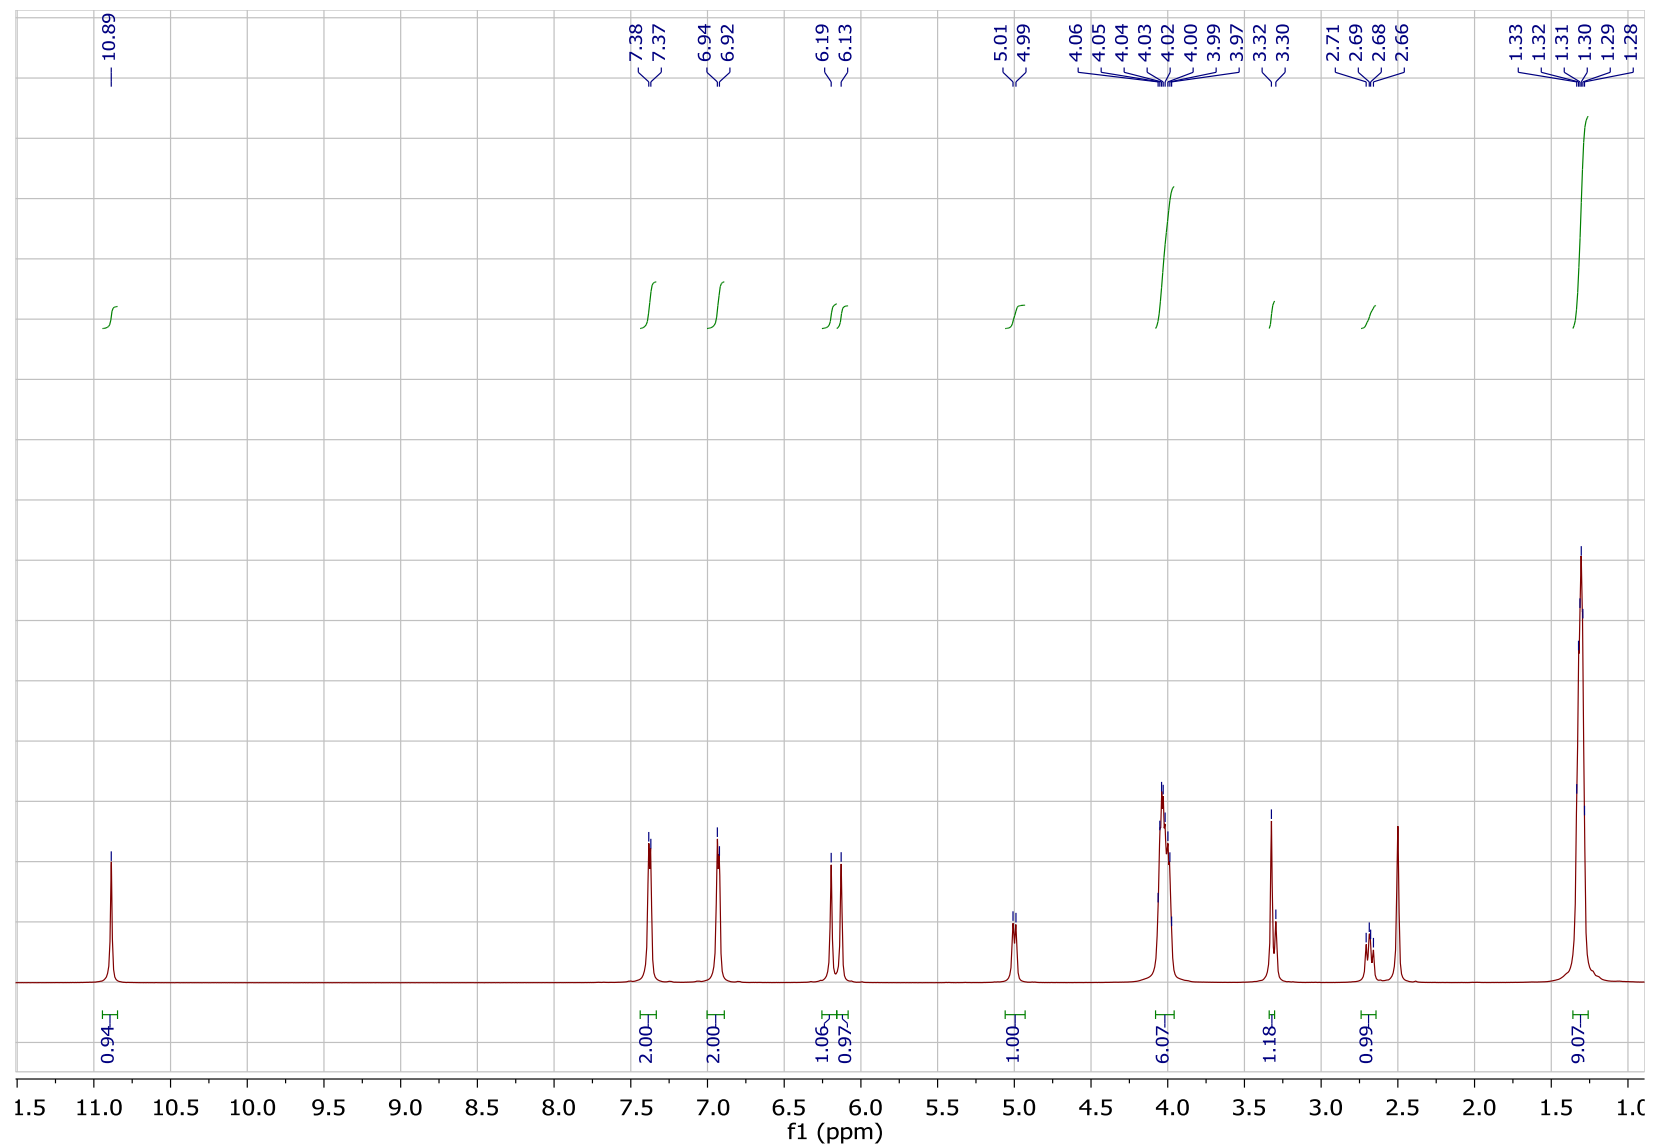

Figure S31. <sup>1</sup>H-NMR (600 MHz, DMSO-d<sub>6</sub>) spectrum of compound 6b

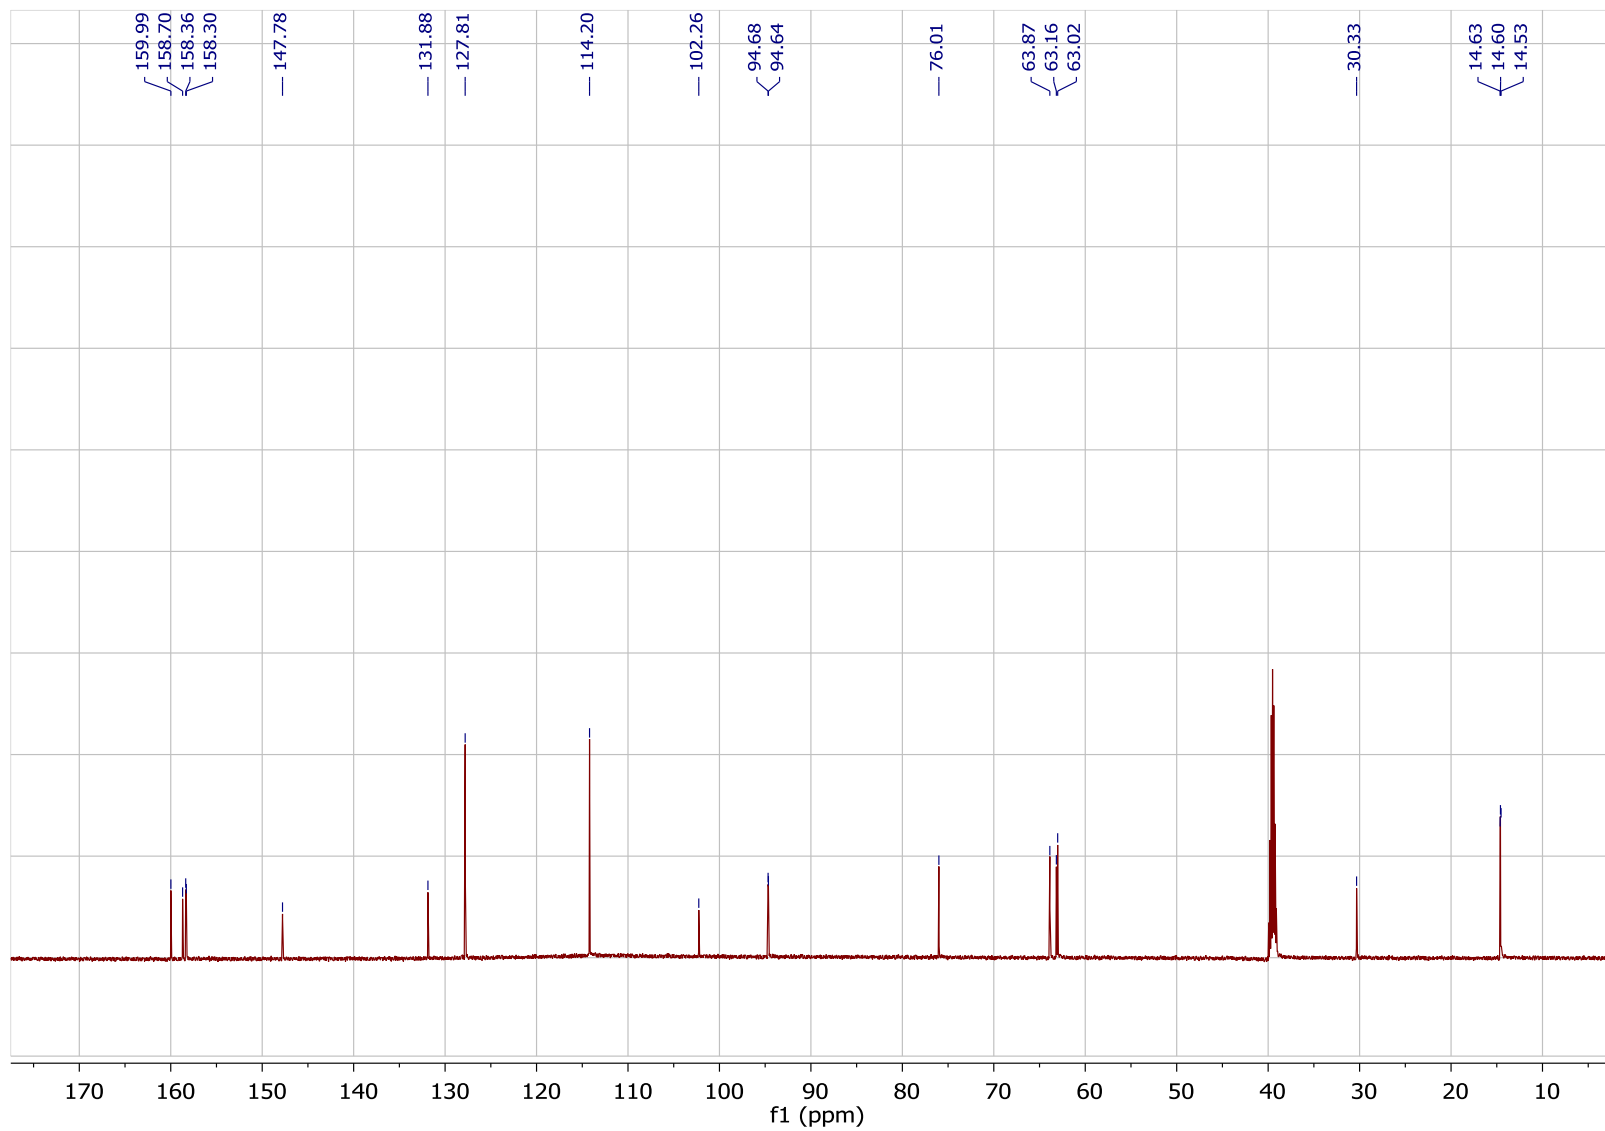

Figure S32.  $^{13}\text{C}$ -NMR (150 MHz,  $\text{DMSO-d}_6$ ) spectrum of compound **6b**



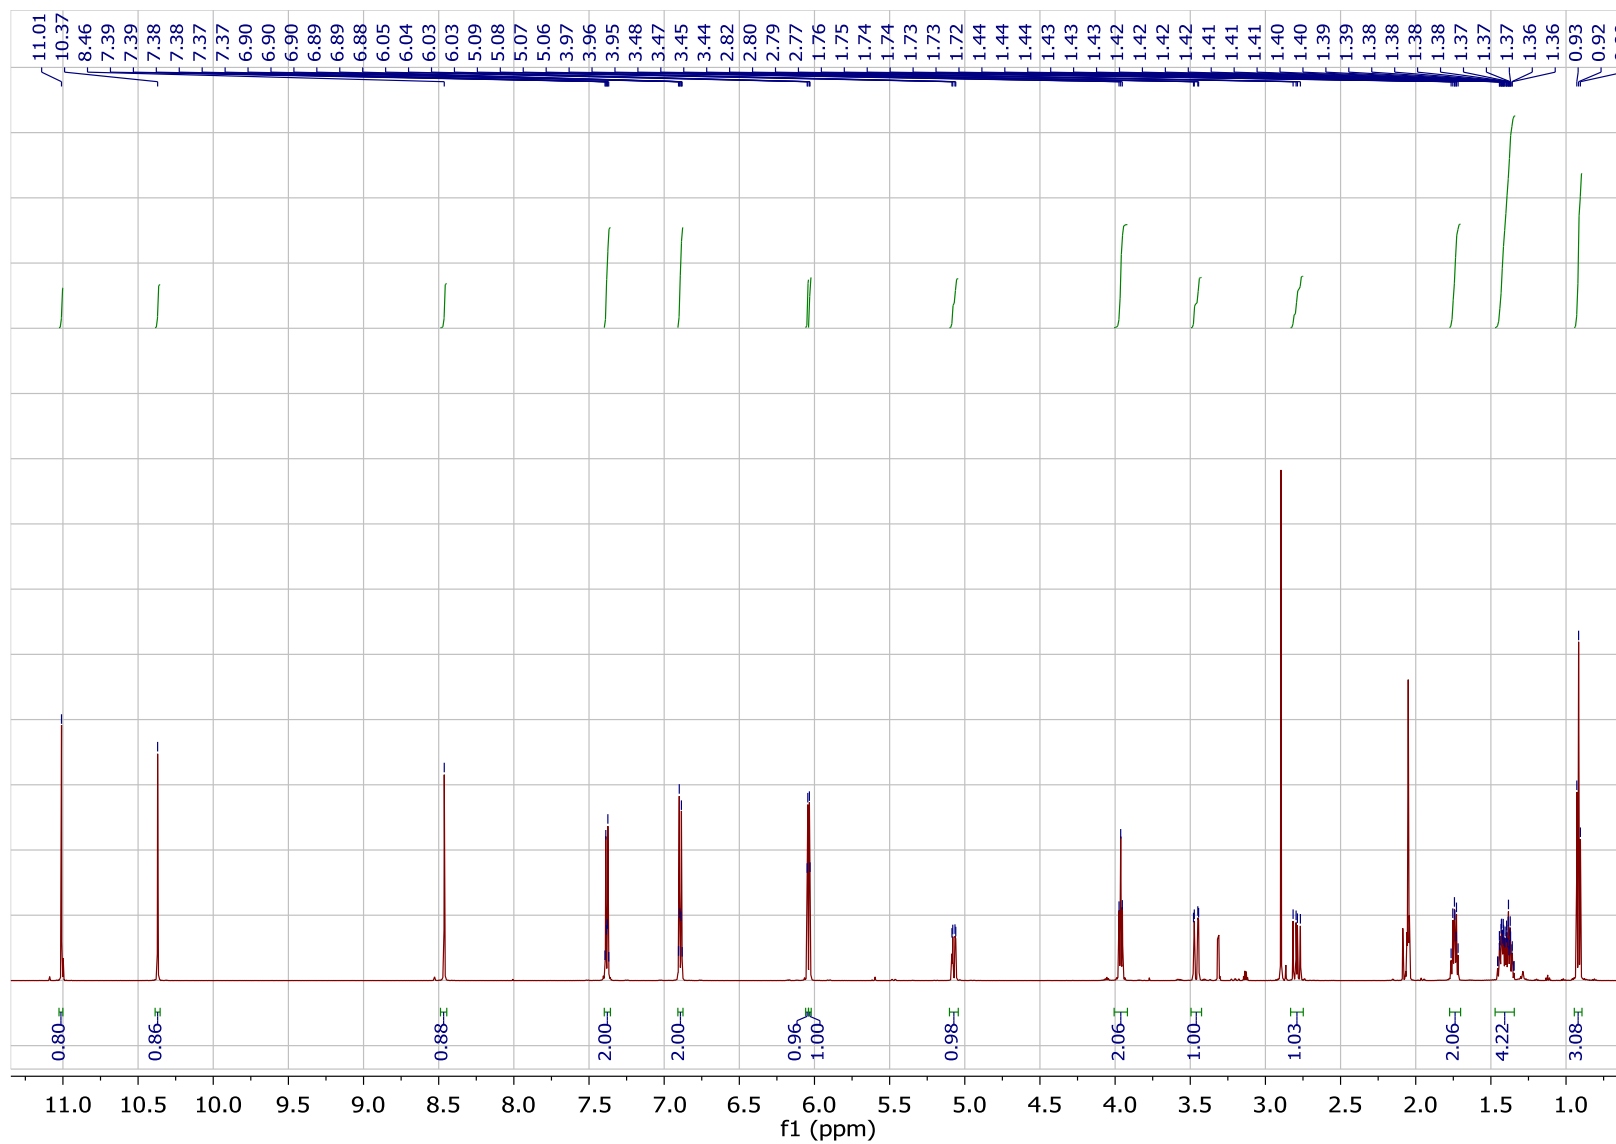

Figure S33. <sup>1</sup>H-NMR (600 MHz, Acetone-d<sub>6</sub>) spectrum of compound 7b

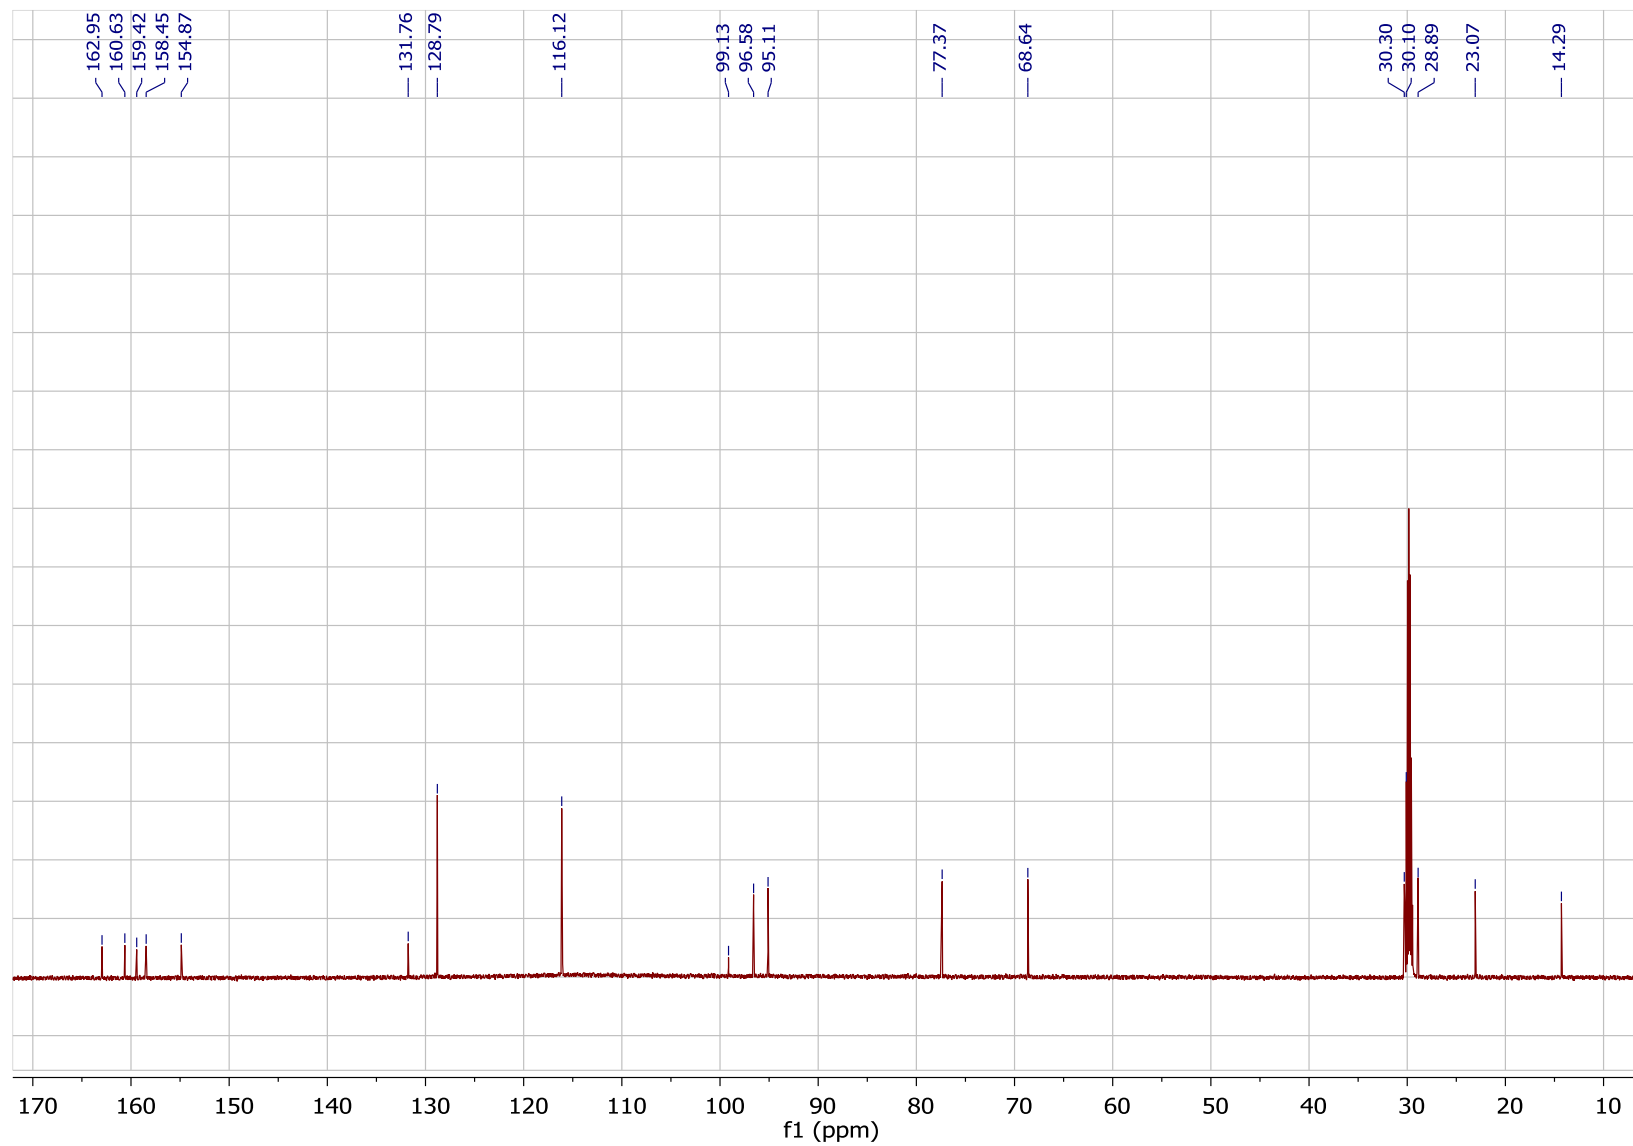

Figure S34. <sup>13</sup>C-NMR (150 MHz, Acetone-d<sub>6</sub>) spectrum of compound 7b

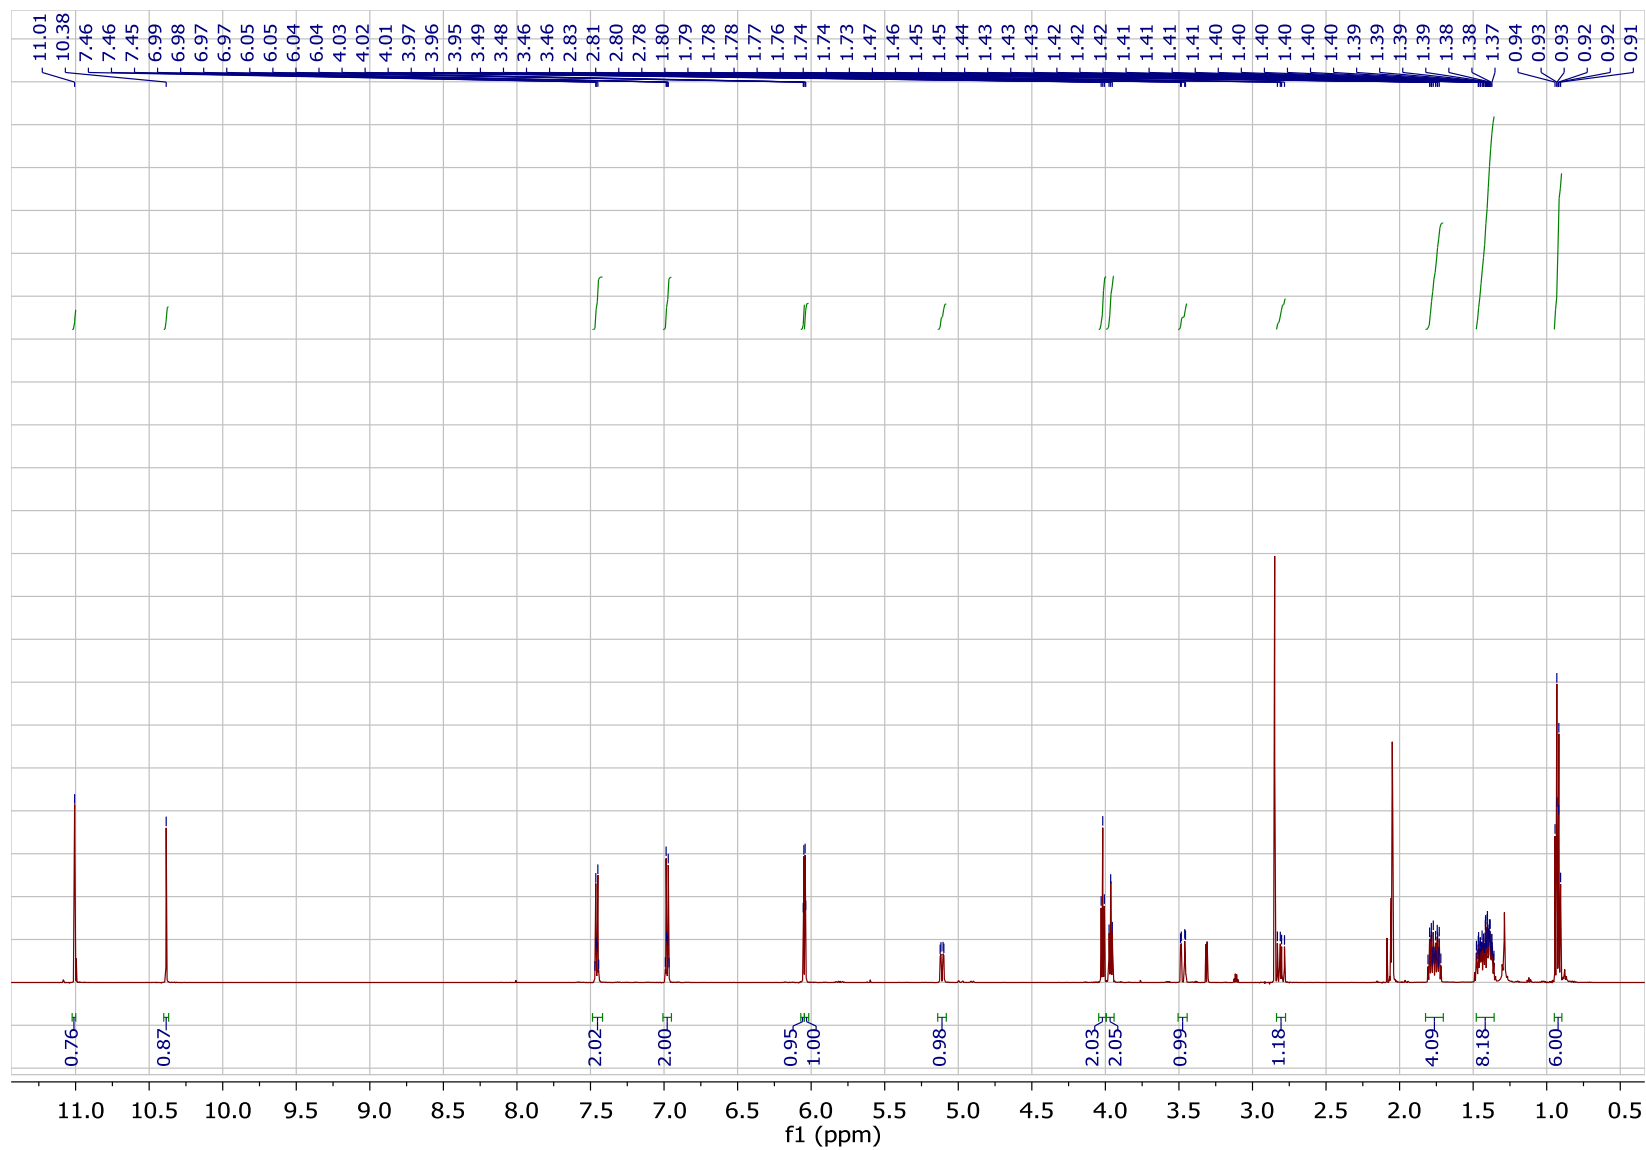

Figure S35. <sup>1</sup>H-NMR (600 MHz, Acetone-d<sub>6</sub>) spectrum of compound **8b**

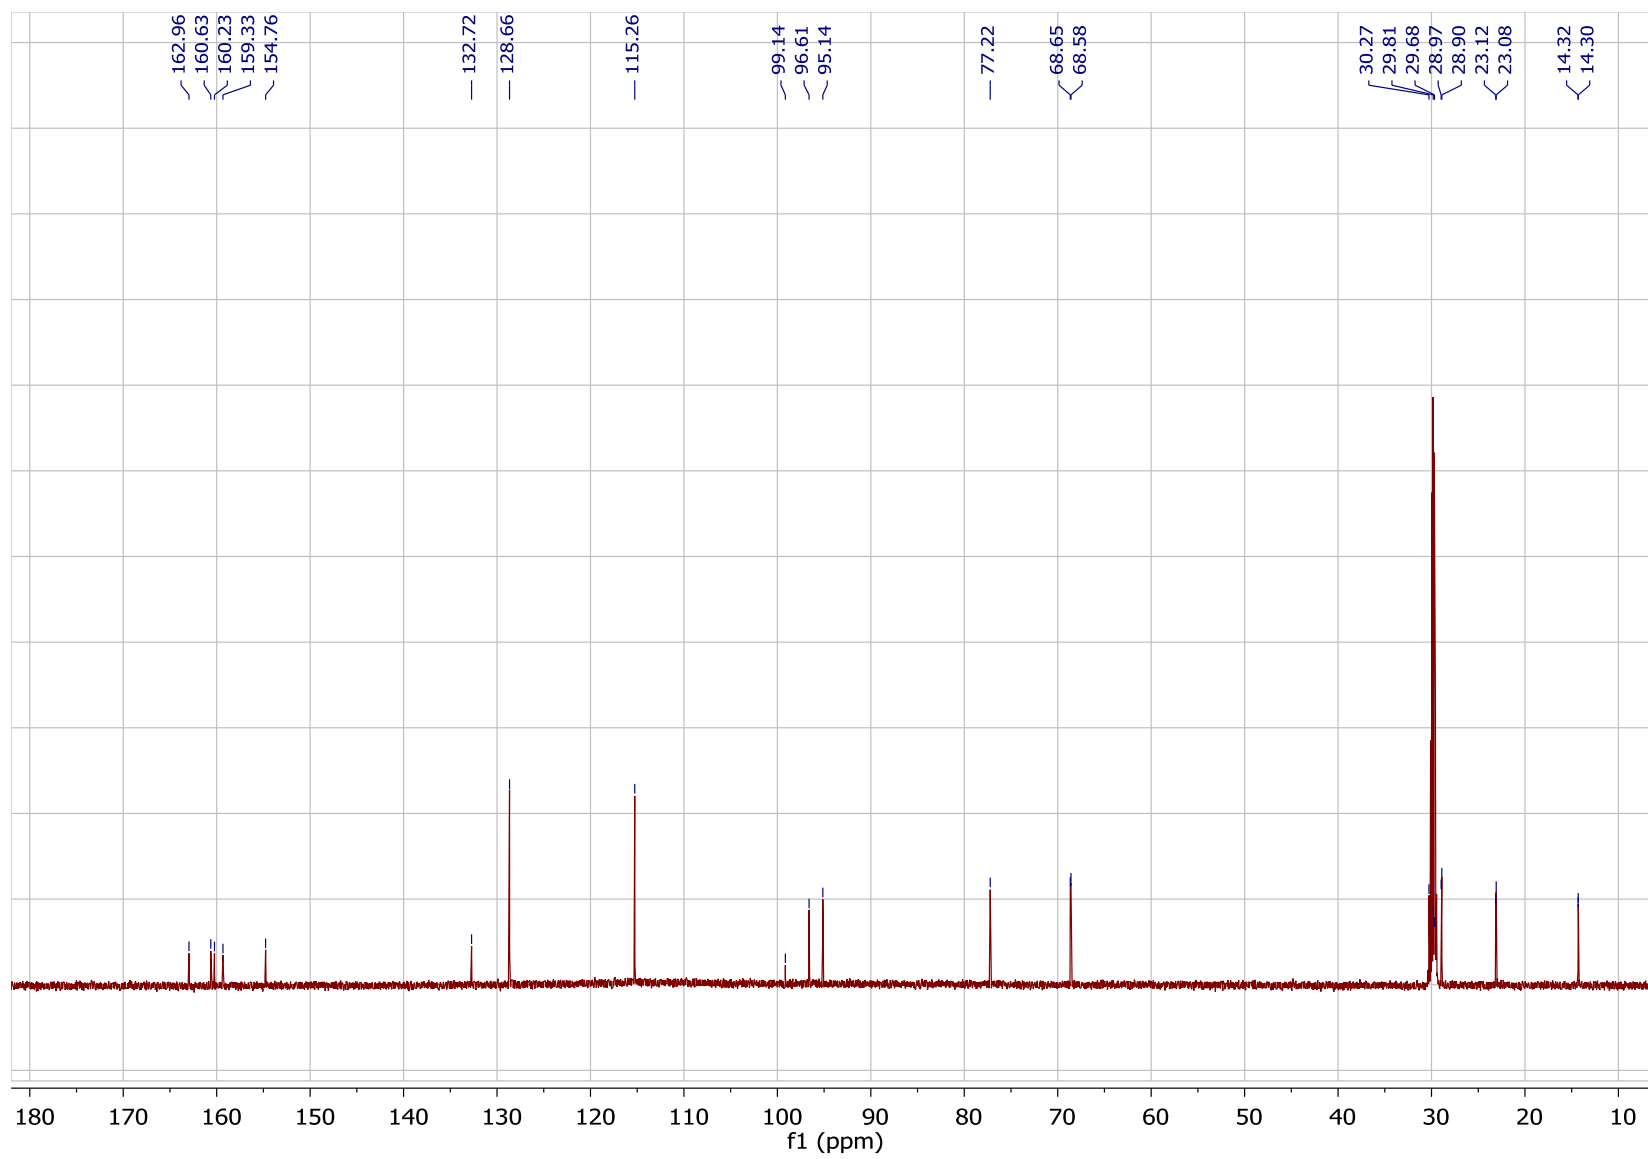

**Figure S36.**  $^{13}\text{C}$ -NMR (150 MHz, Acetone- $d_6$ ) spectrum of compound **8b**

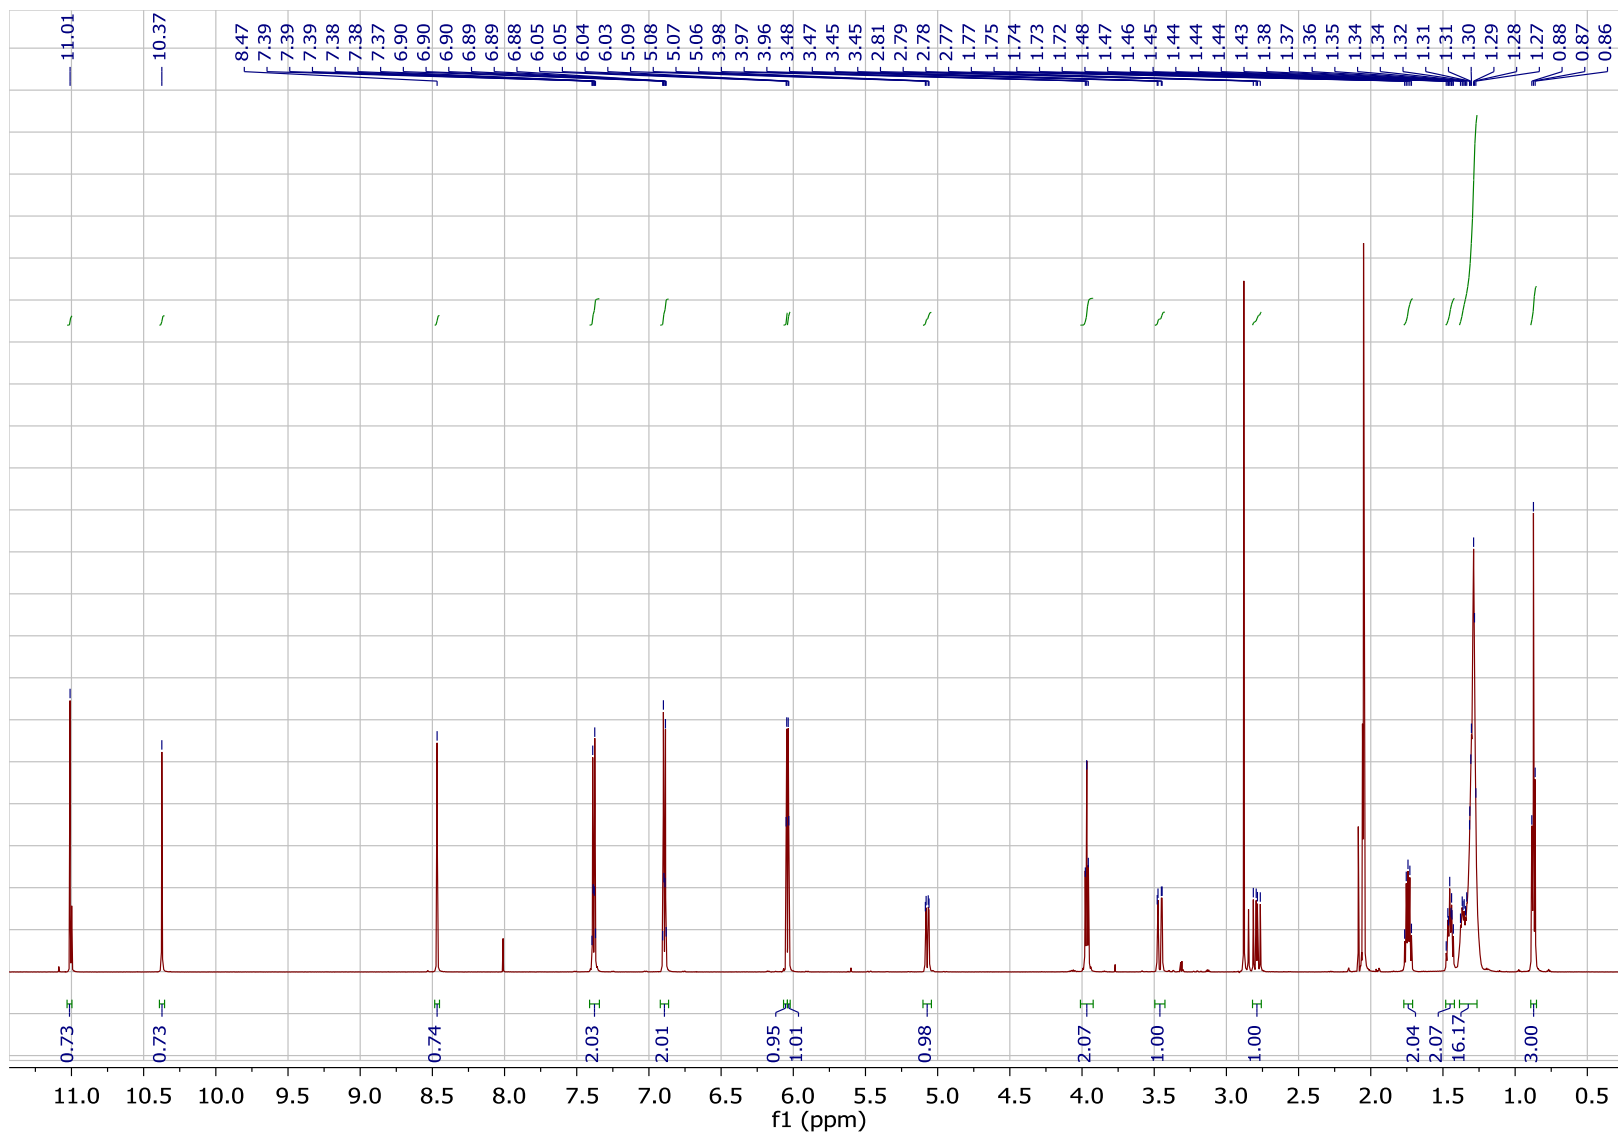

Figure S37. <sup>1</sup>H-NMR (600 MHz, Acetone-d<sub>6</sub>) spectrum of compound **9b**

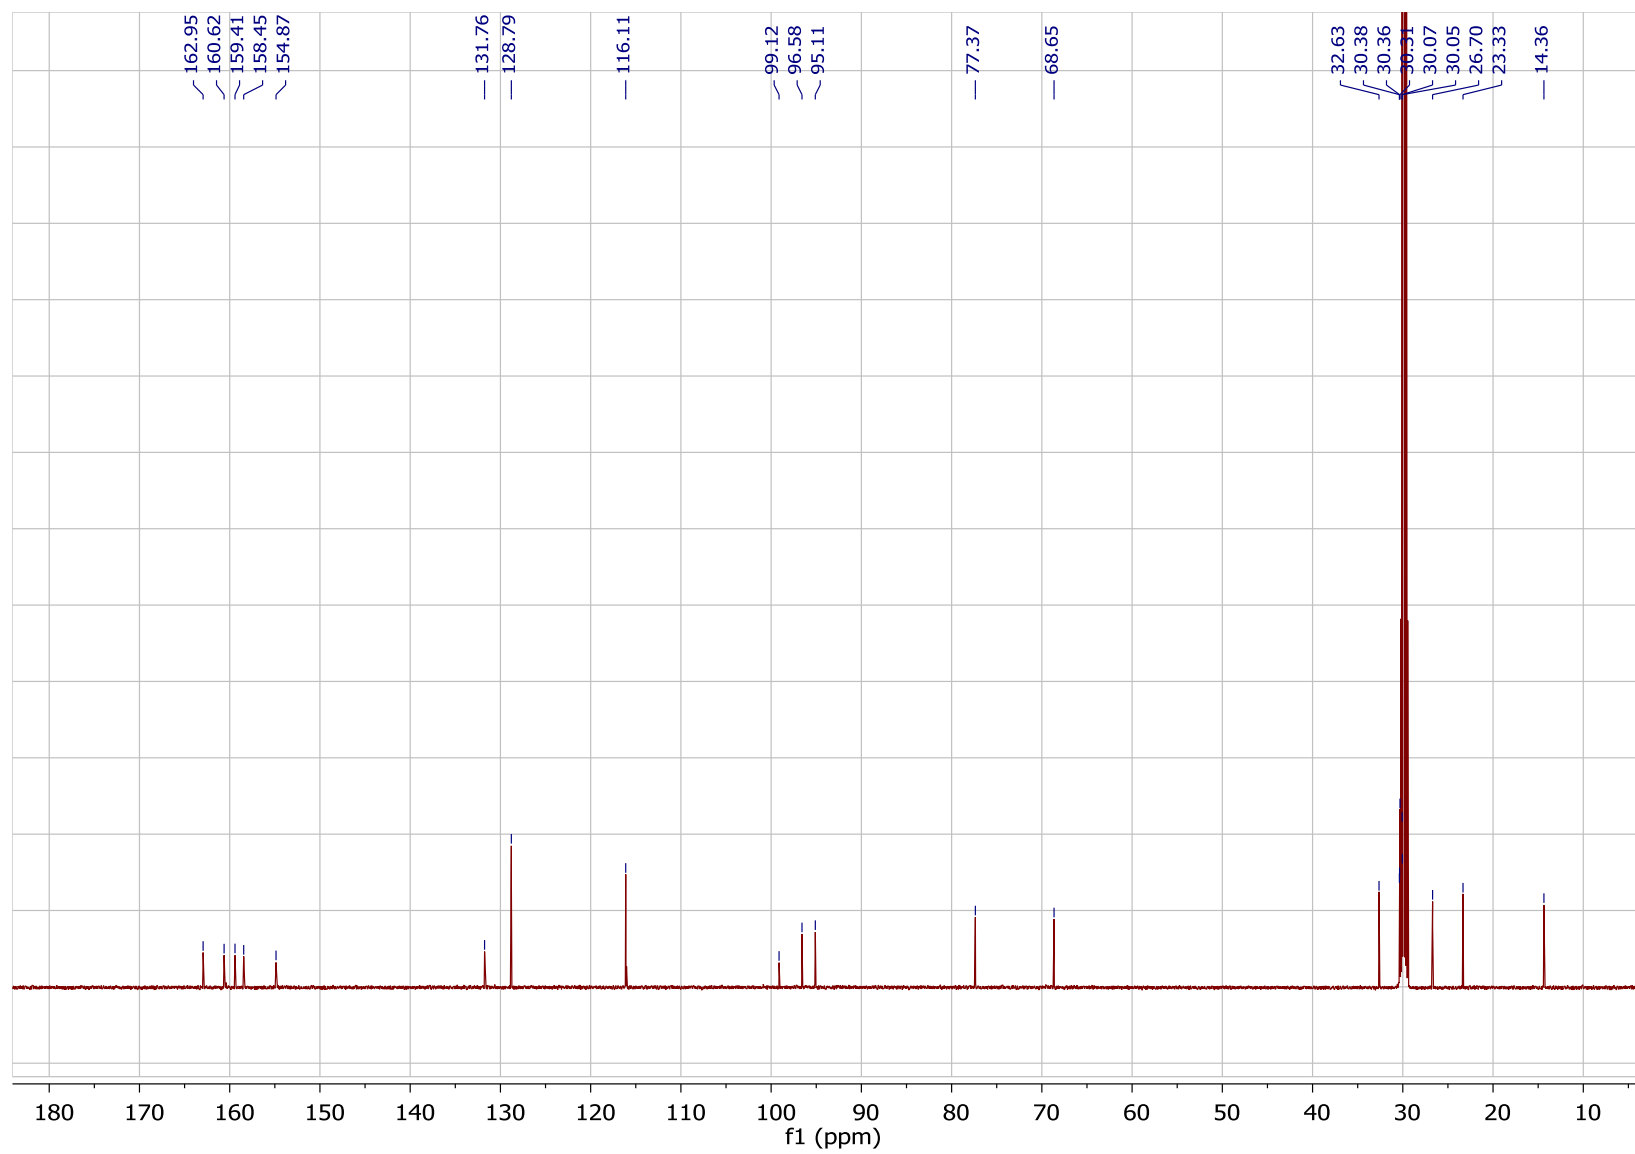

**Figure S38.**  $^{13}\text{C}$ -NMR (150 MHz, Acetone- $\text{d}_6$ ) spectrum of compound **9b**

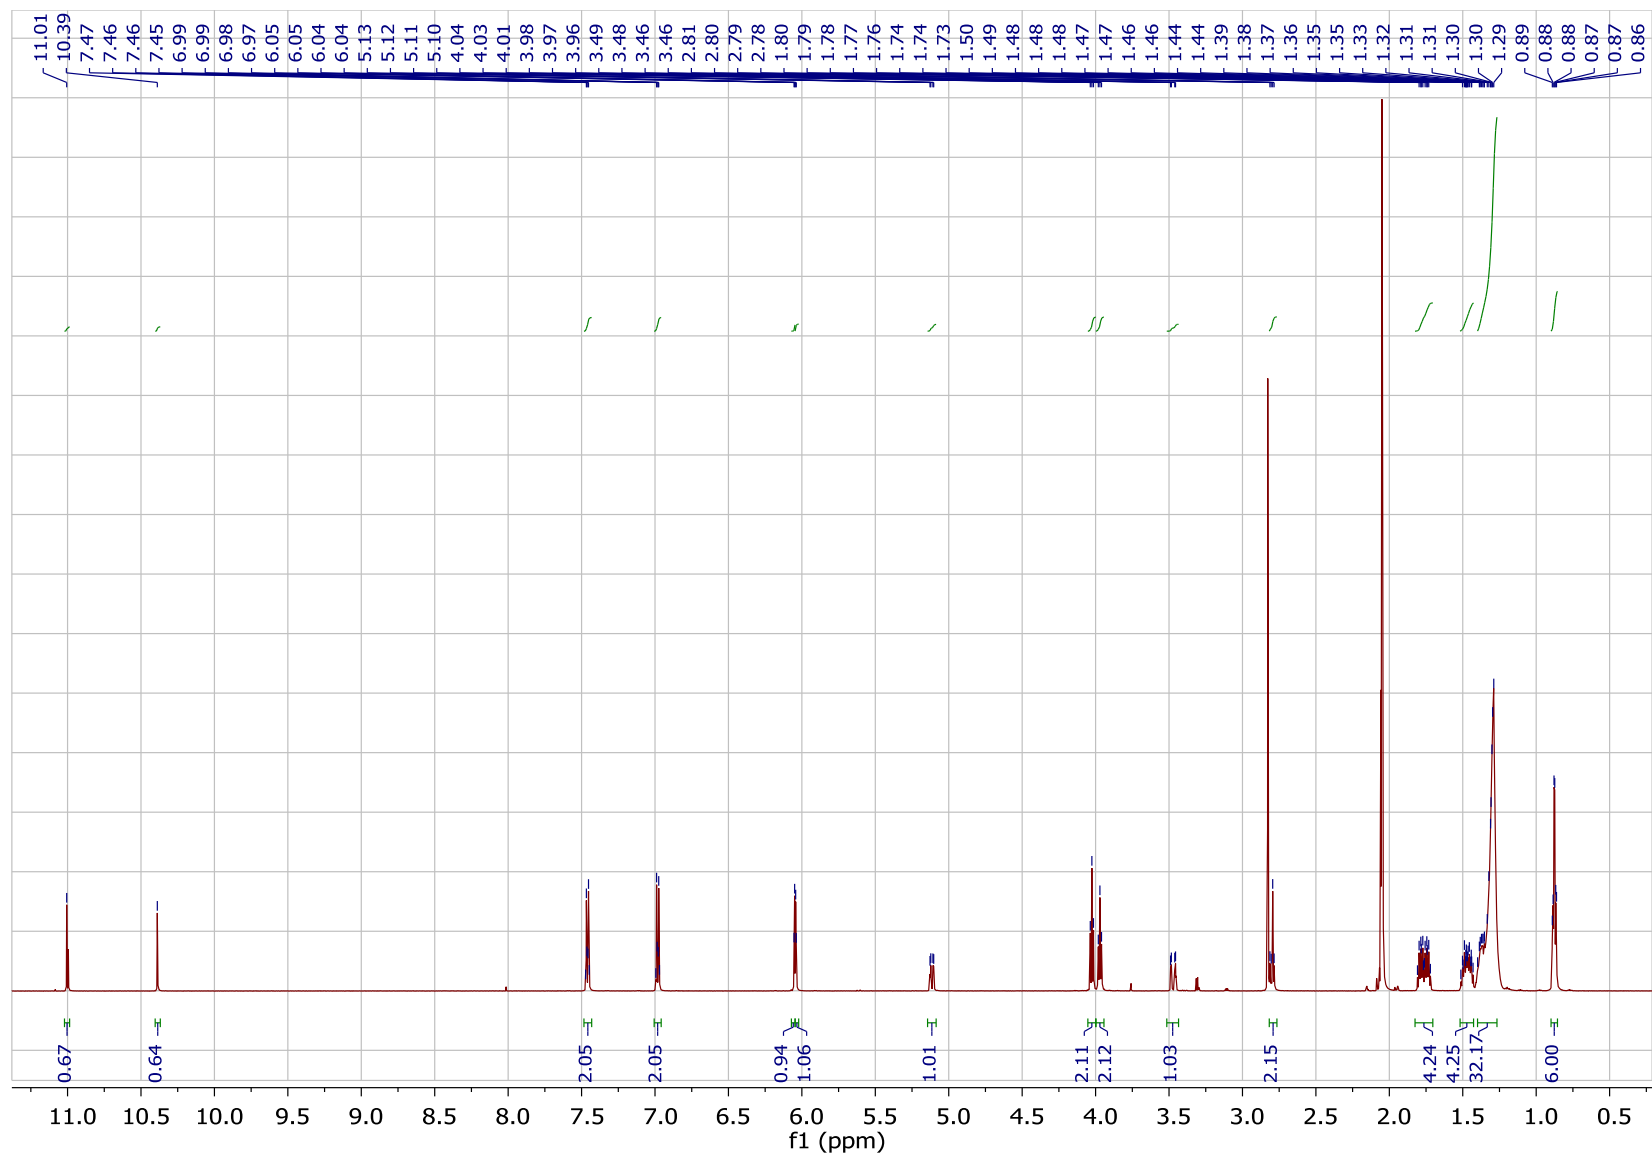

Figure S39.  $^1\text{H-NMR}$  (600 MHz,  $\text{Acetone-d}_6$ ) spectrum of compound **10b**

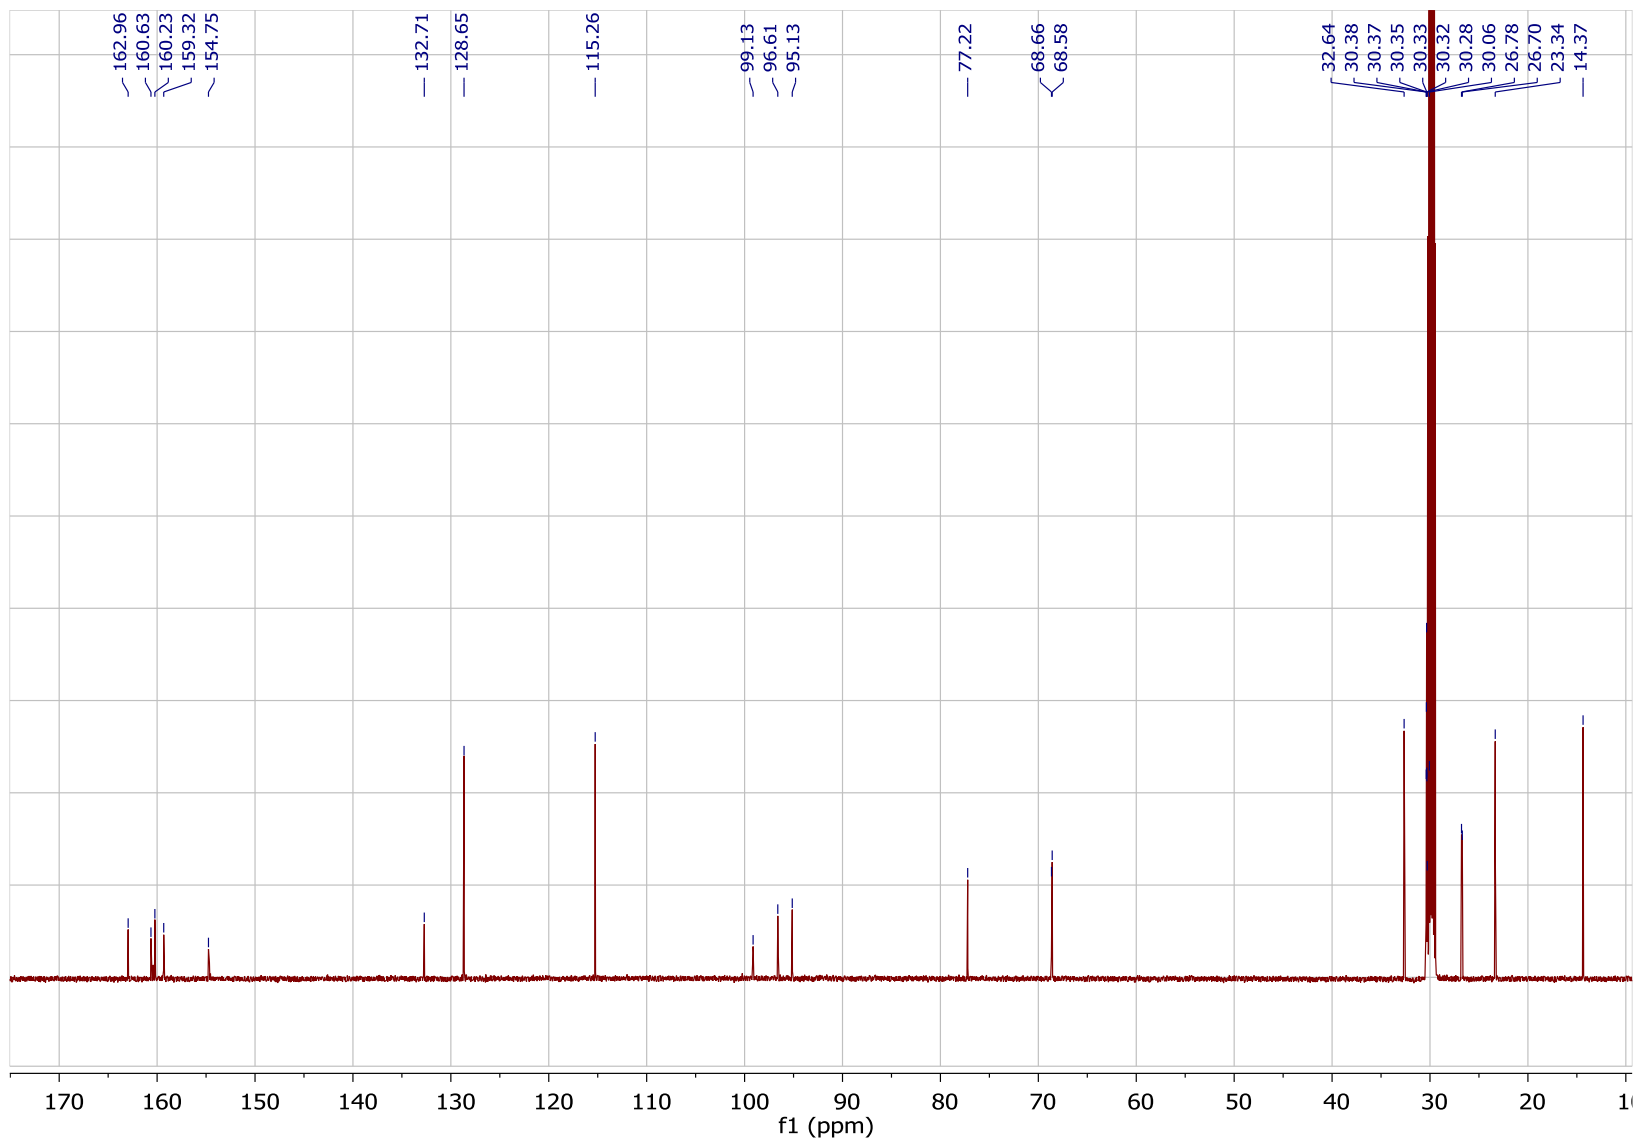

Figure S40. <sup>13</sup>C-NMR (150 MHz, Acetone-d<sub>6</sub>) spectrum of compound **10b**
